# Supplementary material for: Insights on Single-Dose Espresso Coffee Capsules’ Volatile Profile: From Ground Powder Volatiles to Prediction of Espresso Brew Aroma Properties
Source: MDPI journal article supplement (doi:10.3390/foods10102508), 2021-10-19
Supplement: s1 [file s1]

## Supplementary Figures

(Foods)

# Insights on single-dose espresso coffee capsules' volatile profile: from ground powder volatiles to prediction of espresso brew aroma properties

Guido R. Lopes <sup>1,†</sup>, Sílvia Petronilho <sup>1,2,\*,†</sup>, Andreia S. Ferreira <sup>1</sup>, Mariana Pinto <sup>1</sup>, Cláudia P. Passos <sup>1</sup>, Elisabete Coelho <sup>1</sup>, Carla Rodrigues <sup>3</sup>, Cláudia Figueira <sup>4</sup>, Sílvia M. Rocha <sup>1</sup> and Manuel A. Coimbra <sup>1</sup>

<sup>1</sup> LAQV-REQUIMTE, Chemistry Department, Campus Universitário de Santiago, University of Aveiro, 3810-193 Aveiro, Portugal; guido@ua.pt (G.R.L.); silviapetronilho@ua.pt (S.P.); a39493@ua.pt (A.S.F.); a39045@ua.pt (M.P.);

cpassos@ua.pt (C.P.P.); ecoelho@ua.pt (E.C.); smrocha@ua.pt (S.M.R.); mac@ua.pt (M.A.C.)

<sup>2</sup> Chemistry Research Centre-Vila Real, Department of Chemistry, University of Trás os-Montes and Alto Douro, Quinta de Prados, 5001-801 Vila Real, Portugal

<sup>3</sup> Delta Ventures, Av. Infante D. Henrique 151-A 1950-405 Lisboa, Portugal; carla.rodrigues@grupo-nabeiro.pt

<sup>4</sup> Diverge, Grupo Nabeiro Innovation Center, Alameda dos Oceanos 65, 1.1, 1990-208 Lisboa, Portugal; claudia.figueira@gruponabeiro.com

\* Correspondence: silviapetronilho@ua.pt

† G.R.L. and S.P. contributed equally as first authors.

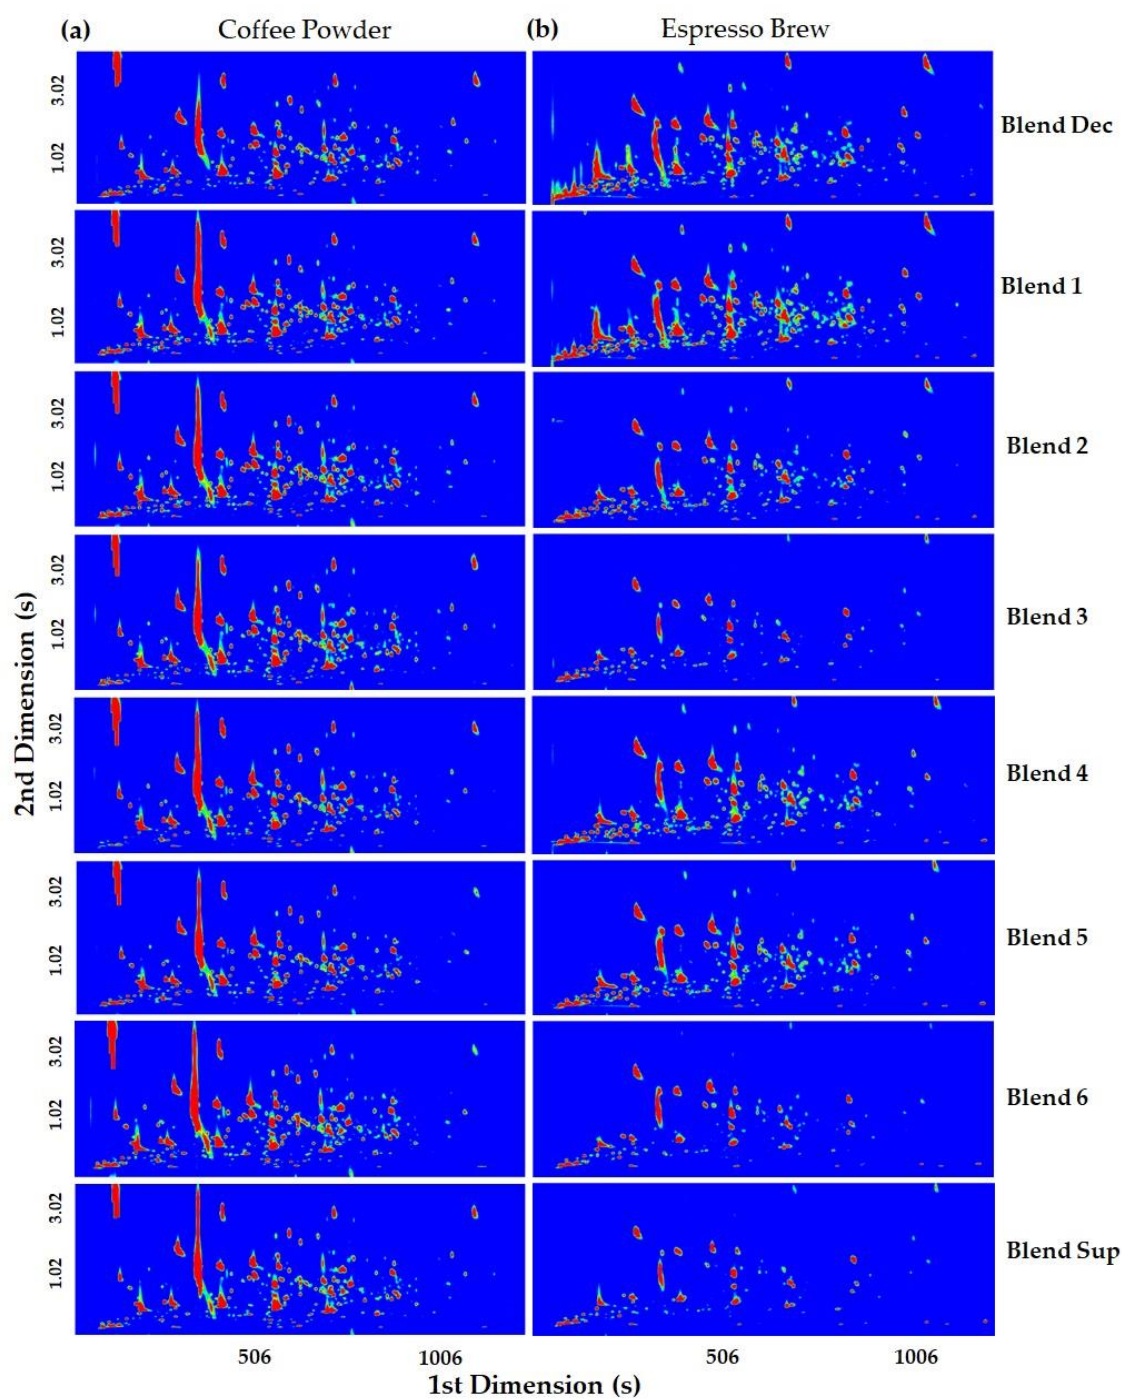

**Figure S1.** Blow-up of the GC  $\times$  GC-ToFMS chromatograms contour plot obtained in full-scan acquisition mode for the 8 capsule coffee powders (a) and respective espresso brews (b) under study.

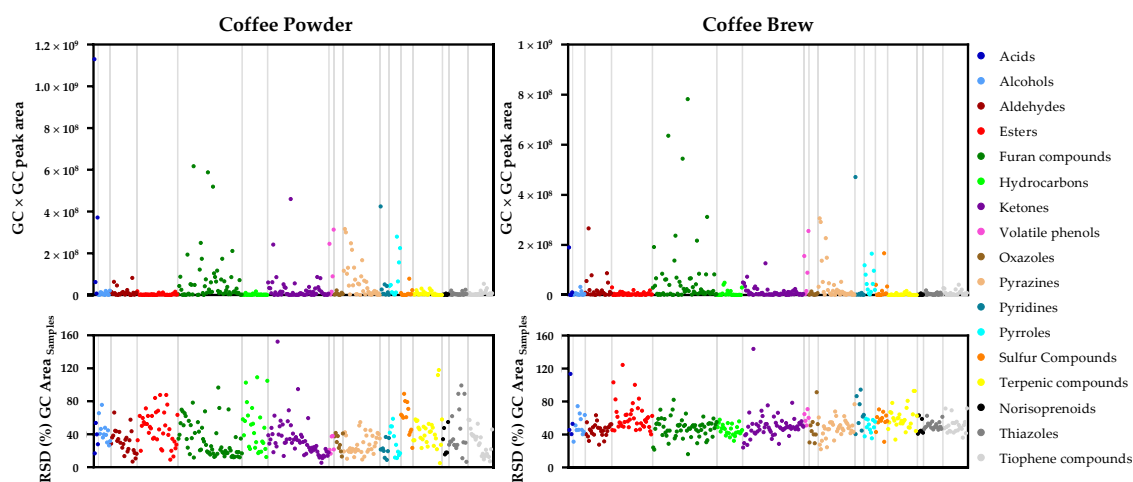

**Figure S2.** Mean values of GC  $\times$  GC peak areas for the compounds analyzed (ordered by chemical family as in Table 1 and S1) and corresponding relative standard deviation (RSD) among all samples (8 blends).

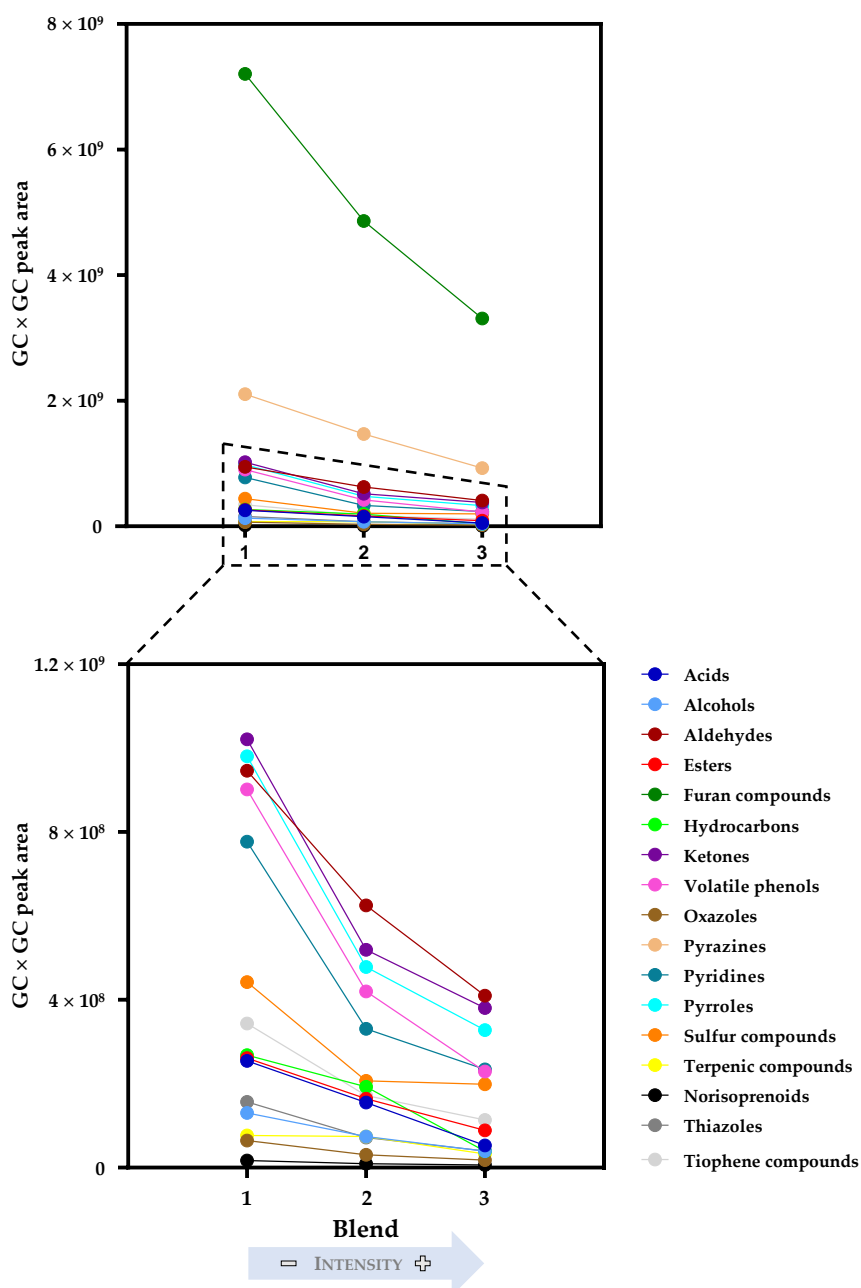

**Figure S3.** GC  $\times$  GC peak areas for the different chemical families determined in the coffee brews considering the blends labeled with different intensities: Blend 1 (intensity 5); Blend 2 (intensity 9), and Blend 3 (intensity 10).

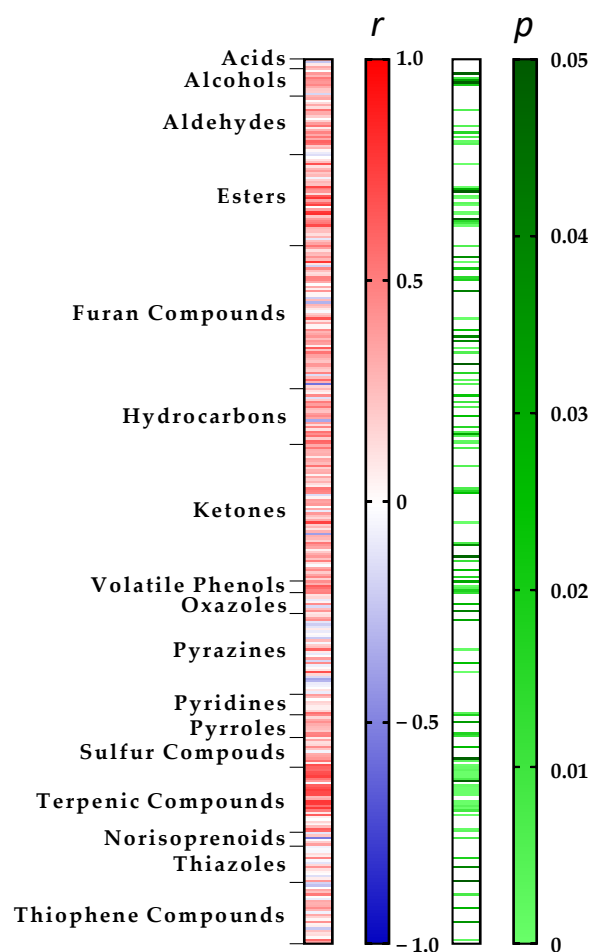

**Figure S4.** Representation of the correlation between coffee powder and coffee brew GC × GC peak areas of the 390 compounds putatively identified through Pearson's correlation coefficients and  $p$ -values associated. Column 1 shows the correlation coefficients of each compound, grouped by its chemical family, illustrated through a chromatic scale shown in column 2, from dark blue ( $r$  low values), to dark red ( $r$  high values). Column 3 shows the  $p$ -values of each compound, grouped by its chemical family, illustrated through a chromatic scale shown in column 4, from light green ( $p$  low values), to dark green ( $p$  high values).
