# Supplementary material for: Insights on Single-Dose Espresso Coffee Capsules’ Volatile Profile: From Ground Powder Volatiles to Prediction of Espresso Brew Aroma Properties
Source: MDPI journal article supplement (doi:10.3390/foods10102508), 2021-10-19
Supplement: s1 [file s1]

## Supplementary Table S2 (Foods)

### Insights on single-dose espresso coffee capsules' volatile profile: from ground powder volatiles to prediction of espresso brew aroma properties

**Guido R. Lopes** <sup>1,†</sup>, **Sílvia Petronilho** <sup>1,2,\*</sup>, **Andreia S. Ferreira** <sup>1</sup>, **Mariana Pinto** <sup>1</sup>, **Claúdia P. Passos** <sup>1</sup>, **Elisabete Coelho** <sup>1</sup>, **Carla Rodrigues** <sup>3</sup>, **Cláudia Figueira** <sup>4</sup>, **Sílvia M. Rocha** <sup>1</sup> and **Manuel A. Coimbra** <sup>1</sup>

<sup>1</sup> LAQV-REQUIMTE, Chemistry Department, Campus Universitário de Santiago, University of Aveiro, 3810-193 Aveiro, Portugal; guido@ua.pt (G.R.L.); silviapetronilho@ua.pt (S.P.); a39493@ua.pt (A.S.F.); a39045@ua.pt (M.P.); cpassos@ua.pt (C.P.P.); ecoelho@ua.pt (E.C.); smrocha@ua.pt (S.M.R.); mac@ua.pt (M.A.C.)

<sup>2</sup> Chemistry Research Centre-Vila Real, Department of Chemistry, University of Trás os-Montes and Alto Douro, Quinta de Prados, 5001-801 Vila Real, Portugal

<sup>3</sup> Delta Ventures, Av. Infante D. Henrique 151-A 1950-405 Lisboa, Portugal; carla.rodrigues@grupo-nabeiro.pt

<sup>4</sup> Diverge, Grupo Nabeiro Innovation Center, Alameda dos Oceanos 65, 1.1, 1990-208 Lisboa, Portugal; claudia.figueira@gruponabeiro.com

\* Correspondence: silviapetronilho@ua.pt

† G.R.L. and S.P. contributed equally as first authors.

**Table S2.** GC × GC peak areas of 390 volatile compounds putatively identified in 8 roasted ground capsule-coffee powders and respective espresso brews, using HS-SPME/GC × GC-ToFMS.

| Peak no. | Compound              | Powder                         |                                |                                |                                |                                |                                |                                |                                | Brew                           |                                |                                |                                |                                |                                |                                |                                |
|----------|-----------------------|--------------------------------|--------------------------------|--------------------------------|--------------------------------|--------------------------------|--------------------------------|--------------------------------|--------------------------------|--------------------------------|--------------------------------|--------------------------------|--------------------------------|--------------------------------|--------------------------------|--------------------------------|--------------------------------|
|          |                       | Dec                            | 1                              | 2                              | 3                              | 4                              | 5                              | 6                              | Sup                            | Dec                            | 1                              | 2                              | 3                              | 4                              | 5                              | 6                              | Sup                            |
|          | <b>Acids</b>          | 1.56×10 <sup>9</sup><br>(17.9) | 1.37×10 <sup>9</sup><br>(23.2) | 1.57×10 <sup>9</sup><br>(15.5) | 1.92×10 <sup>9</sup><br>(8.6)  | 1.66×10 <sup>9</sup><br>(34.8) | 1.56×10 <sup>9</sup><br>(5.0)  | 1.62×10 <sup>9</sup><br>(25.2) | 1.30×10 <sup>9</sup><br>(54.8) | 2.88×10 <sup>8</sup><br>(20.3) | 2.55×10 <sup>8</sup><br>(27.3) | 1.55×10 <sup>8</sup><br>(38.1) | 5.30×10 <sup>7</sup><br>(30.8) | 2.71×10 <sup>8</sup><br>(19.0) | 2.87×10 <sup>8</sup><br>(2.0)  | 2.01×10 <sup>8</sup><br>(17.6) | 1.07×10 <sup>8</sup><br>(63.1) |
|          | <i>Aliphatics</i>     |                                |                                |                                |                                |                                |                                |                                |                                |                                |                                |                                |                                |                                |                                |                                |                                |
| 1        | Acetic acid           | 1.35×10 <sup>9</sup>           | 9.47×10 <sup>8</sup>           | 1.07×10 <sup>9</sup>           | 1.43×10 <sup>9</sup>           | 1.10×10 <sup>9</sup>           | 1.08×10 <sup>9</sup>           | 1.18×10 <sup>9</sup>           | 8.69×10 <sup>8</sup>           | 2.82×10 <sup>8</sup>           | 2.38×10 <sup>8</sup>           | 1.37×10 <sup>8</sup>           | 4.90×10 <sup>7</sup>           | 2.55×10 <sup>8</sup>           | 2.71×10 <sup>8</sup>           | 1.93×10 <sup>8</sup>           | 9.90×10 <sup>7</sup>           |
| 2        | Propanoic acid        | 7.14×10 <sup>7</sup>           | 6.02×10 <sup>7</sup>           | 9.17×10 <sup>7</sup>           | 4.15×10 <sup>7</sup>           | 1.25×10 <sup>8</sup>           | 2.68×10 <sup>7</sup>           | 2.90×10 <sup>7</sup>           | 5.04×10 <sup>7</sup>           | 4.73×10 <sup>5</sup>           | 1.32×10 <sup>5</sup>           | 1.32×10 <sup>5</sup>           | 1.32×10 <sup>5</sup>           | 9.86×10 <sup>5</sup>           | 2.05×10 <sup>6</sup>           | 2.23×10 <sup>6</sup>           | 1.32×10 <sup>5</sup>           |
| 3        | Butanoic acid         | 4.27×10 <sup>6</sup>           | 4.50×10 <sup>6</sup>           | 7.42×10 <sup>6</sup>           | 5.96×10 <sup>6</sup>           | 1.31×10 <sup>7</sup>           | 7.72×10 <sup>6</sup>           | 6.96×10 <sup>6</sup>           | 5.90×10 <sup>6</sup>           | 4.59×10 <sup>4</sup>           | 4.59×10 <sup>4</sup>           | 1.07×10 <sup>5</sup>           | 4.59×10 <sup>4</sup>           |
| 4        | Isovaleric acid       | 1.25×10 <sup>8</sup>           | 3.60×10 <sup>8</sup>           | 4.11×10 <sup>8</sup>           | 4.40×10 <sup>8</sup>           | 4.19×10 <sup>8</sup>           | 4.43×10 <sup>8</sup>           | 3.98×10 <sup>8</sup>           | 3.76×10 <sup>8</sup>           | 5.34×10 <sup>6</sup>           | 1.71×10 <sup>7</sup>           | 1.80×10 <sup>7</sup>           | 3.81×10 <sup>6</sup>           | 1.56×10 <sup>7</sup>           | 1.38×10 <sup>7</sup>           | 6.02×10 <sup>6</sup>           | 7.71×10 <sup>6</sup>           |
|          | <b>Alcohols</b>       | 5.50×10 <sup>7</sup><br>(4.0)  | 1.06×10 <sup>8</sup><br>(7.7)  | 1.14×10 <sup>8</sup><br>(8.5)  | 1.16×10 <sup>8</sup><br>(18.9) | 7.20×10 <sup>7</sup><br>(24.7) | 1.11×10 <sup>8</sup><br>(7.9)  | 8.49×10 <sup>7</sup><br>(8.1)  | 7.32×10 <sup>7</sup><br>(19.7) | 5.94×10 <sup>7</sup><br>(5.1)  | 1.30×10 <sup>8</sup><br>(11.3) | 7.40×10 <sup>7</sup><br>(29.2) | 3.90×10 <sup>7</sup><br>(3.3)  | 1.14×10 <sup>8</sup><br>(7.0)  | 9.14×10 <sup>7</sup><br>(14.7) | 4.58×10 <sup>7</sup><br>(17.1) | 3.95×10 <sup>7</sup><br>(12.5) |
|          | <i>Aliphatics</i>     |                                |                                |                                |                                |                                |                                |                                |                                |                                |                                |                                |                                |                                |                                |                                |                                |
| 5        | 2-Methyl-1-propanol   | 4.95×10 <sup>5</sup>           | 6.61×10 <sup>5</sup>           | 1.60×10 <sup>6</sup>           | 4.55×10 <sup>5</sup>           | 1.80×10 <sup>5</sup>           | 1.44×10 <sup>6</sup>           | 7.85×10 <sup>5</sup>           | 4.81×10 <sup>5</sup>           | 3.83×10 <sup>5</sup>           | 4.95×10 <sup>5</sup>           | 3.69×10 <sup>5</sup>           | 3.44×10 <sup>5</sup>           | 5.35×10 <sup>5</sup>           | 3.77×10 <sup>5</sup>           | 3.23×10 <sup>5</sup>           | 1.50×10 <sup>5</sup>           |
| 6        | 3-Buten-1-ol          | 1.60×10 <sup>6</sup>           | 1.30×10 <sup>6</sup>           | 1.65×10 <sup>6</sup>           | 8.81 ×10 <sup>5</sup>          | 1.60×10 <sup>5</sup>           | 1.48× <sup>6</sup>             | 1.25×10 <sup>6</sup>           | 1.17×10 <sup>6</sup>           | n.d.                           |
| 7        | 3-Methyl-3-buten-1-ol | 8.77×10 <sup>6</sup>           | 1.27×10 <sup>7</sup>           | 1.64×10 <sup>7</sup>           | 1.26×10 <sup>7</sup>           | 6.67×10 <sup>6</sup>           | 2.48×10 <sup>7</sup>           | 1.72×10 <sup>7</sup>           | 6.80×10 <sup>6</sup>           | 9.49×10 <sup>6</sup>           | 8.06×10 <sup>6</sup>           | 5.09×10 <sup>6</sup>           | 1.85×10 <sup>6</sup>           | 8.01×10 <sup>6</sup>           | 1.05×10 <sup>7</sup>           | 6.78×10 <sup>6</sup>           | 1.75×10 <sup>6</sup>           |
| 8        | 2-Methyl-1-butanol    | 2.10 ×10 <sup>6</sup>          | 1.49×10 <sup>7</sup>           | 2.46×10 <sup>7</sup>           | 1.71×10 <sup>7</sup>           | 2.34×10 <sup>6</sup>           | 1.95×10 <sup>7</sup>           | 8.09×10 <sup>6</sup>           | 3.28×10 <sup>6</sup>           | 4.24×10 <sup>6</sup>           | 7.99×10 <sup>6</sup>           | 6.15×10 <sup>6</sup>           | 3.47×10 <sup>6</sup>           | 1.00×10 <sup>7</sup>           | 1.09×10 <sup>7</sup>           | 6.64×10 <sup>6</sup>           | 2.85×10 <sup>6</sup>           |
| 9        | 1-Pentanol            | 3.33×10 <sup>6</sup>           | 2.40×10 <sup>6</sup>           | 2.91×10 <sup>6</sup>           | 2.17×10 <sup>6</sup>           | 2.99×10 <sup>6</sup>           | 5.22×10 <sup>6</sup>           | 4.63×10 <sup>6</sup>           | 2.01×10 <sup>6</sup>           | 1.40×10 <sup>6</sup>           | 2.43×10 <sup>6</sup>           | 1.36×10 <sup>6</sup>           | 6.25×10 <sup>5</sup>           | 5.11×10 <sup>6</sup>           | 5.17×10 <sup>6</sup>           | 2.90×10 <sup>6</sup>           | 6.72×10 <sup>5</sup>           |
| 10       | 3-Methyl-2-buten-1-ol | 3.29×10 <sup>6</sup>           | 6.58×10 <sup>6</sup>           | 7.74×10 <sup>6</sup>           | 6.01×10 <sup>6</sup>           | 3.75×10 <sup>6</sup>           | 7.85×10 <sup>6</sup>           | 1.00×10 <sup>7</sup>           | 3.55×10 <sup>6</sup>           | 3.08×10 <sup>6</sup>           | 4.13×10 <sup>6</sup>           | 2.32×10 <sup>6</sup>           | 1.20×10 <sup>6</sup>           | 3.76×10 <sup>6</sup>           | 4.63×10 <sup>6</sup>           | 4.07×10 <sup>6</sup>           | 9.92×10 <sup>5</sup>           |
| 11       | 2-Hexanol             | 2.69×10 <sup>5</sup>           | 6.51×10 <sup>5</sup>           | 5.68×10 <sup>5</sup>           | 6.45 ×10 <sup>5</sup>          | 2.32×10 <sup>5</sup>           | 3.57×10 <sup>5</sup>           | 1.55×10 <sup>5</sup>           | 3.46×10 <sup>5</sup>           | 4.60×10 <sup>5</sup>           | 1.31×10 <sup>6</sup>           | 5.51×10 <sup>5</sup>           | 3.02×10 <sup>5</sup>           | 8.88×10 <sup>5</sup>           | 5.26×10 <sup>5</sup>           | 1.90×10 <sup>5</sup>           | 2.93×10 <sup>5</sup>           |
| 12       | 2-Heptanol            | 1.33×10 <sup>7</sup>           | 3.03×10 <sup>7</sup>           | 2.54×10 <sup>7</sup>           | 2.84×10 <sup>7</sup>           | 1.44×10 <sup>7</sup>           | 1.66×10 <sup>7</sup>           | 8.67×10 <sup>6</sup>           | 2.18×10 <sup>7</sup>           | 2.12×10 <sup>7</sup>           | 6.91×10 <sup>7</sup>           | 3.42×10 <sup>7</sup>           | 2.06×10 <sup>7</sup>           | 5.00×10 <sup>7</sup>           | 3.22×10 <sup>7</sup>           | 1.04×10 <sup>7</sup>           | 2.16×10 <sup>7</sup>           |
| 13       | 1-Octen-3-ol          | 1.12×10 <sup>7</sup>           | 1.61×10 <sup>7</sup>           | 8.38×10 <sup>6</sup>           | 1.47×10 <sup>7</sup>           | 1.27×10 <sup>7</sup>           | 1.10×10 <sup>7</sup>           | 1.49×10 <sup>7</sup>           | 5.65×10 <sup>6</sup>           | 1.27×10 <sup>7</sup>           | 2.35×10 <sup>7</sup>           | 1.58×10 <sup>7</sup>           | 7.29×10 <sup>6</sup>           | 2.66×10 <sup>7</sup>           | 1.72×10 <sup>7</sup>           | 1.11×10 <sup>7</sup>           | 7.92×10 <sup>6</sup>           |
| 14       | 2-Ethyl-1-hexanol     | 1.46×10 <sup>6</sup>           | 1.65×10 <sup>6</sup>           | 1.92×10 <sup>6</sup>           | 1.90×10 <sup>6</sup>           | 4.04×10 <sup>6</sup>           | 1.44×10 <sup>6</sup>           | 1.43×10 <sup>6</sup>           | 1.69×10 <sup>6</sup>           | 1.66×10 <sup>6</sup>           | 1.35×10 <sup>6</sup>           | 1.65×10 <sup>6</sup>           | 1.17×10 <sup>6</sup>           | 8.88×10 <sup>5</sup>           | 8.71 ×10 <sup>5</sup>          | 5.62 ×10 <sup>5</sup>          | 5.68 ×10 <sup>5</sup>          |
| 15       | 1-Octanol             | 6.00×10 <sup>5</sup>           | 8.53×10 <sup>5</sup>           | 6.04×10 <sup>5</sup>           | 1.15×10 <sup>6</sup>           | 1.10×10 <sup>6</sup>           | 1.07×10 <sup>6</sup>           | 7.09 ×10 <sup>5</sup>          | 1.12×10 <sup>6</sup>           | 1.23×10 <sup>6</sup>           | 2.32×10 <sup>6</sup>           | 1.38×10 <sup>6</sup>           | 8.71 ×10 <sup>5</sup>          | 1.67×10 <sup>6</sup>           | 2.32×10 <sup>6</sup>           | 1.19×10 <sup>6</sup>           | 5.97×10 <sup>5</sup>           |
|          | <i>Aromatics</i>      |                                |                                |                                |                                |                                |                                |                                |                                |                                |                                |                                |                                |                                |                                |                                |                                |
| 16       | 2-Phenylethanol       | 8.60×10 <sup>6</sup>           | 1.74 ×10 <sup>7</sup>          | 2.23×10 <sup>7</sup>           | 3.05×10 <sup>7</sup>           | 2.34 ×10 <sup>7</sup>          | 2.03×10 <sup>7</sup>           | 1.71×10 <sup>7</sup>           | 2.53×10 <sup>7</sup>           | 3.57×10 <sup>6</sup>           | 9.46×10 <sup>6</sup>           | 5.10×10 <sup>6</sup>           | 1.31×10 <sup>6</sup>           | 6.42×10 <sup>6</sup>           | 6.75×10 <sup>6</sup>           | 1.63×10 <sup>6</sup>           | 2.12×10 <sup>6</sup>           |
|          | <b>Aldehydes</b>      | 4.31×10 <sup>8</sup><br>(7.7)  | 3.33×10 <sup>8</sup><br>(9.0)  | 3.40×10 <sup>8</sup><br>(16.1) | 3.52×10 <sup>8</sup><br>(19.7) | 2.78×10 <sup>8</sup><br>(26.3) | 4.68×10 <sup>8</sup><br>(39.6) | 3.65×10 <sup>8</sup><br>(9.1)  | 3.13×10 <sup>8</sup><br>(27.2) | 1.08×10 <sup>9</sup><br>(3.1)  | 9.46×10 <sup>8</sup><br>(15.6) | 6.25×10 <sup>8</sup><br>(22.1) | 4.10×10 <sup>8</sup><br>(2.3)  | 8.59×10 <sup>8</sup><br>(8.4)  | 7.81×10 <sup>8</sup><br>(6.2)  | 5.36×10 <sup>8</sup><br>(16.9) | 3.68×10 <sup>8</sup><br>(5.2)  |
|          | <i>Aliphatics</i>     |                                |                                |                                |                                |                                |                                |                                |                                |                                |                                |                                |                                |                                |                                |                                |                                |
| 17       | Acetaldehyde          | 1.81×10 <sup>7</sup>           | 1.49×10 <sup>7</sup>           | 1.46×10 <sup>7</sup>           | 2.50×10 <sup>7</sup>           | 1.54×10 <sup>7</sup>           | 1.99×10 <sup>7</sup>           | 1.18×10 <sup>7</sup>           | 1.05×10 <sup>7</sup>           | 1.30×10 <sup>7</sup>           | 1.14×10 <sup>7</sup>           | 3.01×10 <sup>6</sup>           | 6.85×10 <sup>6</sup>           | 1.23×10 <sup>7</sup>           | 1.23×10 <sup>7</sup>           | 8.83×10 <sup>6</sup>           | 5.40×10 <sup>6</sup>           |

|            |                       |                               |                                |                               |                               |                                |                                |                                |                                |                                |                                |                                |                                |                               |                                |                                |                                |
|------------|-----------------------|-------------------------------|--------------------------------|-------------------------------|-------------------------------|--------------------------------|--------------------------------|--------------------------------|--------------------------------|--------------------------------|--------------------------------|--------------------------------|--------------------------------|-------------------------------|--------------------------------|--------------------------------|--------------------------------|
| 18         | 2-Methylpropanal      | 1.31×10 <sup>7</sup>          | 1.41×10 <sup>7</sup>           | 1.44×10 <sup>7</sup>          | 1.39×10 <sup>7</sup>          | 5.04×10 <sup>6</sup>           | 2.03×10 <sup>7</sup>           | 1.41×10 <sup>7</sup>           | 7.68×10 <sup>6</sup>           | 1.27×10 <sup>8</sup>           | 5.35×10 <sup>7</sup>           | 4.95×10 <sup>7</sup>           | 4.11×10 <sup>7</sup>           | 4.34×10 <sup>7</sup>          | 6.20×10 <sup>7</sup>           | 4.48×10 <sup>7</sup>           | 2.52×10 <sup>7</sup>           |
| 19         | 2-Butenal             | 5.88×10 <sup>6</sup>          | 4.38×10 <sup>6</sup>           | 4.58×10 <sup>6</sup>          | 8.14×10 <sup>6</sup>          | 1.60×10 <sup>6</sup>           | 4.80×10 <sup>6</sup>           | 3.85×10 <sup>6</sup>           | 5.88×10 <sup>6</sup>           | 7.39×10 <sup>6</sup>           | 4.95×10 <sup>6</sup>           | 3.55×10 <sup>6</sup>           | 3.43×10 <sup>6</sup>           | 5.70×10 <sup>6</sup>          | 5.97×10 <sup>6</sup>           | 3.05×10 <sup>6</sup>           | 2.41×10 <sup>6</sup>           |
| 20         | 3-Methylbutanal       | 7.30×10 <sup>7</sup>          | 5.07×10 <sup>7</sup>           | 5.26×10 <sup>7</sup>          | 5.09×10 <sup>7</sup>          | 1.70×10 <sup>7</sup>           | 1.60×10 <sup>8</sup>           | 6.43×10 <sup>7</sup>           | 4.03×10 <sup>7</sup>           | 3.76×10 <sup>8</sup>           | 3.97×10 <sup>8</sup>           | 2.32×10 <sup>8</sup>           | 2.00×10 <sup>8</sup>           | 3.01×10 <sup>8</sup>          | 2.61×10 <sup>8</sup>           | 1.99×10 <sup>8</sup>           | 1.61×10 <sup>8</sup>           |
| 21         | 2-Methyl-2-butenal    | 8.70×10 <sup>6</sup>          | 1.12×10 <sup>7</sup>           | 1.40×10 <sup>7</sup>          | 7.70×10 <sup>6</sup>          | 3.04×10 <sup>6</sup>           | 1.46×10 <sup>7</sup>           | 9.45×10 <sup>6</sup>           | 4.84×10 <sup>6</sup>           | 3.01×10 <sup>7</sup>           | 2.84×10 <sup>7</sup>           | 1.52×10 <sup>7</sup>           | 9.34×10 <sup>6</sup>           | 2.63×10 <sup>7</sup>          | 2.92×10 <sup>7</sup>           | 1.65×10 <sup>7</sup>           | 7.06×10 <sup>6</sup>           |
| 22         | 2-Pentenal            | 2.22×10 <sup>6</sup>          | 1.00×10 <sup>6</sup>           | 1.19×10 <sup>6</sup>          | 2.10×10 <sup>6</sup>          | 5.44×10 <sup>5</sup>           | 1.14×10 <sup>6</sup>           | 1.14×10 <sup>6</sup>           | 1.08×10 <sup>6</sup>           | 4.10×10 <sup>6</sup>           | 3.21×10 <sup>6</sup>           | 1.29×10 <sup>6</sup>           | 1.38×10 <sup>6</sup>           | 3.53×10 <sup>6</sup>          | 3.23×10 <sup>6</sup>           | 2.15×10 <sup>6</sup>           | 1.31×10 <sup>6</sup>           |
| 23         | Hexanal               | 7.67×10 <sup>7</sup>          | 3.81×10 <sup>7</sup>           | 3.89×10 <sup>7</sup>          | 3.37×10 <sup>7</sup>          | 3.02×10 <sup>7</sup>           | 4.97×10 <sup>7</sup>           | 5.29×10 <sup>7</sup>           | 4.83×10 <sup>7</sup>           | 1.24×10 <sup>8</sup>           | 8.84×10 <sup>7</sup>           | 6.44×10 <sup>7</sup>           | 3.21×10 <sup>7</sup>           | 1.19×10 <sup>8</sup>          | 8.93×10 <sup>7</sup>           | 6.28×10 <sup>7</sup>           | 4.84×10 <sup>7</sup>           |
| 24         | 4-Methyl-3-pentenal   | 5.42×10 <sup>5</sup>          | 5.09×10 <sup>5</sup>           | 5.73×10 <sup>5</sup>          | 4.36×10 <sup>5</sup>          | 1.53×10 <sup>5</sup>           | 5.58×10 <sup>5</sup>           | 3.54×10 <sup>5</sup>           | 3.18×10 <sup>5</sup>           | 3.60×10 <sup>6</sup>           | 3.06×10 <sup>6</sup>           | 1.51×10 <sup>6</sup>           | 1.09×10 <sup>6</sup>           | 3.10×10 <sup>6</sup>          | 3.18×10 <sup>6</sup>           | 1.52×10 <sup>6</sup>           | 8.67×10 <sup>5</sup>           |
| 25         | 2-Methyl-2-hexenal    | 6.28×10 <sup>6</sup>          | 7.24×10 <sup>6</sup>           | 7.80×10 <sup>6</sup>          | 5.18×10 <sup>6</sup>          | 7.57×10 <sup>5</sup>           | 5.77×10 <sup>6</sup>           | 3.95×10 <sup>6</sup>           | 4.40×10 <sup>6</sup>           | 1.14×10 <sup>7</sup>           | 1.76×10 <sup>7</sup>           | 9.93×10 <sup>6</sup>           | 6.39×10 <sup>6</sup>           | 1.23×10 <sup>7</sup>          | 1.40×10 <sup>7</sup>           | 6.82×10 <sup>6</sup>           | 5.42×10 <sup>6</sup>           |
| 26         | 2,4-Hexadienal        | 2.54×10 <sup>6</sup>          | 3.42×10 <sup>6</sup>           | 3.72×10 <sup>6</sup>          | 3.14×10 <sup>6</sup>          | 1.50×10 <sup>6</sup>           | 3.85×10 <sup>6</sup>           | 3.54×10 <sup>6</sup>           | 1.91×10 <sup>6</sup>           | 1.38×10 <sup>6</sup>           | 1.71×10 <sup>6</sup>           | 8.19×10 <sup>5</sup>           | 3.45×10 <sup>5</sup>           | 1.52×10 <sup>6</sup>          | 1.67×10 <sup>6</sup>           | 1.09×10 <sup>6</sup>           | 2.99×10 <sup>5</sup>           |
| 27         | 4-Methylhexanal       | n.d.                          | n.d.                           | n.d.                          | n.d.                          | n.d.                           | n.d.                           | n.d.                           | n.d.                           | 9.93×10 <sup>5</sup>           | 1.60×10 <sup>6</sup>           | 4.07×10 <sup>5</sup>           | 3.97×10 <sup>5</sup>           | 7.19×10 <sup>5</sup>          | 7.59×10 <sup>5</sup>           | 3.52×10 <sup>5</sup>           | 3.19×10 <sup>5</sup>           |
| 28         | Heptanal              | 1.48×10 <sup>7</sup>          | 8.52×10 <sup>6</sup>           | 9.20×10 <sup>6</sup>          | 1.19×10 <sup>7</sup>          | 8.77×10 <sup>6</sup>           | 1.40×10 <sup>7</sup>           | 1.55×10 <sup>7</sup>           | 1.10×10 <sup>7</sup>           | 1.87×10 <sup>7</sup>           | 1.51×10 <sup>7</sup>           | 3.82×10 <sup>7</sup>           | 6.19×10 <sup>6</sup>           | 2.59×10 <sup>7</sup>          | 2.31×10 <sup>7</sup>           | 1.44×10 <sup>7</sup>           | 6.64×10 <sup>6</sup>           |
| 29         | 2-Heptenal            | 2.31×10 <sup>7</sup>          | 1.01×10 <sup>7</sup>           | 1.20×10 <sup>7</sup>          | 1.40×10 <sup>7</sup>          | 1.34×10 <sup>7</sup>           | 1.21×10 <sup>7</sup>           | 1.81×10 <sup>7</sup>           | 1.64×10 <sup>7</sup>           | 1.58×10 <sup>7</sup>           | 1.32×10 <sup>7</sup>           | 1.66×10 <sup>7</sup>           | 3.67×10 <sup>6</sup>           | 2.65×10 <sup>7</sup>          | 2.12×10 <sup>7</sup>           | 1.39×10 <sup>7</sup>           | 7.79×10 <sup>6</sup>           |
| 30         | Octanal               | 5.58×10 <sup>6</sup>          | 4.43×10 <sup>6</sup>           | 4.16×10 <sup>6</sup>          | 4.41×10 <sup>6</sup>          | 5.77×10 <sup>6</sup>           | 4.00×10 <sup>6</sup>           | 4.76×10 <sup>6</sup>           | 4.66×10 <sup>6</sup>           | 6.17×10 <sup>6</sup>           | 4.59×10 <sup>6</sup>           | 4.29×10 <sup>6</sup>           | 3.29×10 <sup>6</sup>           | 5.29×10 <sup>6</sup>          | 5.50×10 <sup>6</sup>           | 3.05×10 <sup>6</sup>           | 2.94×10 <sup>6</sup>           |
| 31         | 2,4-Heptadienal       | 2.53×10 <sup>6</sup>          | 1.74×10 <sup>6</sup>           | 1.98×10 <sup>6</sup>          | 2.68×10 <sup>6</sup>          | 2.10×10 <sup>6</sup>           | 1.95×10 <sup>6</sup>           | 3.95×10 <sup>6</sup>           | 1.51×10 <sup>6</sup>           | 3.36×10 <sup>6</sup>           | 4.76×10 <sup>6</sup>           | 2.62×10 <sup>6</sup>           | 9.42×10 <sup>5</sup>           | 4.09×10 <sup>6</sup>          | 4.10×10 <sup>6</sup>           | 2.74×10 <sup>6</sup>           | 1.06×10 <sup>6</sup>           |
| 32         | 2-Octenal             | 1.27×10 <sup>7</sup>          | 3.23×10 <sup>6</sup>           | 7.03×10 <sup>6</sup>          | 1.32×10 <sup>7</sup>          | 1.22×10 <sup>7</sup>           | 7.63×10 <sup>6</sup>           | 1.18×10 <sup>7</sup>           | 1.15×10 <sup>7</sup>           | 1.34×10 <sup>7</sup>           | 9.32×10 <sup>6</sup>           | 9.99×10 <sup>6</sup>           | 2.83×10 <sup>6</sup>           | 1.41×10 <sup>7</sup>          | 1.05×10 <sup>7</sup>           | 7.21×10 <sup>6</sup>           | 4.63×10 <sup>6</sup>           |
| 33         | Nonanal               | 2.86×10 <sup>7</sup>          | 2.08×10 <sup>7</sup>           | 2.39×10 <sup>7</sup>          | 2.33×10 <sup>7</sup>          | 3.14×10 <sup>7</sup>           | 1.82×10 <sup>7</sup>           | 1.94×10 <sup>7</sup>           | 2.58×10 <sup>7</sup>           | 3.31×10 <sup>7</sup>           | 2.24×10 <sup>7</sup>           | 1.67×10 <sup>7</sup>           | 1.31×10 <sup>7</sup>           | 2.20×10 <sup>7</sup>          | 1.94×10 <sup>7</sup>           | 1.29×10 <sup>7</sup>           | 9.68×10 <sup>6</sup>           |
| 34         | 2-Nonenal             | 9.95×10 <sup>6</sup>          | 8.66×10 <sup>6</sup>           | 5.93×10 <sup>6</sup>          | 7.45×10 <sup>6</sup>          | 1.19×10 <sup>7</sup>           | 7.44×10 <sup>6</sup>           | 9.64×10 <sup>6</sup>           | 1.09×10 <sup>7</sup>           | 1.68×10 <sup>7</sup>           | 1.31×10 <sup>7</sup>           | 8.59×10 <sup>6</sup>           | 5.25×10 <sup>6</sup>           | 1.29×10 <sup>7</sup>          | 1.11×10 <sup>7</sup>           | 6.79×10 <sup>6</sup>           | 4.18×10 <sup>6</sup>           |
| 35         | Decanal               | 3.59×10 <sup>6</sup>          | 7.33×10 <sup>6</sup>           | 9.81×10 <sup>6</sup>          | 7.93×10 <sup>6</sup>          | 7.16×10 <sup>6</sup>           | 7.37×10 <sup>6</sup>           | 4.67×10 <sup>6</sup>           | 4.25×10 <sup>6</sup>           | 9.25×10 <sup>6</sup>           | 1.05×10 <sup>7</sup>           | 7.38×10 <sup>6</sup>           | 7.78×10 <sup>6</sup>           | 8.89×10 <sup>6</sup>          | 7.78×10 <sup>6</sup>           | 4.62×10 <sup>6</sup>           | 3.40×10 <sup>6</sup>           |
| 36         | Undecanal             | 1.02×10 <sup>5</sup>          | 2.41×10 <sup>5</sup>           | 2.07×10 <sup>5</sup>          | 6.60×10 <sup>4</sup>          | 2.22×10 <sup>5</sup>           | 4.96×10 <sup>5</sup>           | 1.92×10 <sup>5</sup>           | 2.81×10 <sup>5</sup>           | 1.71×10 <sup>6</sup>           | 2.27×10 <sup>6</sup>           | 1.12×10 <sup>6</sup>           | 7.00×10 <sup>5</sup>           | 1.48×10 <sup>6</sup>          | 1.29×10 <sup>6</sup>           | 5.20×10 <sup>5</sup>           | 7.06×10 <sup>5</sup>           |
| 37         | Dodecanal             | 2.10×10 <sup>5</sup>          | 2.24×10 <sup>5</sup>           | 1.88×10 <sup>5</sup>          | 4.65×10 <sup>4</sup>          | 3.83×10 <sup>5</sup>           | 2.12×10 <sup>5</sup>           | 1.83×10 <sup>5</sup>           | 2.71×10 <sup>5</sup>           | 2.24×10 <sup>6</sup>           | 3.12×10 <sup>6</sup>           | 2.11×10 <sup>6</sup>           | 4.98×10 <sup>5</sup>           | 2.18×10 <sup>6</sup>          | 2.12×10 <sup>6</sup>           | 1.61×10 <sup>6</sup>           | 1.45×10 <sup>6</sup>           |
| Aromatics  |                       |                               |                                |                               |                               |                                |                                |                                |                                |                                |                                |                                |                                |                               |                                |                                |                                |
| 38         | Benzaldehyde          | 9.15×10 <sup>7</sup>          | 8.80×10 <sup>7</sup>           | 7.98×10 <sup>7</sup>          | 7.90×10 <sup>7</sup>          | 7.87×10 <sup>7</sup>           | 8.58×10 <sup>7</sup>           | 7.86×10 <sup>7</sup>           | 7.51×10 <sup>7</sup>           | 1.37×10 <sup>8</sup>           | 1.30×10 <sup>8</sup>           | 7.90×10 <sup>7</sup>           | 3.60×10 <sup>7</sup>           | 1.09×10 <sup>8</sup>          | 1.01×10 <sup>8</sup>           | 6.52×10 <sup>7</sup>           | 4.04×10 <sup>7</sup>           |
| 39         | Benzeneacetaldehyde   | 9.98×10 <sup>6</sup>          | 1.41×10 <sup>7</sup>           | 1.21×10 <sup>7</sup>          | 1.27×10 <sup>7</sup>          | 1.11×10 <sup>7</sup>           | 7.87×10 <sup>6</sup>           | 1.07×10 <sup>7</sup>           | 7.72×10 <sup>6</sup>           | 8.23×10 <sup>7</sup>           | 7.15×10 <sup>7</sup>           | 3.86×10 <sup>7</sup>           | 1.93×10 <sup>7</sup>           | 6.68×10 <sup>7</sup>          | 6.37×10 <sup>7</sup>           | 3.84×10 <sup>7</sup>           | 1.90×10 <sup>7</sup>           |
| 40         | 2-Hydroxybenzaldehyde | 1.24×10 <sup>6</sup>          | 1.17×10 <sup>6</sup>           | 1.39×10 <sup>6</sup>          | 1.30×10 <sup>6</sup>          | 1.71×10 <sup>6</sup>           | 1.51×10 <sup>6</sup>           | 1.75×10 <sup>6</sup>           | 1.11×10 <sup>6</sup>           | 2.59×10 <sup>6</sup>           | 2.91×10 <sup>6</sup>           | 1.56×10 <sup>6</sup>           | 6.01×10 <sup>5</sup>           | 2.48×10 <sup>6</sup>          | 2.36×10 <sup>6</sup>           | 1.65×10 <sup>6</sup>           | 5.24×10 <sup>5</sup>           |
| 41         | 2-Methylbenzaldehyde  | 8.38×10 <sup>6</sup>          | 9.11×10 <sup>6</sup>           | 9.82×10 <sup>6</sup>          | 9.47×10 <sup>6</sup>          | 8.05×10 <sup>6</sup>           | 9.53×10 <sup>6</sup>           | 1.05×10 <sup>7</sup>           | 7.70×10 <sup>6</sup>           | 2.27×10 <sup>7</sup>           | 1.92×10 <sup>7</sup>           | 1.02×10 <sup>7</sup>           | 4.44×10 <sup>6</sup>           | 1.69×10 <sup>7</sup>          | 1.61×10 <sup>7</sup>           | 1.03×10 <sup>7</sup>           | 4.19×10 <sup>6</sup>           |
| 42         | 2-Phenyl-2-butenal    | 1.19×10 <sup>7</sup>          | 9.76×10 <sup>6</sup>           | 1.06×10 <sup>7</sup>          | 1.48×10 <sup>7</sup>          | 1.03×10 <sup>7</sup>           | 9.57×10 <sup>6</sup>           | 9.57×10 <sup>6</sup>           | 1.01×10 <sup>7</sup>           | 1.42×10 <sup>7</sup>           | 1.30×10 <sup>7</sup>           | 6.72×10 <sup>6</sup>           | 3.16×10 <sup>6</sup>           | 1.16×10 <sup>7</sup>          | 8.75×10 <sup>6</sup>           | 5.52×10 <sup>6</sup>           | 3.08×10 <sup>6</sup>           |
| Esters     |                       | 1.16×10 <sup>8</sup><br>(5.1) | 1.24×10 <sup>8</sup><br>(14.6) | 1.36×10 <sup>8</sup><br>(5.9) | 1.43×10 <sup>8</sup><br>(5.2) | 9.47×10 <sup>7</sup><br>(32.2) | 1.53×10 <sup>8</sup><br>(10.7) | 1.13×10 <sup>8</sup><br>(24.6) | 1.23×10 <sup>8</sup><br>(20.1) | 1.90×10 <sup>8</sup><br>(12.1) | 2.61×10 <sup>8</sup><br>(14.9) | 1.64×10 <sup>8</sup><br>(19.7) | 8.89×10 <sup>7</sup><br>(32.2) | 3.50×10 <sup>8</sup><br>(6.1) | 2.64×10 <sup>8</sup><br>(14.3) | 1.60×10 <sup>8</sup><br>(23.5) | 1.03×10 <sup>8</sup><br>(13.9) |
| Aliphatics |                       |                               |                                |                               |                               |                                |                                |                                |                                |                                |                                |                                |                                |                               |                                |                                |                                |

|    |                                 |                      |                      |                      |                      |                      |                      |                      |                      |                      |                      |                      |                      |                      |                      |                      |                      |
|----|---------------------------------|----------------------|----------------------|----------------------|----------------------|----------------------|----------------------|----------------------|----------------------|----------------------|----------------------|----------------------|----------------------|----------------------|----------------------|----------------------|----------------------|
| 43 | Methyl acetate                  | 2.19×10 <sup>7</sup> | 1.77×10 <sup>7</sup> | 1.37×10 <sup>7</sup> | 2.15×10 <sup>7</sup> | 7.61×10 <sup>6</sup> | 2.32×10 <sup>7</sup> | 1.31×10 <sup>7</sup> | 2.38×10 <sup>7</sup> | 3.73×10 <sup>7</sup> | 3.43×10 <sup>7</sup> | 2.12×10 <sup>7</sup> | 1.37×10 <sup>7</sup> | 5.84×10 <sup>7</sup> | 2.13×10 <sup>7</sup> | 3.03×10 <sup>7</sup> | 2.53×10 <sup>7</sup> |
| 44 | Methyl propenoate               | n.d.                 | 4.00×10 <sup>5</sup> | 3.56×10 <sup>5</sup> | 1.31×10 <sup>5</sup> | 1.16×10 <sup>5</sup> | 1.30×10 <sup>4</sup> | 1.30×10 <sup>4</sup> | 1.30×10 <sup>4</sup> | 1.40×10 <sup>5</sup> |
| 45 | Methyl propanoate               | 3.16×10 <sup>5</sup> | 5.75×10 <sup>5</sup> | 9.46×10 <sup>5</sup> | 1.96×10 <sup>6</sup> | 2.77×10 <sup>5</sup> | 1.50×10 <sup>6</sup> | 8.91×10 <sup>5</sup> | 9.22×10 <sup>5</sup> | 5.77×10 <sup>6</sup> | 7.43×10 <sup>6</sup> | 3.58×10 <sup>6</sup> | 3.04×10 <sup>6</sup> | 6.66×10 <sup>6</sup> | 7.41×10 <sup>6</sup> | 4.52×10 <sup>6</sup> | 1.31×10 <sup>6</sup> |
| 46 | Methyl glycolate                | 2.02×10 <sup>6</sup> | 3.04×10 <sup>6</sup> | 3.01×10 <sup>6</sup> | 2.72×10 <sup>6</sup> | 3.07×10 <sup>6</sup> | 3.23×10 <sup>6</sup> | 3.36×10 <sup>6</sup> | 1.86×10 <sup>6</sup> | 4.80×10 <sup>4</sup> | 3.89×10 <sup>4</sup> | 1.16×10 <sup>4</sup> | 1.06×10 <sup>3</sup> | 5.69×10 <sup>4</sup> | 4.25×10 <sup>4</sup> | 1.49×10 <sup>4</sup> | 1.06×10 <sup>3</sup> |
| 47 | Methyl 2-methylpropenoate       | 2.82×10 <sup>6</sup> | 7.85×10 <sup>5</sup> | 6.13×10 <sup>5</sup> | 8.13×10 <sup>5</sup> | 1.53×10 <sup>6</sup> | 1.49×10 <sup>6</sup> | 1.92×10 <sup>6</sup> | 2.07×10 <sup>6</sup> | 4.97×10 <sup>6</sup> | 1.63×10 <sup>6</sup> | 1.17×10 <sup>6</sup> | 9.01×10 <sup>5</sup> | 4.05×10 <sup>6</sup> | 2.48×10 <sup>6</sup> | 5.92×10 <sup>6</sup> | 1.50×10 <sup>6</sup> |
| 48 | Methyl butanoate                | 3.80×10 <sup>5</sup> | 4.35×10 <sup>5</sup> | 8.77×10 <sup>5</sup> | 2.90×10 <sup>5</sup> | 1.25×10 <sup>5</sup> | 4.31×10 <sup>5</sup> | 3.73×10 <sup>5</sup> | 1.69×10 <sup>5</sup> | 3.07×10 <sup>6</sup> | 1.99×10 <sup>6</sup> | 9.03×10 <sup>5</sup> | 5.45×10 <sup>5</sup> | 2.23×10 <sup>6</sup> | 1.58×10 <sup>6</sup> | 8.98×10 <sup>5</sup> | 5.69×10 <sup>5</sup> |
| 49 | Methyl 2-butenoate              | 1.55×10 <sup>6</sup> | 3.43×10 <sup>6</sup> | 3.21×10 <sup>6</sup> | 1.79×10 <sup>6</sup> | 6.70×10 <sup>5</sup> | 4.33×10 <sup>6</sup> | 2.07×10 <sup>6</sup> | 1.23×10 <sup>6</sup> | 3.92×10 <sup>6</sup> | 6.46×10 <sup>6</sup> | 2.34×10 <sup>6</sup> | 1.72×10 <sup>6</sup> | 5.95×10 <sup>6</sup> | 4.54×10 <sup>6</sup> | 2.92×10 <sup>6</sup> | 1.73×10 <sup>6</sup> |
| 50 | Methyl 2-methylbutanoate        | 3.51×10 <sup>5</sup> | 5.58×10 <sup>5</sup> | 7.00×10 <sup>5</sup> | 4.67×10 <sup>5</sup> | 1.43×10 <sup>5</sup> | 8.78×10 <sup>5</sup> | 4.31×10 <sup>5</sup> | 2.03×10 <sup>5</sup> | 9.80×10 <sup>5</sup> | 1.62×10 <sup>6</sup> | 1.15×10 <sup>6</sup> | 6.24×10 <sup>5</sup> | 2.49×10 <sup>6</sup> | 2.37×10 <sup>6</sup> | 1.06×10 <sup>6</sup> | 5.49×10 <sup>5</sup> |
| 51 | Methyl 3-methylbutanoate        | 1.22×10 <sup>6</sup> | 6.21×10 <sup>6</sup> | 6.94×10 <sup>6</sup> | 3.40×10 <sup>6</sup> | 2.88×10 <sup>5</sup> | 6.32×10 <sup>6</sup> | 3.27×10 <sup>6</sup> | 1.40×10 <sup>6</sup> | 9.57×10 <sup>6</sup> | 2.31×10 <sup>7</sup> | 1.00×10 <sup>7</sup> | 9.11×10 <sup>6</sup> | 2.42×10 <sup>7</sup> | 1.59×10 <sup>7</sup> | 8.86×10 <sup>6</sup> | 5.09×10 <sup>6</sup> |
| 52 | 3-Methylbutyl formate           | 2.02×10 <sup>5</sup> | 9.75×10 <sup>5</sup> | 1.57×10 <sup>6</sup> | 7.73×10 <sup>5</sup> | 4.24×10 <sup>5</sup> | 1.67×10 <sup>6</sup> | 9.95×10 <sup>5</sup> | 1.28×10 <sup>6</sup> | 1.26×10 <sup>6</sup> | 3.02×10 <sup>6</sup> | 2.39×10 <sup>6</sup> | 1.77×10 <sup>6</sup> | 4.11×10 <sup>6</sup> | 4.88×10 <sup>6</sup> | 2.79×10 <sup>6</sup> | 1.03×10 <sup>6</sup> |
| 53 | Butyl acetate                   | 3.62×10 <sup>6</sup> | 2.22×10 <sup>6</sup> | 6.96×10 <sup>6</sup> | 3.79×10 <sup>6</sup> | 1.16×10 <sup>6</sup> | 3.24×10 <sup>6</sup> | 1.45×10 <sup>6</sup> | 1.74×10 <sup>6</sup> | 7.40×10 <sup>6</sup> | 2.45×10 <sup>6</sup> | 7.81×10 <sup>6</sup> | 4.60×10 <sup>6</sup> | 4.01×10 <sup>7</sup> | 3.07×10 <sup>7</sup> | 2.92×10 <sup>5</sup> | 2.44×10 <sup>6</sup> |
| 54 | Methyl pentanoate               | 9.80×10 <sup>4</sup> | 1.36×10 <sup>5</sup> | 1.89×10 <sup>5</sup> | 9.70×10 <sup>4</sup> | 5.06×10 <sup>4</sup> | 1.18×10 <sup>5</sup> | 1.86×10 <sup>5</sup> | 7.61×10 <sup>4</sup> | 3.40×10 <sup>5</sup> | 4.62×10 <sup>5</sup> | 2.95×10 <sup>5</sup> | 1.10×10 <sup>5</sup> | 5.53×10 <sup>5</sup> | 4.83×10 <sup>5</sup> | 2.36×10 <sup>5</sup> | 1.44×10 <sup>5</sup> |
| 55 | Methyl 3-methyl-2-butenoate     | 1.30×10 <sup>6</sup> | 3.99×10 <sup>6</sup> | 3.66×10 <sup>6</sup> | 3.37×10 <sup>6</sup> | 8.27×10 <sup>5</sup> | 2.32×10 <sup>6</sup> | 1.56×10 <sup>6</sup> | 2.05×10 <sup>6</sup> | 6.39×10 <sup>6</sup> | 1.47×10 <sup>7</sup> | 6.08×10 <sup>6</sup> | 4.00×10 <sup>6</sup> | 1.04×10 <sup>7</sup> | 7.13×10 <sup>6</sup> | 3.50×10 <sup>6</sup> | 3.74×10 <sup>6</sup> |
| 56 | Ethyl 3-methylbutanoate         | 1.95×10 <sup>6</sup> | 1.98×10 <sup>6</sup> | 1.61×10 <sup>6</sup> | 1.20×10 <sup>6</sup> | 6.26×10 <sup>5</sup> | 6.91×10 <sup>5</sup> | 7.15×10 <sup>5</sup> | 8.83×10 <sup>5</sup> | 2.66×10 <sup>6</sup> | 3.31×10 <sup>6</sup> | 1.97×10 <sup>6</sup> | 1.19×10 <sup>6</sup> | 4.77×10 <sup>6</sup> | 1.22×10 <sup>6</sup> | 8.78×10 <sup>5</sup> | 1.12×10 <sup>6</sup> |
| 57 | Isoamyl acetate                 | 9.06×10 <sup>6</sup> | 2.87×10 <sup>6</sup> | 3.98×10 <sup>6</sup> | 3.22×10 <sup>6</sup> | 1.41×10 <sup>6</sup> | 4.17×10 <sup>6</sup> | 3.20×10 <sup>6</sup> | 2.06×10 <sup>6</sup> | 1.28×10 <sup>7</sup> | 4.77×10 <sup>6</sup> | 3.51×10 <sup>6</sup> | 2.88×10 <sup>6</sup> | 7.42×10 <sup>6</sup> | 8.18×10 <sup>6</sup> | 3.88×10 <sup>6</sup> | 1.76×10 <sup>6</sup> |
| 58 | Methyl 3-methylpentanoate       | 4.43×10 <sup>5</sup> | 6.46×10 <sup>5</sup> | 6.58×10 <sup>5</sup> | 4.29×10 <sup>5</sup> | 2.99×10 <sup>5</sup> | 2.81×10 <sup>5</sup> | 3.46×10 <sup>5</sup> | 3.33×10 <sup>5</sup> | 3.27×10 <sup>5</sup> | 9.32×10 <sup>5</sup> | 3.77×10 <sup>5</sup> | 4.30×10 <sup>5</sup> | 7.63×10 <sup>5</sup> | 4.74×10 <sup>5</sup> | 1.58×10 <sup>5</sup> | 2.57×10 <sup>5</sup> |
| 59 | 3-Methyl-3-butenyl acetate      | 4.18×10 <sup>6</sup> | 3.45×10 <sup>6</sup> | 3.92×10 <sup>6</sup> | 3.08×10 <sup>6</sup> | 1.47×10 <sup>6</sup> | 5.27×10 <sup>6</sup> | 3.89×10 <sup>6</sup> | 2.00×10 <sup>6</sup> | 7.42×10 <sup>6</sup> | 8.04×10 <sup>6</sup> | 5.51×10 <sup>6</sup> | 3.15×10 <sup>6</sup> | 1.02×10 <sup>7</sup> | 1.19×10 <sup>7</sup> | 7.22×10 <sup>6</sup> | 1.79×10 <sup>6</sup> |
| 60 | Methyl 4-methylpentanoate       | 1.29×10 <sup>6</sup> | 4.95×10 <sup>5</sup> | 2.90×10 <sup>5</sup> | 5.54×10 <sup>5</sup> | 9.41×10 <sup>4</sup> | 2.88×10 <sup>5</sup> | 3.22×10 <sup>5</sup> | 2.12×10 <sup>5</sup> | 7.90×10 <sup>5</sup> | 1.68×10 <sup>6</sup> | 7.35×10 <sup>5</sup> | 4.12×10 <sup>5</sup> | 1.13×10 <sup>6</sup> | 7.48×10 <sup>5</sup> | 3.54×10 <sup>5</sup> | 3.63×10 <sup>5</sup> |
| 61 | Pentyl acetate                  | 2.07×10 <sup>6</sup> | 6.14×10 <sup>5</sup> | 6.61×10 <sup>5</sup> | 4.72×10 <sup>5</sup> | 5.03×10 <sup>5</sup> | 1.54×10 <sup>6</sup> | 1.26×10 <sup>6</sup> | 3.32×10 <sup>5</sup> | 2.77×10 <sup>6</sup> | 1.22×10 <sup>6</sup> | 9.34×10 <sup>5</sup> | 6.23×10 <sup>5</sup> | 3.00×10 <sup>6</sup> | 3.07×10 <sup>6</sup> | 1.41×10 <sup>6</sup> | 4.63×10 <sup>5</sup> |
| 62 | Methyl hexanoate                | 5.99×10 <sup>5</sup> | 9.92×10 <sup>5</sup> | 1.01×10 <sup>6</sup> | 1.13×10 <sup>6</sup> | 1.60×10 <sup>6</sup> | 1.54×10 <sup>6</sup> | 1.08×10 <sup>6</sup> | 6.42×10 <sup>5</sup> | 7.93×10 <sup>5</sup> | 1.59×10 <sup>6</sup> | 1.29×10 <sup>6</sup> | 5.60×10 <sup>5</sup> | 3.23×10 <sup>6</sup> | 2.92×10 <sup>6</sup> | 1.21×10 <sup>6</sup> | 4.37×10 <sup>5</sup> |
| 63 | Ethyl tiglate                   | 1.18×10 <sup>6</sup> | 3.33×10 <sup>6</sup> | 2.64×10 <sup>6</sup> | 3.83×10 <sup>6</sup> | 8.69×10 <sup>5</sup> | 7.88×10 <sup>5</sup> | 2.71×10 <sup>5</sup> | 3.17×10 <sup>6</sup> | 1.36×10 <sup>6</sup> | 6.67×10 <sup>6</sup> | 2.83×10 <sup>6</sup> | 2.49×10 <sup>6</sup> | 6.02×10 <sup>6</sup> | 1.15×10 <sup>6</sup> | 4.21×10 <sup>5</sup> | 2.35×10 <sup>6</sup> |
| 64 | 3-Methyl-2-butenyl acetate      | 6.83×10 <sup>6</sup> | 1.17×10 <sup>7</sup> | 1.45×10 <sup>7</sup> | 9.83×10 <sup>6</sup> | 5.69×10 <sup>6</sup> | 1.80×10 <sup>7</sup> | 1.94×10 <sup>7</sup> | 6.57×10 <sup>6</sup> | 7.39×10 <sup>6</sup> | 2.38×10 <sup>7</sup> | 1.94×10 <sup>7</sup> | 7.40×10 <sup>6</sup> | 3.13×10 <sup>7</sup> | 3.72×10 <sup>7</sup> | 2.86×10 <sup>7</sup> | 6.41×10 <sup>6</sup> |
| 65 | Hexyl formate                   | 9.67×10 <sup>4</sup> | 1.08×10 <sup>6</sup> | 1.80×10 <sup>6</sup> | 1.09×10 <sup>6</sup> | 1.40×10 <sup>6</sup> | 5.03×10 <sup>6</sup> | 3.79×10 <sup>6</sup> | 8.59×10 <sup>5</sup> | 1.42×10 <sup>5</sup> | 1.77×10 <sup>6</sup> | 2.06×10 <sup>6</sup> | 1.04×10 <sup>6</sup> | 6.97×10 <sup>6</sup> | 8.86×10 <sup>6</sup> | 3.69×10 <sup>6</sup> | 7.22×10 <sup>5</sup> |
| 66 | Ethylidene acetate              | 5.06×10 <sup>6</sup> | 6.86×10 <sup>6</sup> | 6.77×10 <sup>6</sup> | 6.78×10 <sup>6</sup> | 3.40×10 <sup>6</sup> | 6.87×10 <sup>6</sup> | 5.60×10 <sup>6</sup> | 4.97×10 <sup>6</sup> | 1.24×10 <sup>6</sup> | 1.57×10 <sup>6</sup> | 8.67×10 <sup>5</sup> | 4.27×10 <sup>5</sup> | 1.54×10 <sup>6</sup> | 1.56×10 <sup>6</sup> | 8.58×10 <sup>5</sup> | 4.50×10 <sup>5</sup> |
| 67 | Methyl 4-methyl-2-oxopentanoate | 1.58×10 <sup>6</sup> | 2.46×10 <sup>6</sup> | 2.28×10 <sup>6</sup> | 2.13×10 <sup>6</sup> | 1.29×10 <sup>6</sup> | 2.40×10 <sup>6</sup> | 1.88×10 <sup>6</sup> | 2.05×10 <sup>6</sup> | 1.78×10 <sup>6</sup> | 3.71×10 <sup>6</sup> | 2.09×10 <sup>6</sup> | 5.29×10 <sup>5</sup> | 2.55×10 <sup>6</sup> | 3.14×10 <sup>6</sup> | 1.68×10 <sup>6</sup> | 8.10×10 <sup>5</sup> |
| 68 | Butyl 2-methyl-2-propenoate     | 1.77×10 <sup>7</sup> | 4.61×10 <sup>6</sup> | 9.71×10 <sup>6</sup> | 1.31×10 <sup>7</sup> | 1.74×10 <sup>7</sup> | 1.76×10 <sup>7</sup> | 6.74×10 <sup>6</sup> | 1.22×10 <sup>7</sup> | 8.87×10 <sup>6</sup> | 2.83×10 <sup>6</sup> | 4.64×10 <sup>6</sup> | 4.06×10 <sup>6</sup> | 1.97×10 <sup>7</sup> | 1.38×10 <sup>7</sup> | 6.54×10 <sup>6</sup> | 4.64×10 <sup>6</sup> |
| 69 | Hexyl acetate                   | 2.61×10 <sup>6</sup> | 1.04×10 <sup>6</sup> | 1.89×10 <sup>6</sup> | 1.39×10 <sup>6</sup> | 2.84×10 <sup>6</sup> | 5.86×10 <sup>6</sup> | 4.88×10 <sup>6</sup> | 1.10×10 <sup>6</sup> | 2.15×10 <sup>6</sup> | 1.17×10 <sup>6</sup> | 1.34×10 <sup>6</sup> | 6.36×10 <sup>5</sup> | 4.86×10 <sup>6</sup> | 6.03×10 <sup>6</sup> | 3.00×10 <sup>6</sup> | 4.24×10 <sup>5</sup> |
| 70 | Isobutyl 3-methyl-2-butenoate   | 7.93×10 <sup>5</sup> | 1.96×10 <sup>6</sup> | 1.40×10 <sup>6</sup> | 2.39×10 <sup>6</sup> | 1.33×10 <sup>6</sup> | 1.32×10 <sup>6</sup> | 1.45×10 <sup>6</sup> | 3.73×10 <sup>6</sup> | 3.70×10 <sup>5</sup> | 1.59×10 <sup>6</sup> | 1.15×10 <sup>6</sup> | 6.79×10 <sup>5</sup> | 1.18×10 <sup>6</sup> | 8.49×10 <sup>5</sup> | 5.01×10 <sup>5</sup> | 7.03×10 <sup>5</sup> |
| 71 | Methyl octanoate                | 7.63×10 <sup>4</sup> | 5.20×10 <sup>5</sup> | 2.13×10 <sup>5</sup> | 1.83×10 <sup>5</sup> | 1.00×10 <sup>6</sup> | 2.12×10 <sup>5</sup> | 3.27×10 <sup>5</sup> | 1.84×10 <sup>5</sup> | 2.19×10 <sup>6</sup> | 4.73×10 <sup>6</sup> | 4.82×10 <sup>6</sup> | 1.66×10 <sup>5</sup> | 2.77×10 <sup>6</sup> | 2.86×10 <sup>6</sup> | 2.56×10 <sup>6</sup> | 2.19×10 <sup>6</sup> |

|                 |                                     |                                |                                |                                |                                |                                |                                |                               |                                |                               |                                |                                |                               |                               |                               |                               |                                |
|-----------------|-------------------------------------|--------------------------------|--------------------------------|--------------------------------|--------------------------------|--------------------------------|--------------------------------|-------------------------------|--------------------------------|-------------------------------|--------------------------------|--------------------------------|-------------------------------|-------------------------------|-------------------------------|-------------------------------|--------------------------------|
| 72              | 3-Methylbutyl 3-methyl-2-butenolate | 1.64×10 <sup>6</sup>           | 1.83×10 <sup>6</sup>           | 1.42×10 <sup>6</sup>           | 2.94×10 <sup>6</sup>           | 5.30×10 <sup>5</sup>           | 3.91×10 <sup>5</sup>           | 2.33×10 <sup>5</sup>          | 3.46×10 <sup>6</sup>           | 1.39×10 <sup>6</sup>          | 1.16×10 <sup>6</sup>           | 5.65×10 <sup>5</sup>           | 6.72×10 <sup>5</sup>          | 3.71×10 <sup>5</sup>          | 2.32×10 <sup>5</sup>          | 9.54×10 <sup>4</sup>          | 6.75×10 <sup>5</sup>           |
| 73              | Methyl decanoate                    | 3.28×10 <sup>4</sup>           | 6.26×10 <sup>4</sup>           | 4.38×10 <sup>4</sup>           | 6.57×10 <sup>4</sup>           | 1.02×10 <sup>5</sup>           | 1.03×10 <sup>5</sup>           | 5.99×10 <sup>4</sup>          | 5.01×10 <sup>4</sup>           | 3.49×10 <sup>6</sup>          | 6.70×10 <sup>6</sup>           | 3.67×10 <sup>6</sup>           | 5.02×10 <sup>4</sup>          | 5.32×10 <sup>6</sup>          | 4.81×10 <sup>6</sup>          | 3.45×10 <sup>6</sup>          | 3.20×10 <sup>6</sup>           |
| 74              | Methyl dodecanoate                  | 6.92×10 <sup>4</sup>           | 5.55×10 <sup>4</sup>           | 7.26×10 <sup>4</sup>           | 5.08×10 <sup>4</sup>           | 1.80×10 <sup>5</sup>           | 1.26×10 <sup>5</sup>           | 8.89×10 <sup>4</sup>          | 1.00×10 <sup>5</sup>           | 9.43×10 <sup>6</sup>          | 1.41×10 <sup>7</sup>           | 1.13×10 <sup>7</sup>           | 7.38×10 <sup>4</sup>          | 1.93×10 <sup>7</sup>          | 1.32×10 <sup>7</sup>          | 9.16×10 <sup>6</sup>          | 1.21×10 <sup>7</sup>           |
| Aromatics       |                                     |                                |                                |                                |                                |                                |                                |                               |                                |                               |                                |                                |                               |                               |                               |                               |                                |
| 75              | Phenyl acetate                      | 1.54×10 <sup>6</sup>           | 1.35×10 <sup>6</sup>           | 1.30×10 <sup>6</sup>           | 1.61×10 <sup>6</sup>           | 1.64×10 <sup>6</sup>           | 1.62×10 <sup>6</sup>           | 1.36×10 <sup>6</sup>          | 1.46×10 <sup>6</sup>           | 2.24×10 <sup>6</sup>          | 3.02×10 <sup>6</sup>           | 1.13×10 <sup>6</sup>           | 5.93×10 <sup>5</sup>          | 2.50×10 <sup>6</sup>          | 2.11×10 <sup>6</sup>          | 1.16×10 <sup>6</sup>          | 4.29×10 <sup>5</sup>           |
| 76              | Benzyl formate                      | 2.35×10 <sup>5</sup>           | 3.46×10 <sup>5</sup>           | 3.81×10 <sup>5</sup>           | 4.89×10 <sup>5</sup>           | 4.25×10 <sup>5</sup>           | 4.60×10 <sup>5</sup>           | 3.99×10 <sup>5</sup>          | 3.79×10 <sup>5</sup>           | 5.66×10 <sup>5</sup>          | 1.17×10 <sup>6</sup>           | 6.81×10 <sup>5</sup>           | 1.28×10 <sup>5</sup>          | 1.05×10 <sup>6</sup>          | 9.76×10 <sup>5</sup>          | 6.15×10 <sup>5</sup>          | 2.31×10 <sup>5</sup>           |
| 77              | Methyl benzoate                     | 1.45×10 <sup>6</sup>           | 3.19×10 <sup>6</sup>           | 2.99×10 <sup>6</sup>           | 3.75×10 <sup>6</sup>           | 2.25×10 <sup>6</sup>           | 1.87×10 <sup>6</sup>           | 1.66×10 <sup>6</sup>          | 3.51×10 <sup>6</sup>           | 2.50×10 <sup>6</sup>          | 7.52×10 <sup>6</sup>           | 3.85×10 <sup>6</sup>           | 2.13×10 <sup>6</sup>          | 5.12×10 <sup>6</sup>          | 2.98×10 <sup>6</sup>          | 1.35×10 <sup>6</sup>          | 1.93×10 <sup>6</sup>           |
| 78              | Methyl phenylacetate                | 6.31×10 <sup>6</sup>           | 7.64×10 <sup>6</sup>           | 6.89×10 <sup>6</sup>           | 8.35×10 <sup>6</sup>           | 6.37×10 <sup>6</sup>           | 6.09×10 <sup>6</sup>           | 5.80×10 <sup>6</sup>          | 7.54×10 <sup>6</sup>           | 7.91×10 <sup>6</sup>          | 1.41×10 <sup>7</sup>           | 5.47×10 <sup>6</sup>           | 2.72×10 <sup>6</sup>          | 9.80×10 <sup>6</sup>          | 5.86×10 <sup>6</sup>          | 3.03×10 <sup>6</sup>          | 3.12×10 <sup>6</sup>           |
| 79              | 2-Phenylethyl formate               | 1.25×10 <sup>6</sup>           | 3.21×10 <sup>6</sup>           | 4.20×10 <sup>6</sup>           | 3.93×10 <sup>6</sup>           | 3.56×10 <sup>6</sup>           | 5.24×10 <sup>6</sup>           | 3.88×10 <sup>6</sup>          | 4.07×10 <sup>6</sup>           | 3.18×10 <sup>6</sup>          | 6.81×10 <sup>6</sup>           | 3.39×10 <sup>6</sup>           | 1.86×10 <sup>6</sup>          | 6.28×10 <sup>6</sup>          | 6.62×10 <sup>6</sup>          | 3.68×10 <sup>6</sup>          | 1.84×10 <sup>6</sup>           |
| 80              | Methyl 2-hydroxybenzoate            | 9.92×10 <sup>6</sup>           | 1.53×10 <sup>7</sup>           | 1.71×10 <sup>7</sup>           | 2.18×10 <sup>7</sup>           | 1.75×10 <sup>7</sup>           | 1.38×10 <sup>7</sup>           | 1.29×10 <sup>7</sup>          | 1.72×10 <sup>7</sup>           | 2.01×10 <sup>7</sup>          | 3.04×10 <sup>7</sup>           | 1.82×10 <sup>7</sup>           | 1.04×10 <sup>7</sup>          | 2.72×10 <sup>7</sup>          | 2.02×10 <sup>7</sup>          | 1.18×10 <sup>7</sup>          | 7.75×10 <sup>6</sup>           |
| 81              | 2-Phenylethyl acetate               | 1.14×10 <sup>6</sup>           | 2.76×10 <sup>6</sup>           | 2.88×10 <sup>6</sup>           | 2.70×10 <sup>6</sup>           | 2.22×10 <sup>6</sup>           | 1.95×10 <sup>6</sup>           | 1.67×10 <sup>6</sup>          | 2.58×10 <sup>6</sup>           | 2.21×10 <sup>6</sup>          | 3.69×10 <sup>6</sup>           | 2.09×10 <sup>6</sup>           | 1.34×10 <sup>6</sup>          | 3.16×10 <sup>6</sup>          | 2.62×10 <sup>6</sup>          | 1.25×10 <sup>6</sup>          | 1.42×10 <sup>6</sup>           |
| 82              | Ethyl 2-hydroxybenzoate             | 1.09×10 <sup>6</sup>           | 3.26×10 <sup>6</sup>           | 3.35×10 <sup>6</sup>           | 5.69×10 <sup>6</sup>           | 2.62×10 <sup>6</sup>           | 1.30×10 <sup>6</sup>           | 5.16×10 <sup>5</sup>          | 4.38×10 <sup>6</sup>           | 2.14×10 <sup>6</sup>          | 5.71×10 <sup>6</sup>           | 3.17×10 <sup>6</sup>           | 2.09×10 <sup>6</sup>          | 3.46×10 <sup>6</sup>          | 1.29×10 <sup>6</sup>          | 5.46×10 <sup>5</sup>          | 1.88×10 <sup>6</sup>           |
| Furan compounds |                                     | 6.12×10 <sup>9</sup><br>(10.1) | 5.22×10 <sup>9</sup><br>(15.5) | 7.91×10 <sup>9</sup><br>(17.2) | 6.77×10 <sup>9</sup><br>(23.7) | 6.21×10 <sup>9</sup><br>(14.8) | 8.04×10 <sup>9</sup><br>(15.8) | 6.88×10 <sup>9</sup><br>(4.7) | 5.40×10 <sup>9</sup><br>(28.6) | 7.42×10 <sup>9</sup><br>(6.3) | 7.20×10 <sup>9</sup><br>(12.7) | 4.86×10 <sup>9</sup><br>(21.9) | 3.31×10 <sup>9</sup><br>(7.1) | 6.66×10 <sup>9</sup><br>(9.6) | 6.58×10 <sup>9</sup><br>(8.6) | 5.18×10 <sup>9</sup><br>(9.2) | 2.97×10 <sup>9</sup><br>(10.2) |
| 83              | Furan                               | 3.95×10 <sup>6</sup>           | 2.57×10 <sup>6</sup>           | 3.86×10 <sup>6</sup>           | 4.50×10 <sup>6</sup>           | 1.62×10 <sup>6</sup>           | 4.59×10 <sup>6</sup>           | 3.19×10 <sup>6</sup>          | 1.93×10 <sup>6</sup>           | 3.79×10 <sup>7</sup>          | 2.98×10 <sup>7</sup>           | 2.70×10 <sup>7</sup>           | 3.64×10 <sup>7</sup>          | 3.43×10 <sup>7</sup>          | 3.03×10 <sup>7</sup>          | 2.09×10 <sup>7</sup>          | 1.81×10 <sup>7</sup>           |
| 84              | 2-Methylfuran                       | 5.41×10 <sup>7</sup>           | 4.11×10 <sup>7</sup>           | 6.06×10 <sup>7</sup>           | 3.50×10 <sup>7</sup>           | 1.65×10 <sup>7</sup>           | 6.70×10 <sup>7</sup>           | 4.59×10 <sup>7</sup>          | 2.69×10 <sup>7</sup>           | 2.31×10 <sup>8</sup>          | 1.81×10 <sup>8</sup>           | 1.91×10 <sup>8</sup>           | 1.94×10 <sup>8</sup>          | 2.52×10 <sup>8</sup>          | 2.01×10 <sup>8</sup>          | 1.72×10 <sup>8</sup>          | 1.12×10 <sup>8</sup>           |
| 85              | Tetrahydrofuran                     | 9.99×10 <sup>7</sup>           | 6.51×10 <sup>7</sup>           | 1.11×10 <sup>8</sup>           | 6.06×10 <sup>7</sup>           | 8.21×10 <sup>6</sup>           | 1.70×10 <sup>8</sup>           | 1.02×10 <sup>8</sup>          | 8.27×10 <sup>7</sup>           | 5.52×10 <sup>7</sup>          | 3.95×10 <sup>7</sup>           | 2.24×10 <sup>7</sup>           | 2.38×10 <sup>7</sup>          | 6.08×10 <sup>7</sup>          | 2.89×10 <sup>7</sup>          | 5.34×10 <sup>7</sup>          | 1.41×10 <sup>7</sup>           |
| 86              | 2,5-Dimethylfuran                   | 2.13×10 <sup>7</sup>           | 3.52×10 <sup>7</sup>           | 4.51×10 <sup>7</sup>           | 1.24×10 <sup>7</sup>           | 3.55×10 <sup>6</sup>           | 5.15×10 <sup>7</sup>           | 2.39×10 <sup>7</sup>          | 7.63×10 <sup>6</sup>           | 1.29×10 <sup>8</sup>          | 8.76×10 <sup>7</sup>           | 5.10×10 <sup>7</sup>           | 4.11×10 <sup>7</sup>          | 8.69×10 <sup>7</sup>          | 7.92×10 <sup>7</sup>          | 4.02×10 <sup>7</sup>          | 1.91×10 <sup>7</sup>           |
| 87              | 2,4-Dimethylfuran                   | 1.39×10 <sup>6</sup>           | 2.49×10 <sup>6</sup>           | 2.93×10 <sup>6</sup>           | 8.94×10 <sup>5</sup>           | 2.35×10 <sup>5</sup>           | 2.81×10 <sup>6</sup>           | 1.36×10 <sup>6</sup>          | 4.18×10 <sup>5</sup>           | 7.68×10 <sup>6</sup>          | 3.74×10 <sup>6</sup>           | 4.71×10 <sup>6</sup>           | 3.47×10 <sup>6</sup>          | 8.13×10 <sup>6</sup>          | 8.18×10 <sup>6</sup>          | 2.52×10 <sup>6</sup>          | 1.43×10 <sup>6</sup>           |
| 88              | 2-Propylfuran                       | 7.49×10 <sup>5</sup>           | 9.27×10 <sup>5</sup>           | 1.06×10 <sup>6</sup>           | 5.16×10 <sup>5</sup>           | 3.11×10 <sup>5</sup>           | 1.31×10 <sup>6</sup>           | 7.04×10 <sup>5</sup>          | 2.35×10 <sup>5</sup>           | 8.00×10 <sup>5</sup>          | 6.94×10 <sup>5</sup>           | 4.60×10 <sup>5</sup>           | 3.54×10 <sup>5</sup>          | 1.22×10 <sup>6</sup>          | 1.15×10 <sup>6</sup>          | 4.02×10 <sup>5</sup>          | 1.45×10 <sup>5</sup>           |
| 89              | 2-Ethyl-5-methylfuran               | 2.62×10 <sup>6</sup>           | 6.93×10 <sup>6</sup>           | 5.41×10 <sup>6</sup>           | 2.72×10 <sup>6</sup>           | 1.42×10 <sup>6</sup>           | 1.26×10 <sup>6</sup>           | 3.86×10 <sup>6</sup>          | 1.25×10 <sup>6</sup>           | 4.70×10 <sup>6</sup>          | 6.49×10 <sup>6</sup>           | 3.36×10 <sup>6</sup>           | 2.43×10 <sup>6</sup>          | 6.62×10 <sup>6</sup>          | 6.56×10 <sup>6</sup>          | 2.64×10 <sup>6</sup>          | 9.09×10 <sup>5</sup>           |
| 90              | 2-Ethyl-5-methyltetrahydrofuran     | 1.20×10 <sup>5</sup>           | 5.84×10 <sup>5</sup>           | 6.43×10 <sup>5</sup>           | 4.13×10 <sup>5</sup>           | 7.85×10 <sup>5</sup>           | 5.08×10 <sup>5</sup>           | 8.91×10 <sup>4</sup>          | 1.91×10 <sup>5</sup>           | 6.75×10 <sup>5</sup>          | 1.71×10 <sup>6</sup>           | 1.11×10 <sup>6</sup>           | 1.01×10 <sup>6</sup>          | 3.26×10 <sup>6</sup>          | 1.56×10 <sup>6</sup>          | 3.03×10 <sup>5</sup>          | 7.85×10 <sup>5</sup>           |
| 91              | 2-Furancarbonitrile                 | 1.87×10 <sup>6</sup>           | 2.04×10 <sup>6</sup>           | 1.96×10 <sup>6</sup>           | 1.88×10 <sup>6</sup>           | 3.77×10 <sup>5</sup>           | 1.43×10 <sup>6</sup>           | 1.48×10 <sup>6</sup>          | 1.50×10 <sup>6</sup>           | 4.72×10 <sup>6</sup>          | 3.88×10 <sup>6</sup>           | 1.65×10 <sup>6</sup>           | 8.43×10 <sup>5</sup>          | 2.69×10 <sup>6</sup>          | 2.63×10 <sup>6</sup>          | 1.45×10 <sup>6</sup>          | 9.15×10 <sup>5</sup>           |
| 92              | Dihydro-2-methyl-3-furanone         | 1.62×10 <sup>8</sup>           | 2.02×10 <sup>8</sup>           | 2.13×10 <sup>8</sup>           | 2.75×10 <sup>8</sup>           | 1.24×10 <sup>8</sup>           | 1.96×10 <sup>8</sup>           | 2.19×10 <sup>8</sup>          | 1.58×10 <sup>8</sup>           | 9.92×10 <sup>7</sup>          | 1.11×10 <sup>8</sup>           | 7.01×10 <sup>7</sup>           | 3.91×10 <sup>7</sup>          | 1.15×10 <sup>8</sup>          | 1.12×10 <sup>8</sup>          | 1.02×10 <sup>8</sup>          | 3.28×10 <sup>7</sup>           |
| 93              | 2,3,5-Trimethylfuran                | 4.14×10 <sup>6</sup>           | 9.81×10 <sup>6</sup>           | 1.07×10 <sup>7</sup>           | 6.07×10 <sup>6</sup>           | 2.47×10 <sup>6</sup>           | 1.12×10 <sup>7</sup>           | 8.27×10 <sup>6</sup>          | 1.37×10 <sup>6</sup>           | 7.02×10 <sup>6</sup>          | 1.03×10 <sup>7</sup>           | 6.13×10 <sup>6</sup>           | 4.24×10 <sup>6</sup>          | 1.03×10 <sup>7</sup>          | 1.07×10 <sup>7</sup>          | 4.18×10 <sup>6</sup>          | 1.67×10 <sup>6</sup>           |
| 94              | 3-Furaldehyde                       | 2.23×10 <sup>6</sup>           | 2.18×10 <sup>6</sup>           | 2.39×10 <sup>6</sup>           | 2.17×10 <sup>6</sup>           | 1.89×10 <sup>6</sup>           | 2.27×10 <sup>6</sup>           | 2.92×10 <sup>6</sup>          | 1.73×10 <sup>6</sup>           | 1.65×10 <sup>6</sup>          | 1.61×10 <sup>6</sup>           | 7.54×10 <sup>5</sup>           | 2.20×10 <sup>5</sup>          | 1.54×10 <sup>6</sup>          | 1.57×10 <sup>6</sup>          | 9.34×10 <sup>5</sup>          | 1.90×10 <sup>5</sup>           |
| 95              | 2-Vinyl-5-methylfuran               | 4.83×10 <sup>7</sup>           | 6.99×10 <sup>7</sup>           | 7.60×10 <sup>7</sup>           | 4.83×10 <sup>7</sup>           | 3.05×10 <sup>6</sup>           | 8.14×10 <sup>7</sup>           | 6.10×10 <sup>7</sup>          | 2.68×10 <sup>7</sup>           | 5.74×10 <sup>7</sup>          | 8.46×10 <sup>7</sup>           | 5.75×10 <sup>7</sup>           | 4.46×10 <sup>7</sup>          | 9.83×10 <sup>7</sup>          | 8.48×10 <sup>7</sup>          | 4.52×10 <sup>7</sup>          | 1.98×10 <sup>7</sup>           |
| 96              | 2-(Methoxymethyl)furan              | 3.72×10 <sup>7</sup>           | 6.15×10 <sup>7</sup>           | 6.23×10 <sup>7</sup>           | 5.27×10 <sup>7</sup>           | 2.25×10 <sup>7</sup>           | 7.18×10 <sup>7</sup>           | 5.07×10 <sup>7</sup>          | 3.06×10 <sup>7</sup>           | 6.25×10 <sup>7</sup>          | 8.54×10 <sup>7</sup>           | 5.54×10 <sup>7</sup>           | 3.31×10 <sup>7</sup>          | 9.41×10 <sup>7</sup>          | 8.41×10 <sup>7</sup>          | 6.12×10 <sup>7</sup>          | 2.75×10 <sup>7</sup>           |
| 97              | 2,3,4-Trimethylfuran                | 1.45×10 <sup>6</sup>           | 6.08×10 <sup>6</sup>           | 3.17×10 <sup>6</sup>           | 2.52×10 <sup>6</sup>           | 4.61×10 <sup>5</sup>           | 5.61×10 <sup>6</sup>           | 2.20×10 <sup>6</sup>          | 4.04×10 <sup>5</sup>           | 2.38×10 <sup>6</sup>          | 3.14×10 <sup>6</sup>           | 1.60×10 <sup>6</sup>           | 1.28×10 <sup>6</sup>          | 2.79×10 <sup>6</sup>          | 2.14×10 <sup>6</sup>          | 1.33×10 <sup>6</sup>          | 5.97×10 <sup>5</sup>           |
| 98              | Furfural                            | 6.51×10 <sup>8</sup>           | 6.05×10 <sup>8</sup>           | 5.87×10 <sup>8</sup>           | 6.20×10 <sup>8</sup>           | 7.08×10 <sup>8</sup>           | 6.11×10 <sup>8</sup>           | 6.88×10 <sup>8</sup>          | 4.70×10 <sup>8</sup>           | 8.75×10 <sup>8</sup>          | 8.00×10 <sup>8</sup>           | 5.88×10 <sup>8</sup>           | 3.65×10 <sup>8</sup>          | 7.19×10 <sup>8</sup>          | 7.11×10 <sup>8</sup>          | 6.46×10 <sup>8</sup>          | 3.85×10 <sup>8</sup>           |

|     |                                        |                      |                      |                      |                      |                      |                      |                      |                      |                      |                      |                      |                      |                      |                      |                      |                      |
|-----|----------------------------------------|----------------------|----------------------|----------------------|----------------------|----------------------|----------------------|----------------------|----------------------|----------------------|----------------------|----------------------|----------------------|----------------------|----------------------|----------------------|----------------------|
| 99  | 2-(2-Propenyl)furan                    | 4.33×10 <sup>7</sup> | 6.91×10 <sup>7</sup> | 6.20×10 <sup>7</sup> | 4.65×10 <sup>7</sup> | 1.66×10 <sup>7</sup> | 7.31×10 <sup>7</sup> | 5.04×10 <sup>7</sup> | 2.50×10 <sup>7</sup> | 4.01×10 <sup>7</sup> | 5.57×10 <sup>7</sup> | 3.36×10 <sup>7</sup> | 2.42×10 <sup>7</sup> | 6.37×10 <sup>7</sup> | 6.05×10 <sup>7</sup> | 3.14×10 <sup>7</sup> | 1.37×10 <sup>7</sup> |
| 100 | 5-Methyl-2(3H)-furanone                | n.d.                 | 7.69×10 <sup>6</sup> | 9.05×10 <sup>6</sup> | 3.50×10 <sup>6</sup> | 1.96×10 <sup>6</sup> | 5.19×10 <sup>6</sup> | 1.05×10 <sup>7</sup> | 3.88×10 <sup>6</sup> | 1.12×10 <sup>6</sup> |
| 101 | 2-Furanmethanol                        | 2.31×10 <sup>9</sup> | 1.06×10 <sup>9</sup> | 3.10×10 <sup>9</sup> | 2.03×10 <sup>9</sup> | 2.10×10 <sup>9</sup> | 3.20×10 <sup>9</sup> | 1.97×10 <sup>9</sup> | 2.08×10 <sup>9</sup> | 1.92×10 <sup>9</sup> | 1.63×10 <sup>9</sup> | 1.06×10 <sup>9</sup> | 7.34×10 <sup>8</sup> | 1.14×10 <sup>9</sup> | 1.43×10 <sup>9</sup> | 9.13×10 <sup>8</sup> | 5.24×10 <sup>8</sup> |
| 102 | 2,5-Diethyltetrahydrofuran             | 2.29×10 <sup>5</sup> | 4.34×10 <sup>5</sup> | 3.65×10 <sup>5</sup> | 3.34×10 <sup>5</sup> | 2.73×10 <sup>4</sup> | 3.71×10 <sup>5</sup> | 2.07×10 <sup>5</sup> | 1.07×10 <sup>5</sup> | 2.68×10 <sup>5</sup> | 7.56×10 <sup>5</sup> | 4.42×10 <sup>5</sup> | 3.31×10 <sup>5</sup> | 1.29×10 <sup>6</sup> | 1.05×10 <sup>6</sup> | 4.85×10 <sup>5</sup> | 8.06×10 <sup>4</sup> |
| 103 | 2-Butylfuran                           | 1.96×10 <sup>6</sup> | 1.22×10 <sup>6</sup> | 1.53×10 <sup>6</sup> | 9.00×10 <sup>5</sup> | 1.03×10 <sup>6</sup> | 2.73×10 <sup>6</sup> | 1.87×10 <sup>6</sup> | 8.26×10 <sup>5</sup> | 4.15×10 <sup>5</sup> | 4.16×10 <sup>5</sup> | 5.04×10 <sup>5</sup> | 1.72×10 <sup>5</sup> | 1.50×10 <sup>6</sup> | 1.32×10 <sup>6</sup> | 4.69×10 <sup>5</sup> | 1.46×10 <sup>5</sup> |
| 104 | Furfuryl formate                       | 1.19×10 <sup>8</sup> | 1.04×10 <sup>8</sup> | 1.23×10 <sup>8</sup> | 1.51×10 <sup>8</sup> | 1.05×10 <sup>8</sup> | 1.46×10 <sup>8</sup> | 1.49×10 <sup>8</sup> | 8.11×10 <sup>7</sup> | 1.52×10 <sup>8</sup> | 1.91×10 <sup>8</sup> | 9.32×10 <sup>7</sup> | 7.20×10 <sup>7</sup> | 1.87×10 <sup>8</sup> | 1.78×10 <sup>8</sup> | 1.45×10 <sup>8</sup> | 8.22×10 <sup>7</sup> |
| 105 | 2-Acetylfuran                          | 1.35×10 <sup>8</sup> | 2.64×10 <sup>8</sup> | 2.65×10 <sup>8</sup> | 2.86×10 <sup>8</sup> | 2.66×10 <sup>8</sup> | 3.05×10 <sup>8</sup> | 2.67×10 <sup>8</sup> | 2.10×10 <sup>8</sup> | 3.13×10 <sup>8</sup> | 3.10×10 <sup>8</sup> | 1.99×10 <sup>8</sup> | 1.06×10 <sup>8</sup> | 3.22×10 <sup>8</sup> | 2.92×10 <sup>8</sup> | 2.47×10 <sup>8</sup> | 1.05×10 <sup>8</sup> |
| 106 | γ-Butyrolactone                        | 5.23×10 <sup>7</sup> | 1.43×10 <sup>8</sup> | 1.83×10 <sup>8</sup> | 2.80×10 <sup>8</sup> | 2.18×10 <sup>8</sup> | 1.75×10 <sup>8</sup> | 2.66×10 <sup>8</sup> | 7.01×10 <sup>7</sup> | 1.12×10 <sup>8</sup> | 1.00×10 <sup>8</sup> | 5.88×10 <sup>7</sup> | 2.84×10 <sup>7</sup> | 8.67×10 <sup>7</sup> | 8.39×10 <sup>7</sup> | 5.23×10 <sup>7</sup> | 3.54×10 <sup>7</sup> |
| 107 | 2,3,4,5-Tetramethylfuran               | 8.70×10 <sup>6</sup> | 1.06×10 <sup>7</sup> | 1.18×10 <sup>7</sup> | 9.08×10 <sup>6</sup> | 3.75×10 <sup>6</sup> | 1.36×10 <sup>7</sup> | 1.13×10 <sup>7</sup> | 6.08×10 <sup>6</sup> | 2.89×10 <sup>6</sup> | 7.77×10 <sup>6</sup> | 4.13×10 <sup>6</sup> | 3.62×10 <sup>6</sup> | 8.83×10 <sup>6</sup> | 8.52×10 <sup>6</sup> | 5.17×10 <sup>6</sup> | 1.69×10 <sup>6</sup> |
| 108 | 3-(1,1-Dimethylethyl)-2,3-dihydrofuran | 2.08×10 <sup>5</sup> | 1.56×10 <sup>5</sup> | 2.03×10 <sup>5</sup> | 2.64×10 <sup>5</sup> | 9.64×10 <sup>4</sup> | 1.13×10 <sup>5</sup> | 1.81×10 <sup>5</sup> | 2.19×10 <sup>5</sup> | 6.34×10 <sup>5</sup> | 4.66×10 <sup>5</sup> | 2.42×10 <sup>5</sup> | 1.38×10 <sup>5</sup> | 4.16×10 <sup>5</sup> | 4.13×10 <sup>5</sup> | 3.00×10 <sup>5</sup> | 1.27×10 <sup>5</sup> |
| 109 | 1-(2-Furyl)-2-propanone                | 1.12×10 <sup>7</sup> | 6.56×10 <sup>7</sup> | 7.19×10 <sup>7</sup> | 4.56×10 <sup>7</sup> | 1.66×10 <sup>7</sup> | 7.99×10 <sup>7</sup> | 4.21×10 <sup>7</sup> | 6.11×10 <sup>6</sup> | 7.33×10 <sup>7</sup> | 7.85×10 <sup>7</sup> | 2.89×10 <sup>7</sup> | 2.31×10 <sup>7</sup> | 7.70×10 <sup>7</sup> | 7.58×10 <sup>7</sup> | 5.26×10 <sup>7</sup> | 1.27×10 <sup>7</sup> |
| 110 | 2-Methyl-5-propenylfuran               | 6.56×10 <sup>7</sup> | 7.83×10 <sup>7</sup> | 8.67×10 <sup>7</sup> | 7.89×10 <sup>7</sup> | 4.07×10 <sup>7</sup> | 1.03×10 <sup>8</sup> | 9.07×10 <sup>7</sup> | 5.52×10 <sup>7</sup> | 2.97×10 <sup>7</sup> | 5.43×10 <sup>7</sup> | 3.17×10 <sup>7</sup> | 2.22×10 <sup>7</sup> | 5.78×10 <sup>7</sup> | 5.66×10 <sup>7</sup> | 3.37×10 <sup>7</sup> | 1.35×10 <sup>7</sup> |
| 111 | Dihydro-5-methyl-2(3H)-furanone        | 8.32×10 <sup>6</sup> | 9.93×10 <sup>6</sup> | 1.07×10 <sup>7</sup> | 1.16×10 <sup>7</sup> | 1.22×10 <sup>7</sup> | 1.11×10 <sup>7</sup> | 1.50×10 <sup>7</sup> | 8.86×10 <sup>6</sup> | 1.27×10 <sup>6</sup> | 2.28×10 <sup>6</sup> | 1.47×10 <sup>6</sup> | 2.00×10 <sup>5</sup> | 1.44×10 <sup>6</sup> | 1.77×10 <sup>6</sup> | 1.07×10 <sup>6</sup> | 3.03×10 <sup>5</sup> |
| 112 | 5-Methylfurfural                       | 5.15×10 <sup>8</sup> | 5.33×10 <sup>8</sup> | 7.10×10 <sup>8</sup> | 6.94×10 <sup>8</sup> | 5.59×10 <sup>8</sup> | 4.92×10 <sup>8</sup> | 7.25×10 <sup>8</sup> | 4.72×10 <sup>8</sup> | 7.37×10 <sup>8</sup> | 6.62×10 <sup>8</sup> | 4.64×10 <sup>8</sup> | 2.53×10 <sup>8</sup> | 6.80×10 <sup>8</sup> | 6.77×10 <sup>8</sup> | 6.06×10 <sup>8</sup> | 2.76×10 <sup>8</sup> |
| 113 | 2-Acetyl-5-methylfuran                 | 2.51×10 <sup>7</sup> | 2.68×10 <sup>7</sup> | 2.78×10 <sup>7</sup> | 2.59×10 <sup>7</sup> | 1.94×10 <sup>7</sup> | 3.18×10 <sup>7</sup> | 3.28×10 <sup>7</sup> | 2.11×10 <sup>7</sup> | 2.88×10 <sup>7</sup> | 3.88×10 <sup>7</sup> | 1.67×10 <sup>7</sup> | 7.92×10 <sup>6</sup> | 3.56×10 <sup>7</sup> | 3.67×10 <sup>7</sup> | 2.35×10 <sup>7</sup> | 8.89×10 <sup>6</sup> |
| 114 | Methyl 2-furoate                       | 1.34×10 <sup>7</sup> | 1.47×10 <sup>7</sup> | 1.10×10 <sup>7</sup> | 1.18×10 <sup>7</sup> | 1.11×10 <sup>7</sup> | 1.26×10 <sup>7</sup> | 1.67×10 <sup>7</sup> | 1.17×10 <sup>7</sup> | 1.56×10 <sup>7</sup> | 2.16×10 <sup>7</sup> | 8.90×10 <sup>6</sup> | 4.44×10 <sup>6</sup> | 1.80×10 <sup>7</sup> | 1.94×10 <sup>7</sup> | 1.11×10 <sup>7</sup> | 4.54×10 <sup>6</sup> |
| 115 | 2-Pentylfuran                          | 8.37×10 <sup>7</sup> | 4.86×10 <sup>7</sup> | 4.86×10 <sup>7</sup> | 5.00×10 <sup>7</sup> | 6.14×10 <sup>7</sup> | 8.47×10 <sup>7</sup> | 6.04×10 <sup>7</sup> | 4.78×10 <sup>7</sup> | 2.51×10 <sup>7</sup> | 1.53×10 <sup>7</sup> | 1.06×10 <sup>7</sup> | 5.79×10 <sup>6</sup> | 3.38×10 <sup>7</sup> | 2.82×10 <sup>7</sup> | 1.13×10 <sup>7</sup> | 4.05×10 <sup>6</sup> |
| 116 | Benzofuran                             | 1.40×10 <sup>7</sup> | 1.52×10 <sup>7</sup> | 2.06×10 <sup>7</sup> | 1.41×10 <sup>7</sup> | 1.05×10 <sup>7</sup> | 1.79×10 <sup>7</sup> | 1.78×10 <sup>7</sup> | 1.23×10 <sup>7</sup> | 2.75×10 <sup>7</sup> | 3.50×10 <sup>7</sup> | 1.94×10 <sup>7</sup> | 1.11×10 <sup>7</sup> | 3.44×10 <sup>7</sup> | 3.32×10 <sup>7</sup> | 2.14×10 <sup>7</sup> | 7.66×10 <sup>6</sup> |
| 117 | Furfuryl acetate                       | 4.01×10 <sup>8</sup> | 4.79×10 <sup>8</sup> | 6.42×10 <sup>8</sup> | 6.10×10 <sup>8</sup> | 5.50×10 <sup>8</sup> | 4.47×10 <sup>8</sup> | 5.71×10 <sup>8</sup> | 4.52×10 <sup>8</sup> | 7.84×10 <sup>8</sup> | 8.96×10 <sup>8</sup> | 7.55×10 <sup>8</sup> | 5.55×10 <sup>8</sup> | 8.89×10 <sup>8</sup> | 8.07×10 <sup>8</sup> | 9.17×10 <sup>8</sup> | 6.56×10 <sup>8</sup> |
| 118 | 2,5-Dihydro-3,5-dimethyl-2-furanone    | 8.06×10 <sup>7</sup> | 9.89×10 <sup>7</sup> | 1.08×10 <sup>8</sup> | 1.15×10 <sup>8</sup> | 1.15×10 <sup>8</sup> | 1.14×10 <sup>8</sup> | 1.10×10 <sup>8</sup> | 8.88×10 <sup>7</sup> | 2.06×10 <sup>7</sup> | 2.58×10 <sup>7</sup> | 1.29×10 <sup>7</sup> | 5.42×10 <sup>6</sup> | 2.08×10 <sup>7</sup> | 2.27×10 <sup>7</sup> | 1.44×10 <sup>7</sup> | 6.07×10 <sup>6</sup> |
| 119 | 1-(2-Furanyl)-1-propanone              | 8.09×10 <sup>7</sup> | 7.14×10 <sup>7</sup> | 8.08×10 <sup>7</sup> | 1.04×10 <sup>8</sup> | 9.99×10 <sup>7</sup> | 7.57×10 <sup>7</sup> | 9.52×10 <sup>7</sup> | 8.49×10 <sup>7</sup> | 9.65×10 <sup>7</sup> | 1.05×10 <sup>8</sup> | 5.68×10 <sup>7</sup> | 2.49×10 <sup>7</sup> | 9.34×10 <sup>7</sup> | 5.33×10 <sup>7</sup> | 7.27×10 <sup>7</sup> | 2.61×10 <sup>7</sup> |
| 120 | 2,2'-Bifuran                           | 4.46×10 <sup>7</sup> | 5.21×10 <sup>7</sup> | 6.61×10 <sup>7</sup> | 5.64×10 <sup>7</sup> | 5.15×10 <sup>7</sup> | 1.25×10 <sup>8</sup> | 7.34×10 <sup>7</sup> | 4.51×10 <sup>7</sup> | 7.83×10 <sup>7</sup> | 9.63×10 <sup>7</sup> | 6.73×10 <sup>7</sup> | 3.60×10 <sup>7</sup> | 8.00×10 <sup>7</sup> | 9.01×10 <sup>7</sup> | 5.85×10 <sup>7</sup> | 2.79×10 <sup>7</sup> |
| 121 | 3,4-Dimethyl-2,5-furandione            | 9.92×10 <sup>7</sup> | 1.02×10 <sup>8</sup> | 1.16×10 <sup>8</sup> | 1.15×10 <sup>8</sup> | 1.29×10 <sup>8</sup> | 1.37×10 <sup>8</sup> | 1.45×10 <sup>8</sup> | 9.09×10 <sup>7</sup> | 2.56×10 <sup>6</sup> | 2.98×10 <sup>6</sup> | 1.18×10 <sup>6</sup> | 6.11×10 <sup>5</sup> | 2.60×10 <sup>6</sup> | 2.60×10 <sup>6</sup> | 2.06×10 <sup>6</sup> | 6.62×10 <sup>5</sup> |
| 122 | 1-(5-Methyl-2-furyl)-2-propanone       | 1.89×10 <sup>6</sup> | 3.31×10 <sup>7</sup> | 3.85×10 <sup>7</sup> | 2.16×10 <sup>7</sup> | 3.37×10 <sup>6</sup> | 4.94×10 <sup>7</sup> | 6.36×10 <sup>6</sup> | 2.05×10 <sup>6</sup> | 4.57×10 <sup>7</sup> | 5.52×10 <sup>7</sup> | 1.91×10 <sup>7</sup> | 1.48×10 <sup>7</sup> | 3.67×10 <sup>7</sup> | 4.49×10 <sup>7</sup> | 2.59×10 <sup>7</sup> | 1.12×10 <sup>7</sup> |
| 123 | 1-(2-Furanyl)-2-butanone               | 3.13×10 <sup>6</sup> | 1.37×10 <sup>7</sup> | 1.45×10 <sup>7</sup> | 9.00×10 <sup>6</sup> | 3.99×10 <sup>6</sup> | 2.01×10 <sup>7</sup> | 8.61×10 <sup>6</sup> | 5.85×10 <sup>5</sup> | 2.23×10 <sup>7</sup> | 2.11×10 <sup>7</sup> | 9.33×10 <sup>6</sup> | 6.07×10 <sup>6</sup> | 1.58×10 <sup>7</sup> | 1.97×10 <sup>7</sup> | 1.33×10 <sup>7</sup> | 4.27×10 <sup>6</sup> |
| 124 | 5-Ethyl-2-furaldehyde                  | 1.06×10 <sup>7</sup> | 1.35×10 <sup>7</sup> | 1.59×10 <sup>7</sup> | 1.43×10 <sup>7</sup> | 1.64×10 <sup>7</sup> | 1.50×10 <sup>7</sup> | 1.98×10 <sup>7</sup> | 1.05×10 <sup>7</sup> | 1.09×10 <sup>7</sup> | 1.38×10 <sup>7</sup> | 7.32×10 <sup>6</sup> | 2.51×10 <sup>6</sup> | 1.32×10 <sup>7</sup> | 1.41×10 <sup>7</sup> | 9.04×10 <sup>6</sup> | 2.67×10 <sup>6</sup> |
| 125 | 1-(2-Furanyl)-3-butanone               | 6.98×10 <sup>7</sup> | 6.10×10 <sup>7</sup> | 7.93×10 <sup>7</sup> | 6.25×10 <sup>7</sup> | 8.88×10 <sup>7</sup> | 1.05×10 <sup>8</sup> | 8.07×10 <sup>7</sup> | 4.84×10 <sup>7</sup> | 6.23×10 <sup>7</sup> | 6.70×10 <sup>7</sup> | 2.78×10 <sup>7</sup> | 1.75×10 <sup>7</sup> | 5.64×10 <sup>7</sup> | 5.38×10 <sup>7</sup> | 4.13×10 <sup>7</sup> | 1.85×10 <sup>7</sup> |
| 126 | 2,2'-Methylenebisfuran                 | 1.70×10 <sup>8</sup> | 1.64×10 <sup>8</sup> | 1.82×10 <sup>8</sup> | 1.74×10 <sup>8</sup> | 1.65×10 <sup>8</sup> | 2.23×10 <sup>8</sup> | 1.97×10 <sup>8</sup> | 1.12×10 <sup>8</sup> | 2.35×10 <sup>8</sup> | 3.11×10 <sup>8</sup> | 2.04×10 <sup>8</sup> | 1.59×10 <sup>8</sup> | 2.83×10 <sup>8</sup> | 2.53×10 <sup>8</sup> | 1.53×10 <sup>8</sup> | 1.39×10 <sup>8</sup> |
| 127 | 3-Acetyl-2,5-dimethylfuran             | 4.28×10 <sup>6</sup> | 4.49×10 <sup>6</sup> | 6.18×10 <sup>6</sup> | 4.75×10 <sup>6</sup> | 4.99×10 <sup>6</sup> | 6.11×10 <sup>6</sup> | 6.28×10 <sup>6</sup> | 4.22×10 <sup>6</sup> | 5.78×10 <sup>6</sup> | 6.95×10 <sup>6</sup> | 3.31×10 <sup>6</sup> | 2.18×10 <sup>6</sup> | 6.64×10 <sup>6</sup> | 5.55×10 <sup>6</sup> | 3.68×10 <sup>6</sup> | 1.97×10 <sup>6</sup> |

|     |                                   |                      |                      |                      |                      |                      |                      |                      |                      |                      |                      |                      |                      |                      |                      |                      |                      |
|-----|-----------------------------------|----------------------|----------------------|----------------------|----------------------|----------------------|----------------------|----------------------|----------------------|----------------------|----------------------|----------------------|----------------------|----------------------|----------------------|----------------------|----------------------|
| 128 | Furfuryl propanoate               | 5.96×10 <sup>7</sup> | 6.58×10 <sup>7</sup> | 6.24×10 <sup>7</sup> | 6.11×10 <sup>7</sup> | 7.08×10 <sup>7</sup> | 8.48×10 <sup>7</sup> | 6.27×10 <sup>7</sup> | 5.86×10 <sup>7</sup> | 9.91×10 <sup>7</sup> | 1.18×10 <sup>8</sup> | 7.75×10 <sup>7</sup> | 3.81×10 <sup>7</sup> | 9.60×10 <sup>7</sup> | 1.26×10 <sup>8</sup> | 8.54×10 <sup>7</sup> | 4.23×10 <sup>7</sup> |
| 129 | 1-(2-Furanyl)-1-butanone          | 9.81×10 <sup>6</sup> | 8.26×10 <sup>6</sup> | 1.36×10 <sup>7</sup> | 7.64×10 <sup>6</sup> | 1.07×10 <sup>7</sup> | 1.22×10 <sup>7</sup> | 1.20×10 <sup>7</sup> | 9.38×10 <sup>6</sup> | 1.13×10 <sup>7</sup> | 1.37×10 <sup>7</sup> | 7.09×10 <sup>6</sup> | 2.74×10 <sup>6</sup> | 1.27×10 <sup>7</sup> | 1.36×10 <sup>7</sup> | 8.00×10 <sup>6</sup> | 2.67×10 <sup>6</sup> |
| 130 | 2-Methylbenzofuran                | 1.88×10 <sup>7</sup> | 2.21×10 <sup>7</sup> | 2.36×10 <sup>7</sup> | 2.18×10 <sup>7</sup> | 2.45×10 <sup>7</sup> | 3.12×10 <sup>7</sup> | 2.58×10 <sup>7</sup> | 1.94×10 <sup>7</sup> | 3.05×10 <sup>7</sup> | 2.58×10 <sup>7</sup> | 1.64×10 <sup>7</sup> | 1.19×10 <sup>7</sup> | 3.29×10 <sup>7</sup> | 3.43×10 <sup>7</sup> | 2.06×10 <sup>7</sup> | 6.69×10 <sup>6</sup> |
| 131 | 2-Methyl-5-propionylfuran         | 3.16×10 <sup>7</sup> | 3.52×10 <sup>7</sup> | 3.89×10 <sup>7</sup> | 3.64×10 <sup>7</sup> | 3.91×10 <sup>7</sup> | 4.99×10 <sup>7</sup> | 4.82×10 <sup>7</sup> | 3.28×10 <sup>7</sup> | 2.05×10 <sup>7</sup> | 2.74×10 <sup>7</sup> | 1.28×10 <sup>7</sup> | 4.85×10 <sup>6</sup> | 2.13×10 <sup>7</sup> | 2.64×10 <sup>7</sup> | 1.53×10 <sup>7</sup> | 5.23×10 <sup>6</sup> |
| 132 | 1-(5-Methyl-2-furanyl)-2-butanone | 1.36×10 <sup>6</sup> | 5.23×10 <sup>6</sup> | 7.02×10 <sup>6</sup> | 6.11×10 <sup>6</sup> | 1.79×10 <sup>6</sup> | 9.50×10 <sup>6</sup> | 1.78×10 <sup>6</sup> | 2.02×10 <sup>6</sup> | 7.51×10 <sup>6</sup> | 1.18×10 <sup>7</sup> | 3.95×10 <sup>6</sup> | 2.56×10 <sup>6</sup> | 6.58×10 <sup>6</sup> | 9.66×10 <sup>6</sup> | 4.01×10 <sup>6</sup> | 1.16×10 <sup>6</sup> |
| 133 | 2-Heptylfuran                     | 1.04×10 <sup>7</sup> | 1.48×10 <sup>7</sup> | 1.53×10 <sup>7</sup> | 1.44×10 <sup>7</sup> | 9.58×10 <sup>6</sup> | 1.79×10 <sup>7</sup> | 1.64×10 <sup>7</sup> | 1.01×10 <sup>7</sup> | 1.35×10 <sup>7</sup> | 1.74×10 <sup>7</sup> | 7.28×10 <sup>6</sup> | 3.99×10 <sup>6</sup> | 1.51×10 <sup>7</sup> | 1.49×10 <sup>7</sup> | 1.06×10 <sup>7</sup> | 3.49×10 <sup>6</sup> |
| 134 | Furfuryl butanoate                | 3.24×10 <sup>6</sup> | 3.29×10 <sup>6</sup> | 3.76×10 <sup>6</sup> | 4.11×10 <sup>6</sup> | 5.57×10 <sup>6</sup> | 4.49×10 <sup>6</sup> | 4.69×10 <sup>6</sup> | 3.34×10 <sup>6</sup> | 5.88×10 <sup>6</sup> | 7.52×10 <sup>6</sup> | 5.91×10 <sup>6</sup> | 1.96×10 <sup>6</sup> | 6.41×10 <sup>6</sup> | 6.71×10 <sup>6</sup> | 3.77×10 <sup>6</sup> | 2.34×10 <sup>6</sup> |
| 135 | 2-(2-Furanylmethyl)-5-methylfuran | 8.46×10 <sup>7</sup> | 8.14×10 <sup>7</sup> | 8.54×10 <sup>7</sup> | 8.92×10 <sup>7</sup> | 8.23×10 <sup>7</sup> | 1.07×10 <sup>8</sup> | 8.58×10 <sup>7</sup> | 6.83×10 <sup>7</sup> | 1.04×10 <sup>8</sup> | 1.11×10 <sup>8</sup> | 7.58×10 <sup>7</sup> | 5.50×10 <sup>7</sup> | 1.03×10 <sup>8</sup> | 9.71×10 <sup>7</sup> | 7.09×10 <sup>7</sup> | 4.20×10 <sup>7</sup> |
| 136 | <i>n</i> -Furfuryl pyrrole        | 2.64×10 <sup>8</sup> | 1.82×10 <sup>8</sup> | 2.34×10 <sup>8</sup> | 1.83×10 <sup>8</sup> | 2.29×10 <sup>8</sup> | 1.91×10 <sup>8</sup> | 2.13×10 <sup>8</sup> | 1.94×10 <sup>8</sup> | 4.62×10 <sup>8</sup> | 3.84×10 <sup>8</sup> | 2.65×10 <sup>8</sup> | 2.14×10 <sup>8</sup> | 4.23×10 <sup>8</sup> | 3.29×10 <sup>8</sup> | 2.26×10 <sup>8</sup> | 1.91×10 <sup>8</sup> |
| 137 | 2-Methyl-3(2-furyl)acrolein       | 1.42×10 <sup>7</sup> | 1.23×10 <sup>7</sup> | 1.26×10 <sup>7</sup> | 1.63×10 <sup>7</sup> | 1.47×10 <sup>7</sup> | 1.60×10 <sup>7</sup> | 1.53×10 <sup>7</sup> | 1.19×10 <sup>7</sup> | 2.15×10 <sup>7</sup> | 1.82×10 <sup>7</sup> | 9.20×10 <sup>6</sup> | 4.43×10 <sup>6</sup> | 1.78×10 <sup>7</sup> | 1.77×10 <sup>7</sup> | 1.04×10 <sup>7</sup> | 3.70×10 <sup>6</sup> |
| 138 | 4-(2-Furanyl)-3-buten-2-one       | 1.67×10 <sup>7</sup> | 1.53×10 <sup>7</sup> | 1.66×10 <sup>7</sup> | 1.99×10 <sup>7</sup> | 2.02×10 <sup>7</sup> | 1.97×10 <sup>7</sup> | 1.99×10 <sup>7</sup> | 1.47×10 <sup>7</sup> | 1.27×10 <sup>7</sup> | 1.27×10 <sup>7</sup> | 6.10×10 <sup>6</sup> | 1.97×10 <sup>6</sup> | 1.20×10 <sup>7</sup> | 1.22×10 <sup>7</sup> | 7.26×10 <sup>6</sup> | 2.68×10 <sup>6</sup> |
| 139 | 4,7-Dimethylbenzofuran            | 1.08×10 <sup>7</sup> | 1.34×10 <sup>7</sup> | 1.36×10 <sup>7</sup> | 1.38×10 <sup>7</sup> | 1.23×10 <sup>7</sup> | 1.45×10 <sup>7</sup> | 1.81×10 <sup>7</sup> | 2.42×10 <sup>6</sup> | 7.31×10 <sup>6</sup> | 7.10×10 <sup>6</sup> | 4.02×10 <sup>6</sup> | 2.16×10 <sup>6</sup> | 6.12×10 <sup>6</sup> | 6.13×10 <sup>6</sup> | 4.99×10 <sup>6</sup> | 1.30×10 <sup>6</sup> |
| 140 | 2-Furyl pyrazine                  | 3.16×10 <sup>7</sup> | 2.94×10 <sup>7</sup> | 3.07×10 <sup>7</sup> | 4.23×10 <sup>7</sup> | 2.96×10 <sup>7</sup> | 2.90×10 <sup>7</sup> | 2.19×10 <sup>7</sup> | 3.40×10 <sup>7</sup> | 1.76×10 <sup>7</sup> | 1.77×10 <sup>7</sup> | 7.89×10 <sup>6</sup> | 3.92×10 <sup>6</sup> | 1.33×10 <sup>7</sup> | 1.22×10 <sup>7</sup> | 6.23×10 <sup>6</sup> | 4.64×10 <sup>6</sup> |
| 141 | 2,2'-Methylenebis(5-methylfuran)  | 6.81×10 <sup>6</sup> | 7.23×10 <sup>6</sup> | 7.22×10 <sup>6</sup> | 7.51×10 <sup>6</sup> | 7.89×10 <sup>6</sup> | 9.29×10 <sup>6</sup> | 9.41×10 <sup>6</sup> | 6.98×10 <sup>6</sup> | 9.58×10 <sup>6</sup> | 7.60×10 <sup>6</sup> | 5.04×10 <sup>6</sup> | 4.01×10 <sup>6</sup> | 7.50×10 <sup>6</sup> | 8.69×10 <sup>6</sup> | 5.35×10 <sup>6</sup> | 2.87×10 <sup>6</sup> |
| 142 | 1-(5-Methylfurfuryl)pyrrole       | 1.28×10 <sup>7</sup> | 1.14×10 <sup>7</sup> | 9.15×10 <sup>6</sup> | 1.14×10 <sup>7</sup> | 9.67×10 <sup>6</sup> | 1.07×10 <sup>7</sup> | 6.48×10 <sup>6</sup> | 1.07×10 <sup>7</sup> | 3.43×10 <sup>7</sup> | 2.55×10 <sup>7</sup> | 1.21×10 <sup>7</sup> | 8.94×10 <sup>6</sup> | 1.91×10 <sup>7</sup> | 1.66×10 <sup>7</sup> | 7.19×10 <sup>6</sup> | 6.98×10 <sup>6</sup> |
| 143 | Difurfuryl ether                  | 7.21×10 <sup>7</sup> | 6.39×10 <sup>7</sup> | 6.38×10 <sup>7</sup> | 7.85×10 <sup>7</sup> | 7.36×10 <sup>7</sup> | 8.59×10 <sup>7</sup> | 7.31×10 <sup>7</sup> | 5.99×10 <sup>7</sup> | 1.20×10 <sup>8</sup> | 1.23×10 <sup>8</sup> | 6.30×10 <sup>7</sup> | 3.22×10 <sup>7</sup> | 1.13×10 <sup>8</sup> | 1.16×10 <sup>8</sup> | 5.96×10 <sup>7</sup> | 3.35×10 <sup>7</sup> |
| 144 | 1-Furfuryl-2-formylpyrrole        | 6.65×10 <sup>5</sup> | 4.39×10 <sup>5</sup> | 1.18×10 <sup>6</sup> | 1.60×10 <sup>6</sup> | 9.39×10 <sup>5</sup> | 1.27×10 <sup>6</sup> | 1.21×10 <sup>6</sup> | 1.09×10 <sup>6</sup> | 1.86×10 <sup>6</sup> | 1.85×10 <sup>6</sup> | 7.47×10 <sup>5</sup> | 5.22×10 <sup>5</sup> | 1.12×10 <sup>6</sup> | 1.41×10 <sup>6</sup> | 8.01×10 <sup>5</sup> | 4.16×10 <sup>5</sup> |
| 145 | 2-Acetyl-1-furfurylpyrrole        | 2.57×10 <sup>6</sup> | 1.86×10 <sup>6</sup> | 1.89×10 <sup>6</sup> | 2.42×10 <sup>6</sup> | 2.76×10 <sup>6</sup> | 3.09×10 <sup>6</sup> | 2.52×10 <sup>6</sup> | 2.52×10 <sup>6</sup> | 6.93×10 <sup>6</sup> | 5.55×10 <sup>6</sup> | 2.87×10 <sup>6</sup> | 1.28×10 <sup>6</sup> | 5.00×10 <sup>6</sup> | 4.89×10 <sup>6</sup> | 2.50×10 <sup>6</sup> | 1.30×10 <sup>6</sup> |

|                   |  |                               |                                |                                |                               |                                |                                |                               |                                |                                |                                 |                                 |                               |                                 |                                |                                |                                |
|-------------------|--|-------------------------------|--------------------------------|--------------------------------|-------------------------------|--------------------------------|--------------------------------|-------------------------------|--------------------------------|--------------------------------|---------------------------------|---------------------------------|-------------------------------|---------------------------------|--------------------------------|--------------------------------|--------------------------------|
| Hydrocarbons      |  | 6.00×10 <sup>7</sup><br>(7.2) | 9.14×10 <sup>7</sup><br>(16.4) | 7.69×10 <sup>7</sup><br>(19.9) | 6.10×10 <sup>7</sup><br>(9.0) | 6.53×10 <sup>7</sup><br>(37.1) | 9.09×10 <sup>7</sup><br>(20.9) | 5.15×10 <sup>7</sup><br>(3.3) | 6.14×10 <sup>7</sup><br>(17.6) | 1.97×10 <sup>8</sup><br>(35.7) | 2.68 ×10 <sup>8</sup><br>(34.0) | 1.93 ×10 <sup>8</sup><br>(32.3) | 3.94×10 <sup>7</sup><br>(5.7) | 2.64 ×10 <sup>8</sup><br>(13.9) | 2.24×10 <sup>8</sup><br>(21.9) | 1.25×10 <sup>8</sup><br>(42.8) | 1.58×10 <sup>8</sup><br>(13.0) |
| <i>Aliphatics</i> |  |                               |                                |                                |                               |                                |                                |                               |                                |                                |                                 |                                 |                               |                                 |                                |                                |                                |

|     |               |                      |                      |                      |                      |                      |                      |                      |                      |                      |                      |                      |                      |                      |                      |                      |                      |
|-----|---------------|----------------------|----------------------|----------------------|----------------------|----------------------|----------------------|----------------------|----------------------|----------------------|----------------------|----------------------|----------------------|----------------------|----------------------|----------------------|----------------------|
| 146 | Nonane        | 4.71×10 <sup>5</sup> | 7.76×10 <sup>5</sup> | 6.76×10 <sup>5</sup> | 7.71×10 <sup>5</sup> | 4.60×10 <sup>5</sup> | 1.76×10 <sup>6</sup> | 6.74×10 <sup>5</sup> | 3.99×10 <sup>5</sup> | 2.29×10 <sup>5</sup> | 2.48×10 <sup>5</sup> | 1.84×10 <sup>5</sup> | 6.60×10 <sup>4</sup> | 2.25×10 <sup>5</sup> | 1.50×10 <sup>5</sup> | 1.11×10 <sup>5</sup> | 4.55×10 <sup>4</sup> |
| 147 | 1,3-Nonadiene | 2.54×10 <sup>6</sup> | 1.97×10 <sup>6</sup> | 1.74×10 <sup>6</sup> | 1.42×10 <sup>6</sup> | 6.77×10 <sup>5</sup> | 2.19×10 <sup>6</sup> | 1.05×10 <sup>6</sup> | 1.25×10 <sup>6</sup> | 1.08×10 <sup>5</sup> | 1.85×10 <sup>5</sup> | 1.30×10 <sup>5</sup> | 9.28×10 <sup>4</sup> | 2.81×10 <sup>5</sup> | 2.36×10 <sup>5</sup> | 8.61×10 <sup>4</sup> | 5.36×10 <sup>4</sup> |
| 148 | Decane        | 8.88×10 <sup>5</sup> | 1.39×10 <sup>6</sup> | 7.46×10 <sup>5</sup> | 6.58×10 <sup>5</sup> | 1.90×10 <sup>6</sup> | 3.18×10 <sup>6</sup> | 1.49×10 <sup>6</sup> | 1.35×10 <sup>6</sup> | 1.50×10 <sup>6</sup> | 2.32×10 <sup>6</sup> | 2.01×10 <sup>6</sup> | 1.26×10 <sup>5</sup> | 1.03×10 <sup>6</sup> | 1.03×10 <sup>6</sup> | 9.53×10 <sup>5</sup> | 7.53×10 <sup>5</sup> |
| 149 | Undecane      | 2.37×10 <sup>6</sup> | 1.20×10 <sup>7</sup> | 7.44×10 <sup>6</sup> | 1.51×10 <sup>6</sup> | 2.07×10 <sup>7</sup> | 3.10×10 <sup>7</sup> | 3.14×10 <sup>6</sup> | 4.00×10 <sup>6</sup> | 2.06×10 <sup>6</sup> | 2.49×10 <sup>6</sup> | 2.58×10 <sup>6</sup> | 4.69×10 <sup>5</sup> | 1.48×10 <sup>6</sup> | 1.78×10 <sup>6</sup> | 1.44×10 <sup>6</sup> | 9.85×10 <sup>5</sup> |
| 150 | 1-Dodecene    | 5.83×10 <sup>5</sup> | 4.90×10 <sup>5</sup> | 1.95×10 <sup>6</sup> | 3.34×10 <sup>5</sup> | 9.28×10 <sup>5</sup> | 5.90×10 <sup>5</sup> | 4.42×10 <sup>5</sup> | 2.30×10 <sup>6</sup> | 3.54×10 <sup>5</sup> | 5.87×10 <sup>5</sup> | 2.58×10 <sup>5</sup> | 1.88×10 <sup>5</sup> | 5.62×10 <sup>5</sup> | 5.25×10 <sup>5</sup> | 2.34×10 <sup>5</sup> | 1.82×10 <sup>5</sup> |
| 151 | Dodecane      | 1.71×10 <sup>6</sup> | 2.37×10 <sup>6</sup> | 1.50×10 <sup>6</sup> | 1.43×10 <sup>6</sup> | 4.78×10 <sup>6</sup> | 4.23×10 <sup>5</sup> | 2.98×10 <sup>6</sup> | 4.57×10 <sup>6</sup> | 5.30×10 <sup>6</sup> | 1.10×10 <sup>7</sup> | 4.32×10 <sup>6</sup> | 2.73×10 <sup>5</sup> | 6.28×10 <sup>6</sup> | 7.55×10 <sup>6</sup> | 6.65×10 <sup>6</sup> | 5.40×10 <sup>6</sup> |
| 152 | Tridecane     | 1.42×10 <sup>6</sup> | 1.75×10 <sup>6</sup> | 1.24×10 <sup>6</sup> | 1.38×10 <sup>6</sup> | 2.03×10 <sup>6</sup> | 1.74×10 <sup>6</sup> | 1.24×10 <sup>6</sup> | 2.40×10 <sup>6</sup> | 3.76×10 <sup>7</sup> | 6.67×10 <sup>7</sup> | 4.77×10 <sup>7</sup> | 4.46×10 <sup>5</sup> | 5.70×10 <sup>7</sup> | 4.81×10 <sup>7</sup> | 3.15×10 <sup>7</sup> | 4.20×10 <sup>7</sup> |
| 153 | Tetradecane   | 2.10×10 <sup>6</sup> | 1.86×10 <sup>6</sup> | 2.19×10 <sup>6</sup> | 1.59×10 <sup>6</sup> | 1.94×10 <sup>6</sup> | 1.41×10 <sup>6</sup> | 1.26×10 <sup>6</sup> | 2.45×10 <sup>6</sup> | 5.10×10 <sup>7</sup> | 5.58×10 <sup>7</sup> | 5.09×10 <sup>7</sup> | 1.69×10 <sup>6</sup> | 7.57×10 <sup>7</sup> | 7.00×10 <sup>7</sup> | 3.37×10 <sup>7</sup> | 5.46×10 <sup>7</sup> |
| 154 | Pentadecane   | 2.11×10 <sup>6</sup> | 1.51×10 <sup>6</sup> | 4.08×10 <sup>5</sup> | 8.46×10 <sup>5</sup> | 9.85×10 <sup>5</sup> | 7.25×10 <sup>5</sup> | 6.49×10 <sup>5</sup> | 1.27×10 <sup>6</sup> | 2.32×10 <sup>6</sup> | 2.77×10 <sup>6</sup> | 1.47×10 <sup>6</sup> | 8.50×10 <sup>5</sup> | 3.10×10 <sup>6</sup> | 1.93×10 <sup>6</sup> | 1.51×10 <sup>6</sup> | 1.55×10 <sup>6</sup> |

|            |                                |                               |                                |                                |                               |                               |                               |                                |                                |                                |                               |                               |                                |                                |                                |                                |                                |
|------------|--------------------------------|-------------------------------|--------------------------------|--------------------------------|-------------------------------|-------------------------------|-------------------------------|--------------------------------|--------------------------------|--------------------------------|-------------------------------|-------------------------------|--------------------------------|--------------------------------|--------------------------------|--------------------------------|--------------------------------|
| 155        | Hexadecane                     | 1.23×10 <sup>6</sup>          | 1.35×10 <sup>6</sup>           | 5.15×10 <sup>5</sup>           | 6.88×10 <sup>4</sup>          | 5.54×10 <sup>5</sup>          | 4.10×10 <sup>5</sup>          | 2.56×10 <sup>5</sup>           | 5.99×10 <sup>5</sup>           | 2.90×10 <sup>6</sup>           | 3.09×10 <sup>6</sup>          | 1.95×10 <sup>6</sup>          | 8.87×10 <sup>5</sup>           | 4.79×10 <sup>6</sup>           | 4.87×10 <sup>6</sup>           | 3.09×10 <sup>6</sup>           | 3.60×10 <sup>6</sup>           |
| Aromatics  |                                |                               |                                |                                |                               |                               |                               |                                |                                |                                |                               |                               |                                |                                |                                |                                |                                |
| 156        | Methylbenzene                  | 5.71×10 <sup>6</sup>          | 1.11×10 <sup>7</sup>           | 1.22×10 <sup>7</sup>           | 6.71×10 <sup>6</sup>          | 2.11×10 <sup>6</sup>          | 1.08×10 <sup>7</sup>          | 6.34×10 <sup>6</sup>           | 2.77×10 <sup>6</sup>           | 2.55×10 <sup>7</sup>           | 2.86×10 <sup>7</sup>          | 1.32×10 <sup>7</sup>          | 1.07×10 <sup>7</sup>           | 2.71×10 <sup>7</sup>           | 2.02×10 <sup>7</sup>           | 6.39×10 <sup>6</sup>           | 6.17×10 <sup>6</sup>           |
| 157        | Ethylbenzene                   | 2.03×10 <sup>6</sup>          | 3.14×10 <sup>6</sup>           | 2.94×10 <sup>6</sup>           | 2.40×10 <sup>6</sup>          | 9.58×10 <sup>5</sup>          | 1.77×10 <sup>6</sup>          | 1.40×10 <sup>6</sup>           | 1.11×10 <sup>6</sup>           | 2.57×10 <sup>6</sup>           | 2.56×10 <sup>6</sup>          | 3.38×10 <sup>6</sup>          | 1.86×10 <sup>6</sup>           | 3.51×10 <sup>6</sup>           | 2.13×10 <sup>6</sup>           | 1.09×10 <sup>6</sup>           | 9.88×10 <sup>5</sup>           |
| 158        | 1,3-Dimethylbenzene            | 5.18×10 <sup>6</sup>          | 5.64×10 <sup>6</sup>           | 6.09×10 <sup>6</sup>           | 4.94×10 <sup>6</sup>          | 3.28×10 <sup>6</sup>          | 4.74×10 <sup>6</sup>          | 4.29×10 <sup>6</sup>           | 2.93×10 <sup>6</sup>           | 7.88×10 <sup>6</sup>           | 1.13×10 <sup>7</sup>          | 8.55×10 <sup>6</sup>          | 5.33×10 <sup>6</sup>           | 9.66×10 <sup>6</sup>           | 6.71×10 <sup>6</sup>           | 4.20×10 <sup>6</sup>           | 3.94×10 <sup>6</sup>           |
| 159        | Phenylethylene                 | 1.86×10 <sup>7</sup>          | 2.54×10 <sup>7</sup>           | 2.16×10 <sup>7</sup>           | 2.02×10 <sup>7</sup>          | 9.01×10 <sup>6</sup>          | 1.66×10 <sup>7</sup>          | 1.20×10 <sup>7</sup>           | 1.57×10 <sup>7</sup>           | 1.78×10 <sup>7</sup>           | 2.88×10 <sup>7</sup>          | 1.52×10 <sup>7</sup>          | 1.25×10 <sup>7</sup>           | 2.38×10 <sup>7</sup>           | 1.64×10 <sup>7</sup>           | 7.34×10 <sup>6</sup>           | 6.68×10 <sup>6</sup>           |
| 160        | 1-Methylethylbenzene           | 2.18×10 <sup>5</sup>          | 3.97×10 <sup>5</sup>           | 2.08×10 <sup>5</sup>           | 1.71×10 <sup>5</sup>          | 6.82×10 <sup>4</sup>          | 1.06×10 <sup>4</sup>          | 2.23×10 <sup>5</sup>           | 1.01×10 <sup>6</sup>           | 1.02×10 <sup>5</sup>           | 1.33×10 <sup>5</sup>          | 1.12×10 <sup>5</sup>          | 6.21×10 <sup>4</sup>           | 1.59×10 <sup>5</sup>           | 2.25×10 <sup>5</sup>           | 7.10×10 <sup>4</sup>           | 3.79×10 <sup>4</sup>           |
| 161        | 1-Ethyl-4-methylbenzene        | 2.09×10 <sup>6</sup>          | 2.59×10 <sup>6</sup>           | 2.76×10 <sup>6</sup>           | 2.21×10 <sup>6</sup>          | 1.87×10 <sup>6</sup>          | 2.41×10 <sup>6</sup>          | 3.19×10 <sup>6</sup>           | 2.30×10 <sup>6</sup>           | 8.72×10 <sup>5</sup>           | 1.39×10 <sup>6</sup>          | 1.63×10 <sup>6</sup>          | 7.82×10 <sup>5</sup>           | 2.15×10 <sup>6</sup>           | 1.64×10 <sup>6</sup>           | 1.27×10 <sup>6</sup>           | 6.14×10 <sup>5</sup>           |
| 162        | 1,2,3-Trimethylbenzene         | 1.95×10 <sup>6</sup>          | 2.34×10 <sup>6</sup>           | 2.23×10 <sup>6</sup>           | 2.49×10 <sup>6</sup>          | 1.85×10 <sup>6</sup>          | 1.34×10 <sup>6</sup>          | 1.76×10 <sup>6</sup>           | 2.27×10 <sup>6</sup>           | 1.24×10 <sup>6</sup>           | 1.47×10 <sup>6</sup>          | 9.97×10 <sup>5</sup>          | 9.55×10 <sup>5</sup>           | 1.60×10 <sup>6</sup>           | 1.62×10 <sup>6</sup>           | 7.20×10 <sup>5</sup>           | 6.80×10 <sup>5</sup>           |
| 163        | 1-Methyl-3-propylbenzene       | 5.72×10 <sup>5</sup>          | 1.58×10 <sup>6</sup>           | 2.22×10 <sup>5</sup>           | 8.20×10 <sup>5</sup>          | 1.22×10 <sup>6</sup>          | 7.95×10 <sup>5</sup>          | 2.01×10 <sup>5</sup>           | 1.35×10 <sup>6</sup>           | 1.67×10 <sup>5</sup>           | 2.85×10 <sup>5</sup>          | 2.46×10 <sup>5</sup>          | 7.50×10 <sup>4</sup>           | 2.70×10 <sup>5</sup>           | 1.87×10 <sup>5</sup>           | 1.18×10 <sup>5</sup>           | 2.46×10 <sup>5</sup>           |
| 164        | Butylbenzene                   | 3.38×10 <sup>6</sup>          | 3.50×10 <sup>6</sup>           | 3.27×10 <sup>6</sup>           | 3.35×10 <sup>6</sup>          | 2.04×10 <sup>6</sup>          | 3.01×10 <sup>6</sup>          | 2.21×10 <sup>6</sup>           | 2.82×10 <sup>6</sup>           | 6.50×10 <sup>5</sup>           | 7.44×10 <sup>5</sup>          | 6.20×10 <sup>5</sup>          | 3.62×10 <sup>5</sup>           | 1.04×10 <sup>6</sup>           | 1.06×10 <sup>6</sup>           | 4.39×10 <sup>5</sup>           | 3.59×10 <sup>5</sup>           |
| 165        | 4-Ethyl-1,2-dimethylbenzene    | 4.03×10 <sup>5</sup>          | 1.60×10 <sup>6</sup>           | 1.10×10 <sup>6</sup>           | 9.20×10 <sup>5</sup>          | 1.22×10 <sup>6</sup>          | 1.15×10 <sup>6</sup>          | 1.18×10 <sup>6</sup>           | 1.34×10 <sup>6</sup>           | 2.60×10 <sup>5</sup>           | 6.88×10 <sup>5</sup>          | 3.95×10 <sup>5</sup>          | 1.74×10 <sup>5</sup>           | 6.38×10 <sup>5</sup>           | 5.25×10 <sup>5</sup>           | 3.62×10 <sup>5</sup>           | 1.85×10 <sup>5</sup>           |
| 166        | 1-Ethyl-2,3-dimethylbenzene    | 5.24×10 <sup>5</sup>          | 1.33×10 <sup>6</sup>           | 7.94×10 <sup>5</sup>           | 1.09×10 <sup>6</sup>          | 7.99×10 <sup>5</sup>          | 6.62×10 <sup>5</sup>          | 7.60×10 <sup>5</sup>           | 9.91×10 <sup>5</sup>           | 1.67×10 <sup>5</sup>           | 4.22×10 <sup>5</sup>          | 2.33×10 <sup>5</sup>          | 1.21×10 <sup>5</sup>           | 3.55×10 <sup>5</sup>           | 2.36×10 <sup>5</sup>           | 1.79×10 <sup>5</sup>           | 1.86×10 <sup>5</sup>           |
| 167        | 1,2,4,5-Tetramethylbenzene     | 4.10×10 <sup>5</sup>          | 3.05×10 <sup>6</sup>           | 2.02×10 <sup>6</sup>           | 2.30×10 <sup>6</sup>          | 2.43×10 <sup>6</sup>          | 6.72×10 <sup>5</sup>          | 1.93×10 <sup>6</sup>           | 2.53×10 <sup>6</sup>           | 3.80×10 <sup>5</sup>           | 1.46×10 <sup>6</sup>          | 8.61×10 <sup>5</sup>          | 4.32×10 <sup>5</sup>           | 1.20×10 <sup>6</sup>           | 5.36×10 <sup>5</sup>           | 5.55×10 <sup>5</sup>           | 3.98×10 <sup>5</sup>           |
| 168        | 1,2,3,4-Tetramethylbenzene     | 7.63×10 <sup>5</sup>          | 1.52×10 <sup>6</sup>           | 1.02×10 <sup>6</sup>           | 1.19×10 <sup>6</sup>          | 1.19×10 <sup>6</sup>          | 9.79×10 <sup>5</sup>          | 1.02×10 <sup>6</sup>           | 1.46×10 <sup>6</sup>           | 5.39×10 <sup>5</sup>           | 8.70×10 <sup>5</sup>          | 4.96×10 <sup>5</sup>          | 3.14×10 <sup>5</sup>           | 8.40×10 <sup>5</sup>           | 5.74×10 <sup>5</sup>           | 3.83×10 <sup>5</sup>           | 2.80×10 <sup>5</sup>           |
| 169        | Pentylbenzene                  | 2.50×10 <sup>6</sup>          | 2.70×10 <sup>6</sup>           | 2.00×10 <sup>6</sup>           | 2.16×10 <sup>6</sup>          | 2.12×10 <sup>6</sup>          | 2.37×10 <sup>6</sup>          | 1.83×10 <sup>6</sup>           | 2.29×10 <sup>6</sup>           | 4.23×10 <sup>5</sup>           | 5.64×10 <sup>5</sup>          | 3.36×10 <sup>5</sup>          | 1.84×10 <sup>5</sup>           | 4.66×10 <sup>5</sup>           | 4.30×10 <sup>5</sup>           | 2.05×10 <sup>5</sup>           | 1.49×10 <sup>5</sup>           |
| 170        | 1-Butylheptylbenzene           | 1.54×10 <sup>5</sup>          | 3.51×10 <sup>4</sup>           | 3.27×10 <sup>4</sup>           | 6.28×10 <sup>3</sup>          | 2.06×10 <sup>5</sup>          | 1.29×10 <sup>5</sup>          | 1.68×10 <sup>4</sup>           | 1.07×10 <sup>4</sup>           | 3.57×10 <sup>7</sup>           | 4.34×10 <sup>7</sup>          | 3.51×10 <sup>7</sup>          | 4.67×10 <sup>5</sup>           | 4.05×10 <sup>7</sup>           | 3.53×10 <sup>7</sup>           | 2.23×10 <sup>7</sup>           | 2.81×10 <sup>7</sup>           |
| Ketones    |                                | 1.46×10 <sup>9</sup><br>(3.3) | 1.78×10 <sup>9</sup><br>(14.2) | 2.23×10 <sup>9</sup><br>(24.4) | 1.76×10 <sup>9</sup><br>(6.0) | 1.52×10 <sup>9</sup><br>(9.5) | 1.78×10 <sup>9</sup><br>(6.7) | 1.87×10 <sup>9</sup><br>(10.4) | 1.25×10 <sup>9</sup><br>(29.9) | 9.81×10 <sup>8</sup><br>(14.7) | 1.02×10 <sup>9</sup><br>(4.4) | 5.19×10 <sup>8</sup><br>(4.2) | 3.81×10 <sup>8</sup><br>(16.4) | 9.43×10 <sup>8</sup><br>(11.6) | 9.29×10 <sup>8</sup><br>(12.7) | 6.35×10 <sup>8</sup><br>(12.8) | 3.45×10 <sup>8</sup><br>(15.0) |
| Aliphatics |                                |                               |                                |                                |                               |                               |                               |                                |                                |                                |                               |                               |                                |                                |                                |                                |                                |
| 171        | 2-Propanone                    | 9.13×10 <sup>7</sup>          | 5.14×10 <sup>7</sup>           | 6.54×10 <sup>7</sup>           | 7.90×10 <sup>7</sup>          | 1.98×10 <sup>7</sup>          | 7.92×10 <sup>7</sup>          | 5.45×10 <sup>7</sup>           | 4.11×10 <sup>7</sup>           | 7.14×10 <sup>7</sup>           | 6.37×10 <sup>7</sup>          | 3.52×10 <sup>7</sup>          | 4.33×10 <sup>7</sup>           | 5.47×10 <sup>7</sup>           | 5.00×10 <sup>7</sup>           | 4.27×10 <sup>7</sup>           | 4.24×10 <sup>7</sup>           |
| 172        | 2-Butanone                     | 4.00×10 <sup>7</sup>          | 3.96×10 <sup>7</sup>           | 3.54×10 <sup>7</sup>           | 3.53×10 <sup>7</sup>          | 1.56×10 <sup>7</sup>          | 4.71×10 <sup>7</sup>          | 3.64×10 <sup>7</sup>           | 2.44×10 <sup>7</sup>           | 7.23×10 <sup>7</sup>           | 6.83×10 <sup>7</sup>          | 4.61×10 <sup>7</sup>          | 4.12×10 <sup>7</sup>           | 3.72×10 <sup>7</sup>           | 4.04×10 <sup>7</sup>           | 4.57×10 <sup>7</sup>           | 3.42×10 <sup>7</sup>           |
| 173        | 2,3-Butanedione (Diacetyl)     | 3.16×10 <sup>7</sup>          | 3.63×10 <sup>7</sup>           | 3.85×10 <sup>7</sup>           | 4.54×10 <sup>7</sup>          | 1.30×10 <sup>7</sup>          | 3.99×10 <sup>7</sup>          | 3.23×10 <sup>7</sup>           | 1.96×10 <sup>7</sup>           | 5.53×10 <sup>7</sup>           | 5.18×10 <sup>7</sup>          | 2.40×10 <sup>7</sup>          | 2.28×10 <sup>7</sup>           | 3.58×10 <sup>7</sup>           | 4.03×10 <sup>7</sup>           | 3.21×10 <sup>7</sup>           | 1.77×10 <sup>7</sup>           |
| 174        | 2-Pentanone                    | 8.43×10 <sup>6</sup>          | 1.05×10 <sup>7</sup>           | 1.30×10 <sup>7</sup>           | 6.14×10 <sup>6</sup>          | 2.12×10 <sup>6</sup>          | 1.30×10 <sup>7</sup>          | 8.03×10 <sup>6</sup>           | 4.33×10 <sup>6</sup>           | 2.78×10 <sup>7</sup>           | 2.39×10 <sup>7</sup>          | 1.55×10 <sup>7</sup>          | 1.09×10 <sup>7</sup>           | 2.43×10 <sup>7</sup>           | 2.17×10 <sup>7</sup>           | 1.32×10 <sup>7</sup>           | 7.49×10 <sup>6</sup>           |
| 175        | 2,3-Pentanedione               | 5.92×10 <sup>7</sup>          | 6.24×10 <sup>7</sup>           | 1.00×10 <sup>8</sup>           | 6.33×10 <sup>7</sup>          | 1.97×10 <sup>7</sup>          | 7.86×10 <sup>7</sup>          | 7.09×10 <sup>7</sup>           | 3.71×10 <sup>7</sup>           | 8.75×10 <sup>7</sup>           | 9.99×10 <sup>7</sup>          | 5.97×10 <sup>7</sup>          | 5.56×10 <sup>7</sup>           | 7.97×10 <sup>7</sup>           | 8.98×10 <sup>7</sup>           | 7.11×10 <sup>7</sup>           | 4.05×10 <sup>7</sup>           |
| 176        | 1-Hydroxy-2-propanone          | 2.52×10 <sup>8</sup>          | 1.91×10 <sup>8</sup>           | 1.62×10 <sup>8</sup>           | 2.75×10 <sup>8</sup>          | 2.41×10 <sup>8</sup>          | 2.56×10 <sup>8</sup>          | 2.95×10 <sup>8</sup>           | 2.60×10 <sup>8</sup>           | 2.51×10 <sup>7</sup>           | 2.55×10 <sup>7</sup>          | 1.41×10 <sup>7</sup>          | 4.11×10 <sup>6</sup>           | 2.44×10 <sup>7</sup>           | 1.98×10 <sup>7</sup>           | 1.65×10 <sup>7</sup>           | 6.15×10 <sup>6</sup>           |
| 177        | 4-Methyl-2-pentanone           | 3.75×10 <sup>5</sup>          | 7.22×10 <sup>5</sup>           | 1.08×10 <sup>6</sup>           | 5.50×10 <sup>5</sup>          | 4.05×10 <sup>5</sup>          | 1.28×10 <sup>6</sup>          | 4.58×10 <sup>5</sup>           | 1.06×10 <sup>5</sup>           | 3.22×10 <sup>6</sup>           | 6.38×10 <sup>6</sup>          | 2.33×10 <sup>6</sup>          | 1.10×10 <sup>6</sup>           | 5.15×10 <sup>6</sup>           | 2.91×10 <sup>6</sup>           | 1.35×10 <sup>6</sup>           | 1.01×10 <sup>6</sup>           |
| 178        | 3-Penten-2-one                 | 1.35×10 <sup>7</sup>          | 1.58×10 <sup>7</sup>           | 1.36×10 <sup>7</sup>           | 1.76×10 <sup>7</sup>          | 5.53×10 <sup>6</sup>          | 1.55×10 <sup>7</sup>          | 1.08×10 <sup>7</sup>           | 1.12×10 <sup>7</sup>           | 1.34×10 <sup>7</sup>           | 1.15×10 <sup>7</sup>          | 9.25×10 <sup>6</sup>          | 4.73×10 <sup>6</sup>           | 9.85×10 <sup>6</sup>           | 1.23×10 <sup>7</sup>           | 7.04×10 <sup>6</sup>           | 5.86×10 <sup>6</sup>           |
| 179        | 3-Hydroxy-2-butanone (Acetoin) | 8.26×10 <sup>7</sup>          | 9.12×10 <sup>7</sup>           | 8.12×10 <sup>7</sup>           | 9.21×10 <sup>7</sup>          | 5.69×10 <sup>7</sup>          | 1.10×10 <sup>8</sup>          | 1.16×10 <sup>8</sup>           | 5.70×10 <sup>7</sup>           | 9.19×10 <sup>6</sup>           | 7.59×10 <sup>6</sup>          | 4.50×10 <sup>6</sup>          | 2.25×10 <sup>6</sup>           | 7.03×10 <sup>6</sup>           | 7.50×10 <sup>6</sup>           | 5.22×10 <sup>6</sup>           | 2.36×10 <sup>6</sup>           |



|     |                           |                      |                      |                      |                      |                      |                      |                      |                      |                      |                      |                      |                      |                      |                      |                      |                      |
|-----|---------------------------|----------------------|----------------------|----------------------|----------------------|----------------------|----------------------|----------------------|----------------------|----------------------|----------------------|----------------------|----------------------|----------------------|----------------------|----------------------|----------------------|
| 180 | 2-Methyl-1-penten-3-one   | 3.91×10 <sup>4</sup> | 6.96×10 <sup>6</sup> | 1.81×10 <sup>6</sup> | 1.62×10 <sup>5</sup> | 3.91×10 <sup>4</sup> | 2.85×10 <sup>6</sup> | 7.18×10 <sup>5</sup> | 3.91×10 <sup>4</sup> | 4.05×10 <sup>6</sup> | 5.58×10 <sup>6</sup> | 2.36×10 <sup>6</sup> | 1.58×10 <sup>6</sup> | 4.45×10 <sup>6</sup> | 4.68×10 <sup>6</sup> | 1.69×10 <sup>6</sup> | 1.13×10 <sup>6</sup> |
| 181 | 2,4-Pentanedione          | 1.55×10 <sup>6</sup> | 2.05×10 <sup>6</sup> | 2.65×10 <sup>6</sup> | 1.84×10 <sup>6</sup> | 6.22×10 <sup>5</sup> | 2.38×10 <sup>6</sup> | 1.74×10 <sup>6</sup> | 9.45×10 <sup>5</sup> | 1.03×10 <sup>6</sup> | 1.19×10 <sup>6</sup> | 4.19×10 <sup>4</sup> | 4.19×10 <sup>4</sup> | 1.36×10 <sup>5</sup> | 1.58×10 <sup>5</sup> | 4.19×10 <sup>4</sup> | 4.19×10 <sup>4</sup> |
| 182 | 3-Hexanone                | 7.92×10 <sup>6</sup> | 1.23×10 <sup>7</sup> | 1.55×10 <sup>7</sup> | 8.94×10 <sup>6</sup> | 3.50×10 <sup>6</sup> | 1.64×10 <sup>7</sup> | 7.41×10 <sup>6</sup> | 4.60×10 <sup>6</sup> | 3.55×10 <sup>7</sup> | 3.88×10 <sup>7</sup> | 2.13×10 <sup>7</sup> | 1.66×10 <sup>7</sup> | 4.02×10 <sup>7</sup> | 3.61×10 <sup>7</sup> | 1.81×10 <sup>7</sup> | 1.15×10 <sup>7</sup> |
| 183 | 2,4-Dimethyl-3-pentanone  | 1.07×10 <sup>7</sup> | 2.71×10 <sup>7</sup> | 2.41×10 <sup>7</sup> | 1.54×10 <sup>7</sup> | 2.81×10 <sup>6</sup> | 2.72×10 <sup>7</sup> | 1.78×10 <sup>7</sup> | 6.69×10 <sup>6</sup> | 3.86×10 <sup>7</sup> | 4.75×10 <sup>7</sup> | 2.34×10 <sup>7</sup> | 1.85×10 <sup>7</sup> | 4.98×10 <sup>7</sup> | 4.73×10 <sup>7</sup> | 3.50×10 <sup>7</sup> | 1.39×10 <sup>7</sup> |
| 184 | 2-Hexanone                | 2.04×10 <sup>6</sup> | 2.47×10 <sup>6</sup> | 2.90×10 <sup>6</sup> | 2.05×10 <sup>6</sup> | 8.66×10 <sup>5</sup> | 2.88×10 <sup>6</sup> | 1.66×10 <sup>6</sup> | 1.07×10 <sup>6</sup> | 5.88×10 <sup>6</sup> | 3.86×10 <sup>6</sup> | 2.38×10 <sup>6</sup> | 2.19×10 <sup>6</sup> | 7.54×10 <sup>6</sup> | 6.26×10 <sup>6</sup> | 3.04×10 <sup>6</sup> | 1.80×10 <sup>6</sup> |
| 185 | 3,4-Hexanedione           | 1.07×10 <sup>7</sup> | 2.11×10 <sup>7</sup> | 2.34×10 <sup>7</sup> | 1.41×10 <sup>7</sup> | 3.99×10 <sup>6</sup> | 2.53×10 <sup>7</sup> | 1.81×10 <sup>7</sup> | 6.01×10 <sup>6</sup> | 2.55×10 <sup>7</sup> | 3.57×10 <sup>7</sup> | 1.89×10 <sup>7</sup> | 1.15×10 <sup>7</sup> | 3.59×10 <sup>7</sup> | 3.27×10 <sup>7</sup> | 2.71×10 <sup>7</sup> | 8.27×10 <sup>6</sup> |
| 186 | 1-Hydroxy-2-butanone      | 4.26×10 <sup>7</sup> | 4.81×10 <sup>7</sup> | 5.16×10 <sup>7</sup> | 5.33×10 <sup>7</sup> | 5.69×10 <sup>7</sup> | 5.95×10 <sup>7</sup> | 6.01×10 <sup>7</sup> | 4.18×10 <sup>7</sup> | 4.37×10 <sup>6</sup> | 3.88×10 <sup>6</sup> | 2.29×10 <sup>6</sup> | 9.23×10 <sup>5</sup> | 3.65×10 <sup>6</sup> | 3.32×10 <sup>6</sup> | 2.70×10 <sup>6</sup> | 6.39×10 <sup>5</sup> |
| 187 | 3-Hydroxy-2-pentanone     | 2.72×10 <sup>7</sup> | 3.85×10 <sup>7</sup> | 4.72×10 <sup>7</sup> | 3.73×10 <sup>7</sup> | 2.89×10 <sup>7</sup> | 5.51×10 <sup>7</sup> | 4.80×10 <sup>7</sup> | 2.32×10 <sup>7</sup> | 5.57×10 <sup>6</sup> | 6.11×10 <sup>6</sup> | 3.25×10 <sup>6</sup> | 1.57×10 <sup>6</sup> | 5.22×10 <sup>6</sup> | 5.37×10 <sup>6</sup> | 4.34×10 <sup>6</sup> | 1.23×10 <sup>6</sup> |
| 188 | 2-Hydroxy-3-pentanone     | 2.41×10 <sup>7</sup> | 3.20×10 <sup>7</sup> | 4.36×10 <sup>7</sup> | 3.54×10 <sup>7</sup> | 2.79×10 <sup>7</sup> | 4.80×10 <sup>7</sup> | 4.51×10 <sup>7</sup> | 1.98×10 <sup>7</sup> | 5.15×10 <sup>6</sup> | 5.58×10 <sup>6</sup> | 1.60×10 <sup>6</sup> | 1.35×10 <sup>6</sup> | 4.38×10 <sup>6</sup> | 4.61×10 <sup>6</sup> | 3.39×10 <sup>6</sup> | 8.25×10 <sup>5</sup> |
| 189 | 3-Hexen-2-one             | 4.82×10 <sup>6</sup> | 6.60×10 <sup>6</sup> | 5.96×10 <sup>6</sup> | 4.91×10 <sup>6</sup> | 1.91×10 <sup>6</sup> | 6.62×10 <sup>6</sup> | 5.11×10 <sup>6</sup> | 3.18×10 <sup>6</sup> | 6.46×10 <sup>6</sup> | 1.42×10 <sup>7</sup> | 4.05×10 <sup>6</sup> | 2.39×10 <sup>6</sup> | 1.60×10 <sup>7</sup> | 8.88×10 <sup>6</sup> | 5.81×10 <sup>6</sup> | 2.35×10 <sup>6</sup> |
| 190 | 3-Hexene-2,5-dione        | 3.27×10 <sup>6</sup> | 8.61×10 <sup>6</sup> | 6.59×10 <sup>6</sup> | 5.47×10 <sup>6</sup> | 7.40×10 <sup>5</sup> | 6.18×10 <sup>6</sup> | 3.09×10 <sup>6</sup> | 2.71×10 <sup>6</sup> | 6.86×10 <sup>6</sup> | 2.00×10 <sup>7</sup> | 6.32×10 <sup>6</sup> | 6.10×10 <sup>6</sup> | 1.15×10 <sup>7</sup> | 1.10×10 <sup>7</sup> | 4.54×10 <sup>6</sup> | 3.06×10 <sup>6</sup> |
| 191 | 4-Methyl-2-hexanone       | 7.90×10 <sup>5</sup> | 1.09×10 <sup>6</sup> | 1.45×10 <sup>6</sup> | 9.13×10 <sup>5</sup> | 3.27×10 <sup>6</sup> | 1.06×10 <sup>6</sup> | 9.80×10 <sup>5</sup> | 4.52×10 <sup>5</sup> | 1.94×10 <sup>6</sup> | 3.06×10 <sup>6</sup> | 1.59×10 <sup>6</sup> | 9.81×10 <sup>5</sup> | 2.58×10 <sup>6</sup> | 2.34×10 <sup>6</sup> | 1.09×10 <sup>6</sup> | 1.05×10 <sup>6</sup> |
| 192 | 4-Heptanone               | 3.04×10 <sup>5</sup> | 5.48×10 <sup>5</sup> | 4.19×10 <sup>5</sup> | 3.01×10 <sup>5</sup> | 1.76×10 <sup>5</sup> | 4.36×10 <sup>5</sup> | 3.29×10 <sup>5</sup> | 2.43×10 <sup>5</sup> | 8.53×10 <sup>5</sup> | 1.22×10 <sup>6</sup> | 6.87×10 <sup>5</sup> | 3.35×10 <sup>5</sup> | 1.15×10 <sup>6</sup> | 1.16×10 <sup>6</sup> | 5.44×10 <sup>5</sup> | 2.72×10 <sup>5</sup> |
| 193 | 1-(Acetyloxy)-2-propanone | 2.78×10 <sup>8</sup> | 5.84×10 <sup>8</sup> | 9.64×10 <sup>8</sup> | 3.92×10 <sup>8</sup> | 4.75×10 <sup>8</sup> | 2.70×10 <sup>8</sup> | 4.56×10 <sup>8</sup> | 2.59×10 <sup>8</sup> | 2.22×10 <sup>8</sup> | 1.72×10 <sup>8</sup> | 5.07×10 <sup>7</sup> | 5.14×10 <sup>7</sup> | 1.66×10 <sup>8</sup> | 1.73×10 <sup>8</sup> | 1.15×10 <sup>8</sup> | 6.08×10 <sup>7</sup> |
| 194 | 3-Heptanone               | 1.41×10 <sup>6</sup> | 9.72×10 <sup>5</sup> | 1.17×10 <sup>6</sup> | 9.23×10 <sup>5</sup> | 4.71×10 <sup>5</sup> | 1.18×10 <sup>6</sup> | 7.97×10 <sup>5</sup> | 8.38×10 <sup>5</sup> | 1.68×10 <sup>6</sup> | 1.97×10 <sup>6</sup> | 1.30×10 <sup>6</sup> | 7.59×10 <sup>5</sup> | 3.24×10 <sup>6</sup> | 2.84×10 <sup>6</sup> | 1.31×10 <sup>6</sup> | 7.46×10 <sup>5</sup> |
| 195 | 2-Heptanone               | 9.15×10 <sup>6</sup> | 9.04×10 <sup>6</sup> | 1.17×10 <sup>7</sup> | 8.48×10 <sup>6</sup> | 7.79×10 <sup>6</sup> | 1.98×10 <sup>7</sup> | 1.06×10 <sup>7</sup> | 5.86×10 <sup>6</sup> | 1.43×10 <sup>7</sup> | 1.91×10 <sup>7</sup> | 1.54×10 <sup>7</sup> | 7.16×10 <sup>6</sup> | 5.24×10 <sup>7</sup> | 3.99×10 <sup>7</sup> | 1.56×10 <sup>7</sup> | 7.45×10 <sup>6</sup> |
| 196 | 3-Hepten-2-one            | 1.24×10 <sup>6</sup> | 1.99×10 <sup>6</sup> | 1.95×10 <sup>6</sup> | 1.58×10 <sup>6</sup> | 6.66×10 <sup>5</sup> | 1.90×10 <sup>6</sup> | 1.56×10 <sup>6</sup> | 9.19×10 <sup>5</sup> | 1.74×10 <sup>6</sup> | 3.14×10 <sup>6</sup> | 1.45×10 <sup>6</sup> | 7.70×10 <sup>5</sup> | 2.67×10 <sup>6</sup> | 2.49×10 <sup>6</sup> | 1.44×10 <sup>6</sup> | 7.77×10 <sup>5</sup> |
| 197 | 2,5-Hexanedione           | 3.81×10 <sup>7</sup> | 5.17×10 <sup>7</sup> | 5.87×10 <sup>7</sup> | 5.61×10 <sup>7</sup> | 6.94×10 <sup>7</sup> | 6.46×10 <sup>7</sup> | 7.10×10 <sup>7</sup> | 3.87×10 <sup>7</sup> | 3.49×10 <sup>6</sup> | 3.79×10 <sup>6</sup> | 2.41×10 <sup>6</sup> | 9.37×10 <sup>5</sup> | 4.08×10 <sup>6</sup> | 4.04×10 <sup>6</sup> | 2.80×10 <sup>6</sup> | 9.71×10 <sup>5</sup> |
| 198 | 6-Methyl-3-heptanone      | 1.55×10 <sup>6</sup> | 1.06×10 <sup>6</sup> | 1.16×10 <sup>6</sup> | 1.10×10 <sup>6</sup> | 3.25×10 <sup>5</sup> | 7.63×10 <sup>5</sup> | 1.05×10 <sup>6</sup> | 7.94×10 <sup>5</sup> | 1.11×10 <sup>6</sup> | 2.22×10 <sup>6</sup> | 1.16×10 <sup>6</sup> | 9.74×10 <sup>5</sup> | 1.84×10 <sup>6</sup> | 1.67×10 <sup>6</sup> | 6.91×10 <sup>5</sup> | 6.78×10 <sup>5</sup> |
| 199 | 6-Methyl-2-heptanone      | 2.23×10 <sup>6</sup> | 2.36×10 <sup>6</sup> | 2.43×10 <sup>6</sup> | 1.92×10 <sup>6</sup> | 6.82×10 <sup>5</sup> | 1.86×10 <sup>6</sup> | 1.27×10 <sup>6</sup> | 1.59×10 <sup>6</sup> | 2.88×10 <sup>6</sup> | 3.89×10 <sup>6</sup> | 2.43×10 <sup>6</sup> | 1.78×10 <sup>6</sup> | 3.64×10 <sup>6</sup> | 3.17×10 <sup>6</sup> | 1.62×10 <sup>6</sup> | 1.61×10 <sup>6</sup> |
| 200 | 5-Methyl-2-heptanone      | 5.77×10 <sup>5</sup> | 5.90×10 <sup>5</sup> | 5.20×10 <sup>5</sup> | 2.31×10 <sup>6</sup> | 2.01×10 <sup>5</sup> | 4.79×10 <sup>5</sup> | 4.73×10 <sup>5</sup> | 4.39×10 <sup>5</sup> | 7.93×10 <sup>5</sup> | 9.26×10 <sup>5</sup> | 5.13×10 <sup>5</sup> | 3.94×10 <sup>5</sup> | 7.77×10 <sup>5</sup> | 6.66×10 <sup>5</sup> | 3.17×10 <sup>5</sup> | 3.42×10 <sup>5</sup> |
| 201 | 1-Octen-3-one             | 3.18×10 <sup>6</sup> | 1.31×10 <sup>6</sup> | 1.43×10 <sup>6</sup> | 2.07×10 <sup>6</sup> | 1.82×10 <sup>6</sup> | 1.75×10 <sup>6</sup> | 1.60×10 <sup>6</sup> | 2.60×10 <sup>6</sup> | 3.19×10 <sup>6</sup> | 6.67×10 <sup>5</sup> | 2.11×10 <sup>6</sup> | 6.74×10 <sup>5</sup> | 3.86×10 <sup>6</sup> | 2.66×10 <sup>6</sup> | 1.28×10 <sup>6</sup> | 1.14×10 <sup>6</sup> |
| 202 | 2,3-Octanedione           | 1.15×10 <sup>7</sup> | 6.31×10 <sup>6</sup> | 5.33×10 <sup>6</sup> | 8.74×10 <sup>6</sup> | 6.57×10 <sup>6</sup> | 5.29×10 <sup>6</sup> | 9.27×10 <sup>6</sup> | 1.02×10 <sup>7</sup> | 1.26×10 <sup>7</sup> | 9.43×10 <sup>6</sup> | 9.88×10 <sup>6</sup> | 3.60×10 <sup>6</sup> | 1.45×10 <sup>7</sup> | 1.12×10 <sup>7</sup> | 6.89×10 <sup>6</sup> | 5.50×10 <sup>6</sup> |
| 203 | 6-Methyl-5-hepten-2-one   | 4.97×10 <sup>6</sup> | 9.68×10 <sup>6</sup> | 1.22×10 <sup>7</sup> | 1.31×10 <sup>7</sup> | 7.29×10 <sup>6</sup> | 4.75×10 <sup>6</sup> | 5.86×10 <sup>6</sup> | 7.17×10 <sup>6</sup> | 3.45×10 <sup>6</sup> | 9.11×10 <sup>6</sup> | 4.95×10 <sup>6</sup> | 2.34×10 <sup>6</sup> | 5.02×10 <sup>6</sup> | 8.21×10 <sup>6</sup> | 3.50×10 <sup>6</sup> | 1.97×10 <sup>6</sup> |
| 204 | 2-Octanone                | 3.20×10 <sup>6</sup> | 4.57×10 <sup>6</sup> | 4.69×10 <sup>6</sup> | 8.01×10 <sup>6</sup> | 6.09×10 <sup>6</sup> | 9.19×10 <sup>6</sup> | 3.64×10 <sup>6</sup> | 6.37×10 <sup>6</sup> | 6.26×10 <sup>6</sup> | 1.11×10 <sup>7</sup> | 4.34×10 <sup>6</sup> | 4.55×10 <sup>6</sup> | 1.33×10 <sup>7</sup> | 1.09×10 <sup>7</sup> | 5.13×10 <sup>6</sup> | 3.68×10 <sup>6</sup> |
| 205 | 3-Octen-2-one             | 3.42×10 <sup>6</sup> | 2.33×10 <sup>6</sup> | 2.69×10 <sup>6</sup> | 2.52×10 <sup>6</sup> | 4.71×10 <sup>6</sup> | 4.63×10 <sup>6</sup> | 4.03×10 <sup>6</sup> | 2.26×10 <sup>6</sup> | 2.18×10 <sup>6</sup> | 2.75×10 <sup>6</sup> | 2.54×10 <sup>6</sup> | 7.90×10 <sup>5</sup> | 5.65×10 <sup>6</sup> | 5.90×10 <sup>6</sup> | 2.41×10 <sup>6</sup> | 9.18×10 <sup>5</sup> |
| 206 | 2-Nonanone                | 9.48×10 <sup>5</sup> | 1.28×10 <sup>6</sup> | 1.37×10 <sup>6</sup> | 1.31×10 <sup>6</sup> | 1.17×10 <sup>6</sup> | 1.17×10 <sup>6</sup> | 9.96×10 <sup>5</sup> | 1.46×10 <sup>6</sup> | 1.09×10 <sup>6</sup> | 1.34×10 <sup>6</sup> | 1.15×10 <sup>6</sup> | 6.92×10 <sup>5</sup> | 1.42×10 <sup>6</sup> | 1.27×10 <sup>6</sup> | 6.26×10 <sup>5</sup> | 8.36×10 <sup>5</sup> |
| 207 | 3-Nonen-2-one             | 6.76×10 <sup>5</sup> | 7.93×10 <sup>5</sup> | 4.31×10 <sup>5</sup> | 1.18×10 <sup>6</sup> | 1.20×10 <sup>6</sup> | 1.32×10 <sup>6</sup> | 9.83×10 <sup>5</sup> | 9.28×10 <sup>5</sup> | 1.37×10 <sup>6</sup> | 1.11×10 <sup>6</sup> | 7.40×10 <sup>5</sup> | 3.97×10 <sup>5</sup> | 1.46×10 <sup>6</sup> | 1.56×10 <sup>6</sup> | 7.77×10 <sup>5</sup> | 3.53×10 <sup>5</sup> |

Cyclics

|                  |                                           |                               |                                |                                |                                |                                |                                |                               |                                |                               |                                |                                |                                |                                |                               |                                |                                |
|------------------|-------------------------------------------|-------------------------------|--------------------------------|--------------------------------|--------------------------------|--------------------------------|--------------------------------|-------------------------------|--------------------------------|-------------------------------|--------------------------------|--------------------------------|--------------------------------|--------------------------------|-------------------------------|--------------------------------|--------------------------------|
| 208              | 2-Cyclopenten-1-one                       | 2.00×10 <sup>7</sup>          | 2.48×10 <sup>7</sup>           | 2.38×10 <sup>7</sup>           | 2.48×10 <sup>7</sup>           | 1.64×10 <sup>7</sup>           | 2.47×10 <sup>7</sup>           | 2.31×10 <sup>7</sup>          | 1.68×10 <sup>7</sup>           | 8.93×10 <sup>6</sup>          | 8.39×10 <sup>6</sup>           | 3.83×10 <sup>6</sup>           | 2.39×10 <sup>6</sup>           | 6.54×10 <sup>6</sup>           | 6.54×10 <sup>6</sup>          | 3.95×10 <sup>6</sup>           | 2.55×10 <sup>6</sup>           |
| 209              | Cyclohexanone                             | 3.21×10 <sup>6</sup>          | 4.04×10 <sup>6</sup>           | 3.86×10 <sup>6</sup>           | 3.32×10 <sup>6</sup>           | 1.56×10 <sup>6</sup>           | 4.10×10 <sup>6</sup>           | 3.29×10 <sup>6</sup>          | 2.39×10 <sup>6</sup>           | 5.30×10 <sup>6</sup>          | 5.71×10 <sup>6</sup>           | 3.57×10 <sup>6</sup>           | 1.05×10 <sup>6</sup>           | 3.76×10 <sup>6</sup>           | 3.62×10 <sup>6</sup>          | 2.20×10 <sup>6</sup>           | 6.63×10 <sup>5</sup>           |
| 210              | 4-Cyclopentene-1,3-dione                  | 1.01×10 <sup>7</sup>          | 1.24×10 <sup>7</sup>           | 1.82×10 <sup>7</sup>           | 3.63×10 <sup>7</sup>           | 1.03×10 <sup>7</sup>           | 8.10×10 <sup>6</sup>           | 1.01×10 <sup>7</sup>          | 2.12×10 <sup>7</sup>           | 9.52×10 <sup>6</sup>          | 7.47×10 <sup>6</sup>           | 4.18×10 <sup>6</sup>           | 3.03×10 <sup>6</sup>           | 5.77×10 <sup>6</sup>           | 4.90×10 <sup>6</sup>          | 3.41×10 <sup>6</sup>           | 2.91×10 <sup>6</sup>           |
| 211              | 2-Methyl-2-cyclopenten-1-one              | 3.39×10 <sup>7</sup>          | 4.46×10 <sup>7</sup>           | 3.05×10 <sup>7</sup>           | 4.24×10 <sup>7</sup>           | 2.91×10 <sup>7</sup>           | 5.27×10 <sup>7</sup>           | 4.73×10 <sup>7</sup>          | 2.94×10 <sup>7</sup>           | 2.32×10 <sup>7</sup>          | 2.54×10 <sup>7</sup>           | 1.20×10 <sup>7</sup>           | 6.22×10 <sup>6</sup>           | 2.19×10 <sup>7</sup>           | 2.23×10 <sup>7</sup>          | 1.52×10 <sup>7</sup>           | 6.36×10 <sup>6</sup>           |
| 212              | 2-Cyclohexen-1-one                        | 1.63×10 <sup>7</sup>          | 1.65×10 <sup>7</sup>           | 1.68×10 <sup>7</sup>           | 1.59×10 <sup>7</sup>           | 1.13×10 <sup>7</sup>           | 2.05×10 <sup>7</sup>           | 1.95×10 <sup>7</sup>          | 1.15×10 <sup>7</sup>           | 7.68×10 <sup>6</sup>          | 7.93×10 <sup>6</sup>           | 3.90×10 <sup>6</sup>           | 1.97×10 <sup>6</sup>           | 7.63×10 <sup>6</sup>           | 7.92×10 <sup>6</sup>          | 5.25×10 <sup>6</sup>           | 1.98×10 <sup>6</sup>           |
| 213              | 5-Ethylcyclopent-2-en-1-one               | 1.52×10 <sup>6</sup>          | 1.60×10 <sup>6</sup>           | 1.69×10 <sup>6</sup>           | 1.55×10 <sup>6</sup>           | 9.72×10 <sup>5</sup>           | 1.83×10 <sup>6</sup>           | 1.76×10 <sup>6</sup>          | 1.23×10 <sup>6</sup>           | 8.64×10 <sup>5</sup>          | 1.29×10 <sup>6</sup>           | 5.72×10 <sup>5</sup>           | 2.53×10 <sup>5</sup>           | 1.10×10 <sup>6</sup>           | 1.17×10 <sup>6</sup>          | 7.47×10 <sup>5</sup>           | 1.77×10 <sup>5</sup>           |
| 214              | 6-Methylenebicyclo[3.2.0]hept-3-en-2-one  | 1.42×10 <sup>6</sup>          | 1.54×10 <sup>6</sup>           | 1.31×10 <sup>6</sup>           | 1.24×10 <sup>6</sup>           | 7.24×10 <sup>5</sup>           | 1.66×10 <sup>6</sup>           | 1.20×10 <sup>6</sup>          | 1.00×10 <sup>6</sup>           | 1.08×10 <sup>6</sup>          | 1.66×10 <sup>6</sup>           | 6.77×10 <sup>5</sup>           | 4.39×10 <sup>5</sup>           | 1.16×10 <sup>6</sup>           | 1.20×10 <sup>6</sup>          | 6.96×10 <sup>5</sup>           | 3.01×10 <sup>5</sup>           |
| 215              | 3-Methyl-2-cyclohexen-1-one               | 1.39×10 <sup>7</sup>          | 1.56×10 <sup>7</sup>           | 1.66×10 <sup>7</sup>           | 1.47×10 <sup>7</sup>           | 1.13×10 <sup>7</sup>           | 2.07×10 <sup>7</sup>           | 1.82×10 <sup>7</sup>          | 1.18×10 <sup>7</sup>           | 1.17×10 <sup>7</sup>          | 1.81×10 <sup>7</sup>           | 9.49×10 <sup>6</sup>           | 4.14×10 <sup>6</sup>           | 1.68×10 <sup>7</sup>           | 1.92×10 <sup>7</sup>          | 1.34×10 <sup>7</sup>           | 4.07×10 <sup>6</sup>           |
| 216              | 2,2,6-Trimethylcyclohexanone              | 6.13×10 <sup>5</sup>          | 8.18×10 <sup>5</sup>           | 7.78×10 <sup>5</sup>           | 7.67×10 <sup>5</sup>           | 5.22×10 <sup>5</sup>           | 6.21×10 <sup>5</sup>           | 3.86×10 <sup>5</sup>          | 8.58×10 <sup>5</sup>           | 1.05×10 <sup>6</sup>          | 1.63×10 <sup>6</sup>           | 9.42×10 <sup>5</sup>           | 7.36×10 <sup>5</sup>           | 1.36×10 <sup>6</sup>           | 1.07×10 <sup>6</sup>          | 5.33×10 <sup>5</sup>           | 5.85×10 <sup>5</sup>           |
| 217              | 2-Cyclohexene-1,4-dione                   | 1.97×10 <sup>7</sup>          | 2.96×10 <sup>7</sup>           | 3.44×10 <sup>7</sup>           | 3.38×10 <sup>7</sup>           | 3.88×10 <sup>7</sup>           | 3.28×10 <sup>7</sup>           | 3.97×10 <sup>7</sup>          | 2.34×10 <sup>7</sup>           | 1.76×10 <sup>7</sup>          | 1.75×10 <sup>7</sup>           | 7.65×10 <sup>6</sup>           | 3.88×10 <sup>6</sup>           | 1.55×10 <sup>7</sup>           | 1.42×10 <sup>7</sup>          | 1.13×10 <sup>7</sup>           | 3.65×10 <sup>6</sup>           |
| 218              | 3,5-Dimethyl-2-cyclohexen-1-one           | 3.48×10 <sup>6</sup>          | 4.30×10 <sup>6</sup>           | 6.56×10 <sup>6</sup>           | 6.45×10 <sup>6</sup>           | 5.31×10 <sup>6</sup>           | 8.27×10 <sup>6</sup>           | 6.59×10 <sup>6</sup>          | 5.50×10 <sup>6</sup>           | 2.95×10 <sup>6</sup>          | 3.69×10 <sup>6</sup>           | 2.75×10 <sup>6</sup>           | 1.14×10 <sup>6</sup>           | 4.87×10 <sup>6</sup>           | 4.90×10 <sup>6</sup>          | 2.87×10 <sup>6</sup>           | 1.21×10 <sup>6</sup>           |
| 219              | 2-Hydroxy-3-methyl-2-cyclopenten-1-one    | 7.82×10 <sup>7</sup>          | 6.90×10 <sup>7</sup>           | 8.04×10 <sup>7</sup>           | 9.10×10 <sup>7</sup>           | 1.15×10 <sup>8</sup>           | 9.79×10 <sup>7</sup>           | 9.18×10 <sup>7</sup>          | 6.54×10 <sup>7</sup>           | 4.47×10 <sup>6</sup>          | 6.60×10 <sup>6</sup>           | 2.28×10 <sup>6</sup>           | 1.93×10 <sup>5</sup>           | 5.62×10 <sup>6</sup>           | 6.42×10 <sup>6</sup>          | 1.84×10 <sup>6</sup>           | 2.32×10 <sup>4</sup>           |
| 220              | 2,3,4-Trimethyl-2-cyclopenten-1-one       | 3.23×10 <sup>7</sup>          | 3.83×10 <sup>7</sup>           | 3.92×10 <sup>7</sup>           | 3.73×10 <sup>7</sup>           | 3.43×10 <sup>7</sup>           | 4.78×10 <sup>7</sup>           | 4.33×10 <sup>7</sup>          | 3.12×10 <sup>7</sup>           | 1.93×10 <sup>7</sup>          | 2.76×10 <sup>7</sup>           | 1.39×10 <sup>7</sup>           | 5.87×10 <sup>6</sup>           | 2.47×10 <sup>7</sup>           | 2.67×10 <sup>7</sup>          | 1.67×10 <sup>7</sup>           | 6.13×10 <sup>6</sup>           |
| 221              | 3,5-Dimethyl-1,2-cyclopentanedione        | 2.47×10 <sup>7</sup>          | 2.19×10 <sup>7</sup>           | 2.32×10 <sup>7</sup>           | 2.52×10 <sup>7</sup>           | 2.33×10 <sup>7</sup>           | 2.88×10 <sup>7</sup>           | 2.86×10 <sup>7</sup>          | 2.10×10 <sup>7</sup>           | 4.74×10 <sup>6</sup>          | 4.33×10 <sup>6</sup>           | 2.44×10 <sup>6</sup>           | 4.39×10 <sup>5</sup>           | 3.62×10 <sup>6</sup>           | 4.51×10 <sup>6</sup>          | 2.24×10 <sup>6</sup>           | 6.87×10 <sup>5</sup>           |
| 222              | 3-Ethyl-2-hydroxy-2-cyclopenten-1-one     | 7.90×10 <sup>7</sup>          | 7.09×10 <sup>7</sup>           | 8.21×10 <sup>7</sup>           | 7.76×10 <sup>7</sup>           | 8.97×10 <sup>7</sup>           | 9.64×10 <sup>7</sup>           | 8.65×10 <sup>7</sup>          | 6.32×10 <sup>7</sup>           | 2.35×10 <sup>7</sup>          | 3.70×10 <sup>7</sup>           | 2.07×10 <sup>7</sup>           | 8.61×10 <sup>6</sup>           | 3.15×10 <sup>7</sup>           | 3.76×10 <sup>7</sup>          | 2.61×10 <sup>7</sup>           | 9.02×10 <sup>6</sup>           |
| Aromatics        |                                           |                               |                                |                                |                                |                                |                                |                               |                                |                               |                                |                                |                                |                                |                               |                                |                                |
| 223              | Acetophenone                              | 1.63×10 <sup>7</sup>          | 1.68×10 <sup>7</sup>           | 1.65×10 <sup>7</sup>           | 1.82×10 <sup>7</sup>           | 1.72×10 <sup>7</sup>           | 1.56×10 <sup>7</sup>           | 1.60×10 <sup>7</sup>          | 1.55×10 <sup>7</sup>           | 1.90×10 <sup>7</sup>          | 2.23×10 <sup>7</sup>           | 1.23×10 <sup>7</sup>           | 4.73×10 <sup>6</sup>           | 1.78×10 <sup>7</sup>           | 1.73×10 <sup>7</sup>          | 9.95×10 <sup>6</sup>           | 5.06×10 <sup>6</sup>           |
| 224              | 1-Phenyl-2-propanone                      | 9.22×10 <sup>6</sup>          | 9.11×10 <sup>6</sup>           | 9.00×10 <sup>6</sup>           | 1.07×10 <sup>7</sup>           | 9.27×10 <sup>6</sup>           | 7.89×10 <sup>6</sup>           | 7.46×10 <sup>6</sup>          | 9.60×10 <sup>6</sup>           | 8.88×10 <sup>6</sup>          | 8.73×10 <sup>6</sup>           | 4.08×10 <sup>6</sup>           | 2.25×10 <sup>6</sup>           | 7.63×10 <sup>6</sup>           | 6.87×10 <sup>6</sup>          | 3.70×10 <sup>6</sup>           | 2.35×10 <sup>6</sup>           |
| 225              | <i>o</i> -Hydroxyacetophenone             | 5.66×10 <sup>6</sup>          | 5.21×10 <sup>6</sup>           | 4.89×10 <sup>6</sup>           | 5.35×10 <sup>6</sup>           | 6.22×10 <sup>6</sup>           | 7.48×10 <sup>6</sup>           | 6.53×10 <sup>6</sup>          | 5.72×10 <sup>6</sup>           | 8.16×10 <sup>6</sup>          | 8.03×10 <sup>6</sup>           | 4.60×10 <sup>6</sup>           | 2.00×10 <sup>6</sup>           | 7.64×10 <sup>6</sup>           | 7.70×10 <sup>6</sup>          | 4.86×10 <sup>6</sup>           | 2.13×10 <sup>6</sup>           |
| 226              | 1-Phenyl-1,2-propanedione                 | 1.16×10 <sup>6</sup>          | 1.08×10 <sup>6</sup>           | 9.82×10 <sup>5</sup>           | 1.08×10 <sup>6</sup>           | 1.43×10 <sup>6</sup>           | 1.30×10 <sup>6</sup>           | 1.13×10 <sup>6</sup>          | 1.03×10 <sup>6</sup>           | 1.52×10 <sup>6</sup>          | 1.73×10 <sup>6</sup>           | 9.09×10 <sup>5</sup>           | 2.52×10 <sup>5</sup>           | 1.58×10 <sup>6</sup>           | 1.37×10 <sup>6</sup>          | 7.08×10 <sup>5</sup>           | 3.89×10 <sup>5</sup>           |
| 227              | <i>p</i> -Methylacetophenone              | 2.87×10 <sup>6</sup>          | 3.57×10 <sup>6</sup>           | 2.87×10 <sup>6</sup>           | 3.52×10 <sup>6</sup>           | 3.54×10 <sup>6</sup>           | 4.19×10 <sup>6</sup>           | 5.00×10 <sup>6</sup>          | 2.64×10 <sup>6</sup>           | 6.48×10 <sup>6</sup>          | 7.31×10 <sup>6</sup>           | 3.38×10 <sup>6</sup>           | 1.63×10 <sup>6</sup>           | 6.49×10 <sup>6</sup>           | 6.63×10 <sup>6</sup>          | 3.58×10 <sup>6</sup>           | 1.28×10 <sup>6</sup>           |
| 228              | 1-Phenyl-2-butanone                       | 1.58×10 <sup>6</sup>          | 1.54×10 <sup>6</sup>           | 1.12×10 <sup>6</sup>           | 1.80×10 <sup>6</sup>           | 1.18×10 <sup>6</sup>           | 1.20×10 <sup>6</sup>           | 1.08×10 <sup>6</sup>          | 1.39×10 <sup>6</sup>           | 2.83×10 <sup>6</sup>          | 3.03×10 <sup>6</sup>           | 1.24×10 <sup>6</sup>           | 7.85×10 <sup>5</sup>           | 2.15×10 <sup>6</sup>           | 1.83×10 <sup>6</sup>          | 9.21×10 <sup>5</sup>           | 5.82×10 <sup>5</sup>           |
| 229              | 1-(4-Hydroxyphenyl)-1-propanone           | 7.62×10 <sup>5</sup>          | 5.80×10 <sup>5</sup>           | 6.98×10 <sup>5</sup>           | 4.84×10 <sup>5</sup>           | 6.67×10 <sup>5</sup>           | 7.25×10 <sup>5</sup>           | 5.92×10 <sup>5</sup>          | 6.60×10 <sup>5</sup>           | 8.15×10 <sup>5</sup>          | 7.57×10 <sup>5</sup>           | 7.33×10 <sup>5</sup>           | 1.44×10 <sup>5</sup>           | 8.60×10 <sup>5</sup>           | 7.50×10 <sup>5</sup>          | 4.53×10 <sup>5</sup>           | 1.41×10 <sup>5</sup>           |
| 230              | 4-Hydroxy-3-methylacetophenone            | 5.82×10 <sup>6</sup>          | 5.92×10 <sup>6</sup>           | 5.38×10 <sup>6</sup>           | 7.75×10 <sup>6</sup>           | 7.56×10 <sup>6</sup>           | 8.76×10 <sup>6</sup>           | 7.34×10 <sup>6</sup>          | 5.84×10 <sup>6</sup>           | 5.96×10 <sup>6</sup>          | 6.49×10 <sup>6</sup>           | 3.21×10 <sup>6</sup>           | 1.35×10 <sup>6</sup>           | 6.04×10 <sup>6</sup>           | 5.98×10 <sup>6</sup>          | 3.46×10 <sup>6</sup>           | 1.64×10 <sup>6</sup>           |
| Volatile phenols |                                           | 8.68×10 <sup>8</sup><br>(1.9) | 6.66×10 <sup>8</sup><br>(12.8) | 6.43×10 <sup>8</sup><br>(10.6) | 8.01×10 <sup>8</sup><br>(12.7) | 7.21×10 <sup>8</sup><br>(11.7) | 5.78×10 <sup>8</sup><br>(12.5) | 3.81×10 <sup>8</sup><br>(3.1) | 6.79×10 <sup>8</sup><br>(17.6) | 1.08×10 <sup>9</sup><br>(9.3) | 9.01×10 <sup>8</sup><br>(10.8) | 4.20×10 <sup>8</sup><br>(23.6) | 2.29×10 <sup>8</sup><br>(24.9) | 6.29×10 <sup>8</sup><br>(12.1) | 4.64×10 <sup>8</sup><br>(9.2) | 2.06×10 <sup>8</sup><br>(18.6) | 2.35×10 <sup>8</sup><br>(13.3) |
| 231              | 2-methoxyphenol (Guaiacol)                | 3.28×10 <sup>8</sup>          | 2.15×10 <sup>8</sup>           | 2.47×10 <sup>8</sup>           | 2.94×10 <sup>8</sup>           | 2.68×10 <sup>8</sup>           | 2.26×10 <sup>8</sup>           | 1.60×10 <sup>8</sup>          | 2.27×10 <sup>8</sup>           | 3.30×10 <sup>8</sup>          | 2.69×10 <sup>8</sup>           | 1.21×10 <sup>8</sup>           | 6.04×10 <sup>7</sup>           | 1.92×10 <sup>8</sup>           | 1.40×10 <sup>8</sup>          | 6.75×10 <sup>7</sup>           | 6.50×10 <sup>7</sup>           |
| 232              | 2,6-Dimethylphenol                        | 2.71×10 <sup>6</sup>          | 2.08×10 <sup>6</sup>           | 2.67×10 <sup>6</sup>           | 2.38×10 <sup>6</sup>           | 2.74×10 <sup>6</sup>           | 3.34×10 <sup>6</sup>           | 3.43×10 <sup>6</sup>          | 2.57×10 <sup>6</sup>           | 5.27×10 <sup>6</sup>          | 5.64×10 <sup>6</sup>           | 2.87×10 <sup>6</sup>           | 9.77×10 <sup>5</sup>           | 6.23×10 <sup>6</sup>           | 5.87×10 <sup>6</sup>          | 2.97×10 <sup>6</sup>           | 9.78×10 <sup>5</sup>           |
| 233              | 2-Allylphenol                             | 2.59×10 <sup>7</sup>          | 1.60×10 <sup>7</sup>           | 9.51×10 <sup>6</sup>           | 1.17×10 <sup>7</sup>           | 2.04×10 <sup>7</sup>           | 1.37×10 <sup>7</sup>           | 2.09×10 <sup>7</sup>          | 9.68×10 <sup>6</sup>           | 2.81×10 <sup>7</sup>          | 1.98×10 <sup>7</sup>           | 1.22×10 <sup>7</sup>           | 6.54×10 <sup>6</sup>           | 2.17×10 <sup>7</sup>           | 2.12×10 <sup>7</sup>          | 1.11×10 <sup>7</sup>           | 5.58×10 <sup>6</sup>           |
| 234              | 4-Ethyl-2-methoxyphenol (4-Ethylguaiacol) | 1.38×10 <sup>8</sup>          | 9.95×10 <sup>7</sup>           | 7.55×10 <sup>7</sup>           | 1.22×10 <sup>8</sup>           | 8.86×10 <sup>7</sup>           | 6.00×10 <sup>7</sup>           | 3.18×10 <sup>7</sup>          | 1.02×10 <sup>8</sup>           | 2.04×10 <sup>8</sup>          | 1.60×10 <sup>8</sup>           | 7.13×10 <sup>7</sup>           | 3.98×10 <sup>7</sup>           | 1.03×10 <sup>8</sup>           | 6.79×10 <sup>7</sup>          | 2.50×10 <sup>7</sup>           | 4.30×10 <sup>7</sup>           |

|           |                                            |                               |                                |                               |                               |                                |                               |                                |                                |                                |                                |                                |                                |                               |                                |                                |                               |
|-----------|--------------------------------------------|-------------------------------|--------------------------------|-------------------------------|-------------------------------|--------------------------------|-------------------------------|--------------------------------|--------------------------------|--------------------------------|--------------------------------|--------------------------------|--------------------------------|-------------------------------|--------------------------------|--------------------------------|-------------------------------|
| 235       | 2-Methoxy-4-vinylphenol (4-Vinylguaiaacol) | 3.72×10 <sup>8</sup>          | 3.33×10 <sup>8</sup>           | 3.08×10 <sup>8</sup>          | 3.71×10 <sup>8</sup>          | 3.42×10 <sup>8</sup>           | 2.75×10 <sup>8</sup>          | 1.66×10 <sup>8</sup>           | 3.37×10 <sup>8</sup>           | 5.08×10 <sup>8</sup>           | 4.46×10 <sup>8</sup>           | 2.13×10 <sup>8</sup>           | 1.21×10 <sup>8</sup>           | 3.06×10 <sup>8</sup>          | 2.29×10 <sup>8</sup>           | 9.96×10 <sup>7</sup>           | 1.20×10 <sup>8</sup>          |
| Oxazoles  |                                            | 5.16×10 <sup>7</sup><br>(3.7) | 6.70×10 <sup>7</sup><br>(6.4)  | 6.36×10 <sup>7</sup><br>(6.3) | 6.59×10 <sup>7</sup><br>(3.4) | 3.56×10 <sup>7</sup><br>(45.8) | 7.38×10 <sup>7</sup><br>(2.9) | 4.89×10 <sup>7</sup><br>(15.9) | 4.73×10 <sup>7</sup><br>(28.0) | 5.31×10 <sup>7</sup><br>(11.6) | 6.48×10 <sup>7</sup><br>(7.9)  | 3.10×10 <sup>7</sup><br>(39.7) | 1.81×10 <sup>7</sup><br>(20.3) | 5.31×10 <sup>7</sup><br>(5.0) | 5.27×10 <sup>7</sup><br>(17.9) | 3.14×10 <sup>7</sup><br>(21.5) | 1.63×10 <sup>7</sup><br>(8.8) |
| 236       | 4-Methyloxazole                            | 2.33×10 <sup>6</sup>          | 2.61×10 <sup>6</sup>           | 2.84×10 <sup>6</sup>          | 1.77×10 <sup>6</sup>          | 5.16×10 <sup>5</sup>           | 2.91×10 <sup>6</sup>          | 2.03×10 <sup>6</sup>           | 1.71×10 <sup>6</sup>           | 2.23×10 <sup>6</sup>           | 1.73×10 <sup>6</sup>           | 1.38×10 <sup>6</sup>           | 8.49×10 <sup>5</sup>           | 1.31×10 <sup>6</sup>          | 1.56×10 <sup>6</sup>           | 1.66×10 <sup>6</sup>           | 9.57×10 <sup>5</sup>          |
| 237       | 4,5-Dimethyloxazole                        | 3.49×10 <sup>6</sup>          | 6.08×10 <sup>6</sup>           | 6.86×10 <sup>6</sup>          | 4.97×10 <sup>6</sup>          | 1.56×10 <sup>6</sup>           | 5.87×10 <sup>6</sup>          | 3.74×10 <sup>6</sup>           | 2.73×10 <sup>6</sup>           | 8.44×10 <sup>6</sup>           | 8.56×10 <sup>6</sup>           | 3.43×10 <sup>6</sup>           | 2.31×10 <sup>6</sup>           | 6.46×10 <sup>6</sup>          | 6.25×10 <sup>6</sup>           | 3.57×10 <sup>6</sup>           | 2.09×10 <sup>6</sup>          |
| 238       | Trimethyloxazole                           | 1.83×10 <sup>7</sup>          | 2.88×10 <sup>7</sup>           | 2.78×10 <sup>7</sup>          | 2.63×10 <sup>7</sup>          | 1.05×10 <sup>7</sup>           | 2.88×10 <sup>7</sup>          | 2.11×10 <sup>7</sup>           | 1.63×10 <sup>7</sup>           | 1.38×10 <sup>7</sup>           | 2.32×10 <sup>7</sup>           | 9.71×10 <sup>6</sup>           | 7.00×10 <sup>6</sup>           | 1.97×10 <sup>7</sup>          | 2.09×10 <sup>7</sup>           | 1.25×10 <sup>7</sup>           | 7.35×10 <sup>6</sup>          |
| 239       | 4-Ethyl-2,5-dimethyloxazole                | 5.50×10 <sup>6</sup>          | 6.35×10 <sup>6</sup>           | 5.77×10 <sup>6</sup>          | 6.45×10 <sup>6</sup>          | 1.55×10 <sup>6</sup>           | 7.99×10 <sup>6</sup>          | 3.27×10 <sup>6</sup>           | 5.52×10 <sup>6</sup>           | 3.55×10 <sup>6</sup>           | 6.97×10 <sup>6</sup>           | 3.25×10 <sup>6</sup>           | 2.14×10 <sup>6</sup>           | 6.36×10 <sup>6</sup>          | 3.76×10 <sup>6</sup>           | 3.65×10 <sup>6</sup>           | 5.35×10 <sup>5</sup>          |
| 240       | 2-Ethyl-4-methyl-5-propyloxazole           | 1.44×10 <sup>6</sup>          | 2.48×10 <sup>6</sup>           | 1.93×10 <sup>6</sup>          | 2.32×10 <sup>6</sup>          | 1.15×10 <sup>6</sup>           | 1.96×10 <sup>6</sup>          | 1.69×10 <sup>6</sup>           | 1.82×10 <sup>6</sup>           | 1.75×10 <sup>6</sup>           | 2.56×10 <sup>6</sup>           | 1.70×10 <sup>6</sup>           | 8.73×10 <sup>5</sup>           | 2.44×10 <sup>6</sup>          | 2.31×10 <sup>6</sup>           | 1.26×10 <sup>6</sup>           | 8.21×10 <sup>5</sup>          |
| 241       | 4,5-Dimethyl-2-propyloxazole               | 3.89×10 <sup>5</sup>          | 3.88×10 <sup>5</sup>           | 2.21×10 <sup>5</sup>          | 3.10×10 <sup>5</sup>          | 1.56×10 <sup>5</sup>           | 2.68×10 <sup>5</sup>          | 2.91×10 <sup>5</sup>           | 3.16×10 <sup>5</sup>           | 8.38×10 <sup>5</sup>           | 6.55×10 <sup>5</sup>           | 6.57×10 <sup>5</sup>           | 3.99×10 <sup>5</sup>           | 6.37×10 <sup>5</sup>          | 7.31×10 <sup>5</sup>           | 4.19×10 <sup>5</sup>           | 3.61×10 <sup>5</sup>          |
| 242       | 4,5-Dimethyl-2-isobutyloxazole             | 3.60×10 <sup>6</sup>          | 4.79×10 <sup>6</sup>           | 4.33×10 <sup>6</sup>          | 5.68×10 <sup>6</sup>          | 3.42×10 <sup>6</sup>           | 4.30×10 <sup>6</sup>          | 3.43×10 <sup>6</sup>           | 5.10×10 <sup>6</sup>           | 4.10×10 <sup>6</sup>           | 5.59×10 <sup>6</sup>           | 3.27×10 <sup>6</sup>           | 2.04×10 <sup>6</sup>           | 4.19×10 <sup>6</sup>          | 4.42×10 <sup>6</sup>           | 2.40×10 <sup>6</sup>           | 1.53×10 <sup>6</sup>          |
| 243       | Benzoxazole                                | 1.14×10 <sup>7</sup>          | 1.06×10 <sup>7</sup>           | 1.02×10 <sup>7</sup>          | 1.34×10 <sup>7</sup>          | 1.23×10 <sup>7</sup>           | 1.14×10 <sup>7</sup>          | 9.31×10 <sup>6</sup>           | 9.41×10 <sup>6</sup>           | 6.08×10 <sup>6</sup>           | 4.47×10 <sup>6</sup>           | 1.93×10 <sup>6</sup>           | 1.16×10 <sup>5</sup>           | 2.69×10 <sup>6</sup>          | 2.97×10 <sup>6</sup>           | 4.29×10 <sup>5</sup>           | 1.80×10 <sup>5</sup>          |
| 244       | 2-Methylbenzoxazole                        | 5.07×10 <sup>6</sup>          | 4.93×10 <sup>6</sup>           | 3.62×10 <sup>6</sup>          | 4.56×10 <sup>6</sup>          | 4.40×10 <sup>6</sup>           | 1.02×10 <sup>7</sup>          | 4.01×10 <sup>6</sup>           | 4.34×10 <sup>6</sup>           | 1.23×10 <sup>7</sup>           | 1.11×10 <sup>7</sup>           | 5.65×10 <sup>6</sup>           | 2.41×10 <sup>6</sup>           | 9.34×10 <sup>6</sup>          | 9.82×10 <sup>6</sup>           | 5.46×10 <sup>6</sup>           | 2.43×10 <sup>6</sup>          |
| Pyrazines |                                            | 2.51×10 <sup>9</sup><br>(8.3) | 2.57×10 <sup>9</sup><br>(20.5) | 2.36×10 <sup>9</sup><br>(2.8) | 2.45×10 <sup>9</sup><br>(9.1) | 2.30×10 <sup>9</sup><br>(5.6)  | 2.02×10 <sup>9</sup><br>(8.6) | 2.21×10 <sup>9</sup><br>(15.8) | 2.67×10 <sup>9</sup><br>(15.0) | 1.93×10 <sup>9</sup><br>(5.3)  | 2.10×10 <sup>9</sup><br>(10.8) | 1.47×10 <sup>9</sup><br>(20.0) | 9.26×10 <sup>8</sup><br>(5.6)  | 1.82×10 <sup>9</sup><br>(5.1) | 1.78×10 <sup>9</sup><br>(9.1)  | 1.13×10 <sup>9</sup><br>(6.3)  | 1.03×10 <sup>9</sup><br>(9.1) |
| 245       | Pyrazine                                   | 1.14×10 <sup>8</sup>          | 1.43×10 <sup>8</sup>           | 1.32×10 <sup>8</sup>          | 1.28×10 <sup>8</sup>          | 6.96×10 <sup>7</sup>           | 1.25×10 <sup>8</sup>          | 1.04×10 <sup>8</sup>           | 1.16×10 <sup>8</sup>           | 6.31×10 <sup>7</sup>           | 5.74×10 <sup>7</sup>           | 2.13×10 <sup>7</sup>           | 1.20×10 <sup>7</sup>           | 4.27×10 <sup>7</sup>          | 3.81×10 <sup>7</sup>           | 2.09×10 <sup>7</sup>           | 1.06×10 <sup>7</sup>          |
| 246       | Methylpyrazine                             | 4.04×10 <sup>8</sup>          | 3.15×10 <sup>8</sup>           | 2.57×10 <sup>8</sup>          | 2.47×10 <sup>8</sup>          | 3.92×10 <sup>8</sup>           | 4.24×10 <sup>7</sup>          | 4.46×10 <sup>8</sup>           | 4.28×10 <sup>8</sup>           | 3.85×10 <sup>8</sup>           | 4.07×10 <sup>8</sup>           | 2.85×10 <sup>8</sup>           | 1.96×10 <sup>8</sup>           | 3.73×10 <sup>8</sup>          | 3.56×10 <sup>8</sup>           | 2.38×10 <sup>8</sup>           | 2.08×10 <sup>8</sup>          |
| 247       | 2,5-Dimethylpyrazine                       | 3.18×10 <sup>8</sup>          | 4.58×10 <sup>8</sup>           | 3.80×10 <sup>8</sup>          | 1.28×10 <sup>8</sup>          | 3.33×10 <sup>8</sup>           | 2.44×10 <sup>8</sup>          | 1.55×10 <sup>8</sup>           | 3.88×10 <sup>8</sup>           | 3.46×10 <sup>8</sup>           | 2.84×10 <sup>8</sup>           | 2.88×10 <sup>8</sup>           | 2.15×10 <sup>8</sup>           | 3.86×10 <sup>8</sup>          | 3.46×10 <sup>8</sup>           | 2.62×10 <sup>8</sup>           | 2.05×10 <sup>8</sup>          |
| 248       | 2-Ethylpyrazine                            | 1.22×10 <sup>8</sup>          | 1.04×10 <sup>8</sup>           | 9.79×10 <sup>7</sup>          | 9.75×10 <sup>7</sup>          | 1.03×10 <sup>8</sup>           | 1.04×10 <sup>8</sup>          | 1.05×10 <sup>8</sup>           | 8.42×10 <sup>7</sup>           | 2.17×10 <sup>8</sup>           | 1.54×10 <sup>8</sup>           | 1.49×10 <sup>8</sup>           | 9.55×10 <sup>7</sup>           | 1.41×10 <sup>8</sup>          | 1.60×10 <sup>8</sup>           | 9.27×10 <sup>7</sup>           | 8.51×10 <sup>7</sup>          |
| 249       | 2,3-Dimethylpyrazine                       | 1.43×10 <sup>8</sup>          | 1.34×10 <sup>8</sup>           | 1.42×10 <sup>8</sup>          | 1.70×10 <sup>8</sup>          | 1.06×10 <sup>8</sup>           | 8.26×10 <sup>7</sup>          | 1.26×10 <sup>8</sup>           | 1.44×10 <sup>8</sup>           | 7.19×10 <sup>7</sup>           | 7.99×10 <sup>7</sup>           | 4.48×10 <sup>7</sup>           | 2.49×10 <sup>7</sup>           | 6.92×10 <sup>7</sup>          | 6.31×10 <sup>7</sup>           | 3.45×10 <sup>7</sup>           | 2.88×10 <sup>7</sup>          |
| 250       | Vinylpyrazine                              | 3.81×10 <sup>7</sup>          | 5.11×10 <sup>7</sup>           | 5.11×10 <sup>7</sup>          | 5.69×10 <sup>7</sup>          | 3.07×10 <sup>7</sup>           | 4.84×10 <sup>7</sup>          | 4.00×10 <sup>7</sup>           | 4.52×10 <sup>7</sup>           | 1.81×10 <sup>7</sup>           | 2.16×10 <sup>7</sup>           | 9.22×10 <sup>6</sup>           | 5.06×10 <sup>6</sup>           | 1.65×10 <sup>7</sup>          | 1.56×10 <sup>7</sup>           | 8.49×10 <sup>6</sup>           | 5.31×10 <sup>6</sup>          |
| 251       | 2-Isopropylpyrazine                        | 2.76×10 <sup>6</sup>          | 3.59×10 <sup>6</sup>           | 3.52×10 <sup>6</sup>          | 3.73×10 <sup>6</sup>          | 1.66×10 <sup>6</sup>           | 2.89×10 <sup>6</sup>          | 2.49×10 <sup>6</sup>           | 3.12×10 <sup>6</sup>           | 1.40×10 <sup>6</sup>           | 2.60×10 <sup>6</sup>           | 1.39×10 <sup>6</sup>           | 5.78×10 <sup>5</sup>           | 2.09×10 <sup>6</sup>          | 1.99×10 <sup>6</sup>           | 1.03×10 <sup>6</sup>           | 7.66×10 <sup>5</sup>          |
| 252       | 2-Ethyl-6-methylpyrazine                   | 3.05×10 <sup>8</sup>          | 1.93×10 <sup>8</sup>           | 2.33×10 <sup>8</sup>          | 2.84×10 <sup>8</sup>          | 2.10×10 <sup>8</sup>           | 3.12×10 <sup>8</sup>          | 2.15×10 <sup>8</sup>           | 2.31×10 <sup>8</sup>           | 2.73×10 <sup>8</sup>           | 3.74×10 <sup>8</sup>           | 2.50×10 <sup>8</sup>           | 1.10×10 <sup>8</sup>           | 2.36×10 <sup>8</sup>          | 2.29×10 <sup>8</sup>           | 1.82×10 <sup>8</sup>           | 1.62×10 <sup>8</sup>          |
| 253       | 2-Ethyl-3-methylpyrazine                   | 1.43×10 <sup>8</sup>          | 2.32×10 <sup>8</sup>           | 1.92×10 <sup>8</sup>          | 2.73×10 <sup>8</sup>          | 1.91×10 <sup>8</sup>           | 1.74×10 <sup>8</sup>          | 2.57×10 <sup>8</sup>           | 2.69×10 <sup>8</sup>           | 1.60×10 <sup>8</sup>           | 1.86×10 <sup>8</sup>           | 1.51×10 <sup>8</sup>           | 1.20×10 <sup>8</sup>           | 1.61×10 <sup>8</sup>          | 1.99×10 <sup>8</sup>           | 8.57×10 <sup>7</sup>           | 1.30×10 <sup>8</sup>          |
| 254       | 2-Propylpyrazine                           | 4.40×10 <sup>7</sup>          | 5.50×10 <sup>7</sup>           | 4.34×10 <sup>7</sup>          | 6.34×10 <sup>7</sup>          | 3.25×10 <sup>7</sup>           | 4.47×10 <sup>7</sup>          | 3.64×10 <sup>7</sup>           | 5.07×10 <sup>7</sup>           | 2.28×10 <sup>7</sup>           | 3.54×10 <sup>7</sup>           | 1.82×10 <sup>7</sup>           | 9.12×10 <sup>6</sup>           | 2.68×10 <sup>7</sup>          | 2.64×10 <sup>7</sup>           | 1.18×10 <sup>7</sup>           | 1.06×10 <sup>7</sup>          |
| 255       | 2-Vinyl-6-methylpyrazine                   | 1.30×10 <sup>8</sup>          | 1.45×10 <sup>8</sup>           | 1.37×10 <sup>8</sup>          | 1.61×10 <sup>8</sup>          | 1.13×10 <sup>8</sup>           | 1.27×10 <sup>8</sup>          | 1.13×10 <sup>8</sup>           | 1.27×10 <sup>8</sup>           | 6.48×10 <sup>7</sup>           | 7.64×10 <sup>7</sup>           | 3.82×10 <sup>7</sup>           | 1.86×10 <sup>7</sup>           | 6.13×10 <sup>7</sup>          | 6.15×10 <sup>7</sup>           | 3.31×10 <sup>7</sup>           | 2.14×10 <sup>7</sup>          |
| 256       | Acetylpyrazine                             | 5.10×10 <sup>7</sup>          | 7.33×10 <sup>7</sup>           | 7.91×10 <sup>7</sup>          | 9.96×10 <sup>7</sup>          | 7.50×10 <sup>7</sup>           | 7.36×10 <sup>7</sup>          | 6.20×10 <sup>7</sup>           | 7.67×10 <sup>7</sup>           | 7.78×10 <sup>6</sup>           | 1.36×10 <sup>7</sup>           | 5.60×10 <sup>6</sup>           | 2.33×10 <sup>6</sup>           | 8.41×10 <sup>6</sup>          | 7.95×10 <sup>6</sup>           | 4.70×10 <sup>6</sup>           | 2.79×10 <sup>6</sup>          |
| 257       | 2-Methyl-3-isopropylpyrazine               | 1.84×10 <sup>6</sup>          | 3.72×10 <sup>6</sup>           | 3.76×10 <sup>6</sup>          | 4.14×10 <sup>6</sup>          | 2.85×10 <sup>6</sup>           | 3.70×10 <sup>6</sup>          | 3.92×10 <sup>6</sup>           | 3.92×10 <sup>6</sup>           | 6.55×10 <sup>5</sup>           | 3.10×10 <sup>6</sup>           | 1.63×10 <sup>6</sup>           | 6.33×10 <sup>5</sup>           | 1.97×10 <sup>6</sup>          | 2.18×10 <sup>6</sup>           | 1.62×10 <sup>6</sup>           | 7.97×10 <sup>5</sup>          |
| 258       | Isobutylpyrazine                           | 4.01×10 <sup>6</sup>          | 4.57×10 <sup>6</sup>           | 4.26×10 <sup>6</sup>          | 5.43×10 <sup>6</sup>          | 2.77×10 <sup>6</sup>           | 3.21×10 <sup>6</sup>          | 2.57×10 <sup>6</sup>           | 5.29×10 <sup>6</sup>           | 1.58×10 <sup>6</sup>           | 3.82×10 <sup>6</sup>           | 1.47×10 <sup>6</sup>           | 1.01×10 <sup>6</sup>           | 2.52×10 <sup>6</sup>          | 2.27×10 <sup>6</sup>           | 1.18×10 <sup>6</sup>           | 7.85×10 <sup>5</sup>          |
| 259       | Isopropenylpyrazine                        | 5.66×10 <sup>7</sup>          | 5.91×10 <sup>7</sup>           | 4.34×10 <sup>7</sup>          | 7.49×10 <sup>7</sup>          | 5.11×10 <sup>7</sup>           | 5.10×10 <sup>7</sup>          | 3.84×10 <sup>7</sup>           | 6.01×10 <sup>7</sup>           | 2.07×10 <sup>7</sup>           | 3.42×10 <sup>7</sup>           | 1.68×10 <sup>7</sup>           | 8.20×10 <sup>6</sup>           | 2.19×10 <sup>7</sup>          | 1.65×10 <sup>7</sup>           | 8.42×10 <sup>6</sup>           | 9.29×10 <sup>6</sup>          |
| 260       | 2,6-Diethylpyrazine                        | 1.01×10 <sup>8</sup>          | 3.11×10 <sup>7</sup>           | 2.38×10 <sup>7</sup>          | 3.59×10 <sup>7</sup>          | 7.36×10 <sup>7</sup>           | 3.28×10 <sup>7</sup>          | 5.91×10 <sup>7</sup>           | 5.64×10 <sup>7</sup>           | 3.81×10 <sup>7</sup>           | 6.84×10 <sup>7</sup>           | 3.41×10 <sup>7</sup>           | 2.30×10 <sup>7</sup>           | 4.05×10 <sup>7</sup>          | 4.42×10 <sup>7</sup>           | 3.94×10 <sup>7</sup>           | 3.29×10 <sup>7</sup>          |
| 261       | 2-Isopropyl-3-methoxypyrazine              | 2.78×10 <sup>4</sup>          | 7.73×10 <sup>5</sup>           | 7.27×10 <sup>5</sup>          | 4.00×10 <sup>5</sup>          | 2.30×10 <sup>5</sup>           | 4.89×10 <sup>5</sup>          | 4.55×10 <sup>5</sup>           | 4.44×10 <sup>5</sup>           | 2.29×10 <sup>4</sup>           | 1.06×10 <sup>6</sup>           | 5.28×10 <sup>5</sup>           | 2.32×10 <sup>5</sup>           | 8.63×10 <sup>5</sup>          | 5.27×10 <sup>5</sup>           | 3.88×10 <sup>5</sup>           | 3.31×10 <sup>5</sup>          |

|           |                                                |                                |                                |                                |                                |                                |                                |                                |                                |                                |                               |                                |                                |                                |                                |                                |                               |
|-----------|------------------------------------------------|--------------------------------|--------------------------------|--------------------------------|--------------------------------|--------------------------------|--------------------------------|--------------------------------|--------------------------------|--------------------------------|-------------------------------|--------------------------------|--------------------------------|--------------------------------|--------------------------------|--------------------------------|-------------------------------|
| 262       | 6,7-Dihydro-5H-cyclopentapyrazine              | 8.97×10 <sup>7</sup>           | 9.29×10 <sup>7</sup>           | 7.70×10 <sup>7</sup>           | 1.17×10 <sup>8</sup>           | 8.63×10 <sup>7</sup>           | 9.16×10 <sup>7</sup>           | 6.00×10 <sup>7</sup>           | 1.01×10 <sup>8</sup>           | 1.18×10 <sup>7</sup>           | 1.63×10 <sup>7</sup>          | 9.83×10 <sup>6</sup>           | 2.29×10 <sup>6</sup>           | 1.28×10 <sup>7</sup>           | 2.27×10 <sup>7</sup>           | 5.62×10 <sup>6</sup>           | 4.61×10 <sup>6</sup>          |
| 263       | 2-Acetyl-3-methylpyrazine                      | 1.53×10 <sup>8</sup>           | 1.48×10 <sup>8</sup>           | 1.67×10 <sup>8</sup>           | 1.84×10 <sup>8</sup>           | 1.86×10 <sup>8</sup>           | 1.59×10 <sup>8</sup>           | 1.54×10 <sup>8</sup>           | 1.85×10 <sup>8</sup>           | 3.07×10 <sup>7</sup>           | 3.54×10 <sup>7</sup>          | 1.94×10 <sup>7</sup>           | 9.72×10 <sup>6</sup>           | 2.52×10 <sup>7</sup>           | 2.47×10 <sup>7</sup>           | 1.41×10 <sup>7</sup>           | 1.10×10 <sup>7</sup>          |
| 264       | 2-Isobutyl-3-methylpyrazine                    | 1.71×10 <sup>7</sup>           | 2.01×10 <sup>7</sup>           | 1.82×10 <sup>7</sup>           | 2.52×10 <sup>7</sup>           | 1.34×10 <sup>7</sup>           | 1.42×10 <sup>7</sup>           | 1.06×10 <sup>7</sup>           | 2.60×10 <sup>7</sup>           | 1.25×10 <sup>7</sup>           | 1.85×10 <sup>7</sup>          | 8.92×10 <sup>6</sup>           | 5.21×10 <sup>6</sup>           | 1.12×10 <sup>7</sup>           | 1.04×10 <sup>7</sup>           | 4.59×10 <sup>6</sup>           | 6.36×10 <sup>6</sup>          |
| 265       | 5H-5-Methyl-6,7-dihydrocyclopentapyrazine      | 7.58×10 <sup>7</sup>           | 7.22×10 <sup>7</sup>           | 6.51×10 <sup>7</sup>           | 7.18×10 <sup>7</sup>           | 6.66×10 <sup>7</sup>           | 8.22×10 <sup>7</sup>           | 5.23×10 <sup>7</sup>           | 6.66×10 <sup>7</sup>           | 2.15×10 <sup>7</sup>           | 2.76×10 <sup>7</sup>          | 1.27×10 <sup>7</sup>           | 6.43×10 <sup>6</sup>           | 1.99×10 <sup>7</sup>           | 1.89×10 <sup>7</sup>           | 9.28×10 <sup>6</sup>           | 7.26×10 <sup>6</sup>          |
| 266       | 2-Methyl-6-(1-propenyl)pyrazine (isomer)       | 2.17×10 <sup>6</sup>           | 2.66×10 <sup>6</sup>           | 2.22×10 <sup>6</sup>           | 4.46×10 <sup>6</sup>           | 2.00×10 <sup>6</sup>           | 2.38×10 <sup>6</sup>           | 1.62×10 <sup>6</sup>           | 5.23×10 <sup>6</sup>           | 2.40×10 <sup>6</sup>           | 2.92×10 <sup>6</sup>          | 1.71×10 <sup>6</sup>           | 9.11×10 <sup>5</sup>           | 1.98×10 <sup>6</sup>           | 1.29×10 <sup>6</sup>           | 7.55×10 <sup>5</sup>           | 6.94×10 <sup>5</sup>          |
| 267       | 2,3-Diethyl-5-methylpyrazine                   | 8.40×10 <sup>7</sup>           | 9.16×10 <sup>7</sup>           | 7.54×10 <sup>7</sup>           | 3.97×10 <sup>7</sup>           | 4.65×10 <sup>7</sup>           | 7.75×10 <sup>7</sup>           | 6.85×10 <sup>7</sup>           | 2.22×10 <sup>7</sup>           | 5.95×10 <sup>7</sup>           | 8.40×10 <sup>7</sup>          | 3.69×10 <sup>7</sup>           | 2.53×10 <sup>7</sup>           | 7.61×10 <sup>7</sup>           | 6.37×10 <sup>7</sup>           | 3.26×10 <sup>7</sup>           | 4.33×10 <sup>7</sup>          |
| 268       | 2-Methyl-6-(1-propenyl)pyrazine (isomer)       | 3.37×10 <sup>7</sup>           | 3.16×10 <sup>7</sup>           | 3.12×10 <sup>7</sup>           | 4.34×10 <sup>7</sup>           | 2.98×10 <sup>7</sup>           | 3.10×10 <sup>7</sup>           | 2.19×10 <sup>7</sup>           | 3.69×10 <sup>7</sup>           | 2.11×10 <sup>7</sup>           | 2.21×10 <sup>7</sup>          | 1.15×10 <sup>7</sup>           | 5.71×10 <sup>6</sup>           | 1.44×10 <sup>7</sup>           | 1.52×10 <sup>7</sup>           | 8.22×10 <sup>6</sup>           | 6.92×10 <sup>6</sup>          |
| 269       | 2-Acetyl-3-ethylpyrazine                       | 1.44×10 <sup>7</sup>           | 1.46×10 <sup>7</sup>           | 1.71×10 <sup>7</sup>           | 2.09×10 <sup>7</sup>           | 1.37×10 <sup>7</sup>           | 1.48×10 <sup>7</sup>           | 1.05×10 <sup>7</sup>           | 1.95×10 <sup>7</sup>           | 1.41×10 <sup>7</sup>           | 1.64×10 <sup>7</sup>          | 1.21×10 <sup>7</sup>           | 3.63×10 <sup>6</sup>           | 1.28×10 <sup>7</sup>           | 1.06×10 <sup>7</sup>           | 4.83×10 <sup>6</sup>           | 7.01×10 <sup>6</sup>          |
| 270       | 2-Isoamylpyrazine                              | 4.10×10 <sup>6</sup>           | 4.28×10 <sup>6</sup>           | 4.09×10 <sup>6</sup>           | 5.83×10 <sup>6</sup>           | 3.25×10 <sup>6</sup>           | 3.73×10 <sup>6</sup>           | 2.60×10 <sup>6</sup>           | 5.96×10 <sup>6</sup>           | 4.73×10 <sup>6</sup>           | 5.47×10 <sup>6</sup>          | 2.55×10 <sup>6</sup>           | 2.22×10 <sup>6</sup>           | 3.84×10 <sup>6</sup>           | 9.07×10 <sup>5</sup>           | 1.07×10 <sup>6</sup>           | 1.41×10 <sup>6</sup>          |
| 271       | 2-Isobutyl-3-methoxypyrazine                   | 2.43×10 <sup>6</sup>           | 1.01×10 <sup>7</sup>           | 8.50×10 <sup>6</sup>           | 7.09×10 <sup>6</sup>           | 4.83×10 <sup>6</sup>           | 1.04×10 <sup>7</sup>           | 1.43×10 <sup>7</sup>           | 7.32×10 <sup>6</sup>           | 3.07×10 <sup>6</sup>           | 1.20×10 <sup>7</sup>          | 6.56×10 <sup>6</sup>           | 2.61×10 <sup>6</sup>           | 5.15×10 <sup>6</sup>           | 9.44×10 <sup>6</sup>           | 8.75×10 <sup>6</sup>           | 2.47×10 <sup>6</sup>          |
| 272       | 2-Butyl-3-methylpyrazine                       | 1.25×10 <sup>6</sup>           | 1.30×10 <sup>6</sup>           | 9.24×10 <sup>5</sup>           | 1.53×10 <sup>6</sup>           | 1.02×10 <sup>6</sup>           | 1.06×10 <sup>6</sup>           | 7.68×10 <sup>5</sup>           | 1.38×10 <sup>6</sup>           | 1.34×10 <sup>6</sup>           | 1.30×10 <sup>6</sup>          | 6.84×10 <sup>5</sup>           | 3.22×10 <sup>5</sup>           | 9.53×10 <sup>5</sup>           | 7.12×10 <sup>5</sup>           | 3.53×10 <sup>5</sup>           | 3.65×10 <sup>5</sup>          |
| 273       | 2,5-Dimethyl-3-isobutylpyrazine                | 5.04×10 <sup>6</sup>           | 7.21×10 <sup>6</sup>           | 6.15×10 <sup>6</sup>           | 9.72×10 <sup>6</sup>           | 4.94×10 <sup>6</sup>           | 4.72×10 <sup>6</sup>           | 3.61×10 <sup>6</sup>           | 1.05×10 <sup>7</sup>           | 6.06×10 <sup>6</sup>           | 8.02×10 <sup>6</sup>          | 3.88×10 <sup>6</sup>           | 1.42×10 <sup>6</sup>           | 5.84×10 <sup>6</sup>           | 3.83×10 <sup>6</sup>           | 1.99×10 <sup>6</sup>           | 2.89×10 <sup>6</sup>          |
| 274       | 1-Methylpyrrolo(1,2-a)pyrazine                 | 1.28×10 <sup>7</sup>           | 1.30×10 <sup>7</sup>           | 1.29×10 <sup>7</sup>           | 1.71×10 <sup>7</sup>           | 1.17×10 <sup>7</sup>           | 1.17×10 <sup>7</sup>           | 1.06×10 <sup>7</sup>           | 1.53×10 <sup>7</sup>           | 6.34×10 <sup>6</sup>           | 7.01×10 <sup>6</sup>          | 3.52×10 <sup>6</sup>           | 1.64×10 <sup>6</sup>           | 5.18×10 <sup>6</sup>           | 5.34×10 <sup>6</sup>           | 3.02×10 <sup>6</sup>           | 1.85×10 <sup>6</sup>          |
| 275       | 6,7-Dihydro-2,5-dimethyl-5H-cyclopentapyrazine | 1.28×10 <sup>7</sup>           | 2.13×10 <sup>7</sup>           | 2.02×10 <sup>7</sup>           | 2.72×10 <sup>7</sup>           | 1.89×10 <sup>7</sup>           | 1.83×10 <sup>7</sup>           | 1.38×10 <sup>7</sup>           | 2.54×10 <sup>7</sup>           | 7.67×10 <sup>6</sup>           | 7.11×10 <sup>6</sup>          | 4.45×10 <sup>6</sup>           | 1.57×10 <sup>6</sup>           | 7.40×10 <sup>6</sup>           | 6.43×10 <sup>6</sup>           | 2.88×10 <sup>6</sup>           | 2.33×10 <sup>6</sup>          |
| 276       | 2,5-Diethyl-3,6-dimethylpyrazine               | 5.53×10 <sup>6</sup>           | 7.45×10 <sup>6</sup>           | 6.95×10 <sup>6</sup>           | 9.70×10 <sup>6</sup>           | 5.88×10 <sup>6</sup>           | 5.74×10 <sup>6</sup>           | 4.09×10 <sup>6</sup>           | 9.89×10 <sup>6</sup>           | 6.12×10 <sup>6</sup>           | 8.06×10 <sup>6</sup>          | 4.35×10 <sup>6</sup>           | 2.89×10 <sup>6</sup>           | 5.22×10 <sup>6</sup>           | 4.48×10 <sup>6</sup>           | 2.37×10 <sup>6</sup>           | 3.04×10 <sup>6</sup>          |
| 277       | 2-Methyl-6-isopentylpyrazine                   | 1.44×10 <sup>7</sup>           | 1.53×10 <sup>7</sup>           | 1.39×10 <sup>7</sup>           | 2.25×10 <sup>7</sup>           | 1.13×10 <sup>7</sup>           | 1.10×10 <sup>7</sup>           | 8.44×10 <sup>6</sup>           | 2.35×10 <sup>7</sup>           | 1.83×10 <sup>7</sup>           | 1.83×10 <sup>7</sup>          | 1.07×10 <sup>7</sup>           | 7.31×10 <sup>6</sup>           | 1.14×10 <sup>7</sup>           | 9.66×10 <sup>6</sup>           | 5.20×10 <sup>6</sup>           | 7.20×10 <sup>6</sup>          |
| 278       | 2,6-Dimethyl-3(2-methyl-1-butyl)pyrazine       | 6.92×10 <sup>5</sup>           | 9.77×10 <sup>5</sup>           | 8.26×10 <sup>5</sup>           | 1.41×10 <sup>6</sup>           | 6.22×10 <sup>5</sup>           | 6.37×10 <sup>5</sup>           | 4.52×10 <sup>5</sup>           | 1.42×10 <sup>6</sup>           | 1.00×10 <sup>6</sup>           | 1.42×10 <sup>6</sup>          | 6.44×10 <sup>5</sup>           | 4.34×10 <sup>5</sup>           | 8.22×10 <sup>5</sup>           | 6.68×10 <sup>5</sup>           | 2.78×10 <sup>5</sup>           | 4.63×10 <sup>5</sup>          |
| 279       | 2,5-Dimethyl-3-isoamylpyrazine                 | 5.30×10 <sup>6</sup>           | 8.34×10 <sup>6</sup>           | 6.87×10 <sup>6</sup>           | 1.20×10 <sup>7</sup>           | 5.74×10 <sup>6</sup>           | 5.40×10 <sup>6</sup>           | 4.29×10 <sup>6</sup>           | 1.19×10 <sup>7</sup>           | 7.15×10 <sup>6</sup>           | 6.67×10 <sup>6</sup>          | 3.50×10 <sup>6</sup>           | 3.88×10 <sup>6</sup>           | 4.77×10 <sup>6</sup>           | 3.05×10 <sup>6</sup>           | 1.69×10 <sup>6</sup>           | 3.45×10 <sup>6</sup>          |
| 280       | 2,3-Dimethyl-5-isopentylpyrazine               | 1.03×10 <sup>6</sup>           | 8.48×10 <sup>5</sup>           | 8.74×10 <sup>5</sup>           | 1.82×10 <sup>6</sup>           | 8.99×10 <sup>5</sup>           | 7.45×10 <sup>5</sup>           | 8.76×10 <sup>5</sup>           | 1.46×10 <sup>6</sup>           | 1.89×10 <sup>6</sup>           | 1.42×10 <sup>6</sup>          | 5.76×10 <sup>5</sup>           | 4.32×10 <sup>5</sup>           | 5.31×10 <sup>5</sup>           | 5.39×10 <sup>5</sup>           | 3.62×10 <sup>5</sup>           | 2.79×10 <sup>5</sup>          |
| Pyridines |                                                | 5.75×10 <sup>8</sup><br>(22.9) | 6.26×10 <sup>8</sup><br>(22.0) | 6.17×10 <sup>8</sup><br>(36.1) | 5.99×10 <sup>8</sup><br>(18.3) | 4.77×10 <sup>8</sup><br>(41.2) | 7.51×10 <sup>8</sup><br>(11.0) | 4.19×10 <sup>8</sup><br>(44.4) | 5.11×10 <sup>8</sup><br>(40.1) | 6.57×10 <sup>8</sup><br>(17.1) | 7.77×10 <sup>8</sup><br>(8.7) | 3.31×10 <sup>8</sup><br>(46.8) | 2.34×10 <sup>8</sup><br>(10.2) | 6.12×10 <sup>8</sup><br>(16.2) | 6.26×10 <sup>8</sup><br>(11.0) | 4.23×10 <sup>8</sup><br>(20.0) | 2.75×10 <sup>8</sup><br>(8.5) |
| 281       | Pyridine                                       | 4.33×10 <sup>8</sup>           | 4.72×10 <sup>8</sup>           | 4.70×10 <sup>8</sup>           | 4.32×10 <sup>8</sup>           | 3.48×10 <sup>8</sup>           | 5.82×10 <sup>8</sup>           | 2.78×10 <sup>8</sup>           | 3.84×10 <sup>8</sup>           | 6.25×10 <sup>8</sup>           | 7.43×10 <sup>8</sup>          | 3.17×10 <sup>8</sup>           | 2.25×10 <sup>8</sup>           | 5.79×10 <sup>8</sup>           | 6.02×10 <sup>8</sup>           | 4.10×10 <sup>8</sup>           | 2.68×10 <sup>8</sup>          |
| 282       | 2-Methylpyridine                               | 2.85×10 <sup>7</sup>           | 3.08×10 <sup>7</sup>           | 3.02×10 <sup>7</sup>           | 2.93×10 <sup>7</sup>           | 1.69×10 <sup>7</sup>           | 3.27×10 <sup>7</sup>           | 2.37×10 <sup>7</sup>           | 1.94×10 <sup>7</sup>           | 5.27×10 <sup>6</sup>           | 2.14×10 <sup>6</sup>          | 9.72×10 <sup>5</sup>           | 7.89×10 <sup>5</sup>           | 2.05×10 <sup>6</sup>           | 1.80×10 <sup>6</sup>           | 7.29×10 <sup>5</sup>           | 5.24×10 <sup>5</sup>          |
| 283       | 2,6-Dimethylpyridine                           | 3.83×10 <sup>6</sup>           | 4.63×10 <sup>6</sup>           | 4.93×10 <sup>6</sup>           | 5.25×10 <sup>6</sup>           | 2.96×10 <sup>6</sup>           | 6.54×10 <sup>6</sup>           | 5.11×10 <sup>6</sup>           | 4.22×10 <sup>6</sup>           | n.d.                           | n.d.                          | n.d.                           | n.d.                           | n.d.                           | n.d.                           | n.d.                           | n.d.                          |
| 284       | 2-Ethylpyridine                                | 6.72×10 <sup>6</sup>           | 6.46×10 <sup>6</sup>           | 6.57×10 <sup>6</sup>           | 6.63×10 <sup>6</sup>           | 3.77×10 <sup>6</sup>           | 7.18×10 <sup>6</sup>           | 5.65×10 <sup>6</sup>           | 4.66×10 <sup>6</sup>           | 2.22×10 <sup>6</sup>           | 3.10×10 <sup>6</sup>          | 8.90×10 <sup>5</sup>           | 7.38×10 <sup>5</sup>           | 2.37×10 <sup>6</sup>           | 2.37×10 <sup>6</sup>           | 1.22×10 <sup>6</sup>           | 7.25×10 <sup>5</sup>          |
| 285       | 3-Ethylpyridine                                | 5.15×10 <sup>7</sup>           | 5.54×10 <sup>7</sup>           | 4.42×10 <sup>7</sup>           | 5.77×10 <sup>7</sup>           | 4.32×10 <sup>7</sup>           | 5.67×10 <sup>7</sup>           | 5.05×10 <sup>7</sup>           | 4.51×10 <sup>7</sup>           | 7.30×10 <sup>6</sup>           | 7.96×10 <sup>6</sup>          | 1.99×10 <sup>6</sup>           | 2.69×10 <sup>6</sup>           | 1.24×10 <sup>7</sup>           | 5.60×10 <sup>6</sup>           | 1.47×10 <sup>6</sup>           | 1.54×10 <sup>6</sup>          |
| 286       | 3-Vinylpyridine                                | 9.51×10 <sup>5</sup>           | 2.54×10 <sup>6</sup>           | 3.09×10 <sup>6</sup>           | 2.39×10 <sup>6</sup>           | 2.45×10 <sup>6</sup>           | 1.67×10 <sup>6</sup>           | 1.13×10 <sup>6</sup>           | 1.85×10 <sup>6</sup>           | 2.94×10 <sup>6</sup>           | 2.17×10 <sup>6</sup>          | 7.18×10 <sup>5</sup>           | 3.90×10 <sup>5</sup>           | 1.22×10 <sup>6</sup>           | 7.75×10 <sup>5</sup>           | 4.22×10 <sup>4</sup>           | 2.75×10 <sup>5</sup>          |
| 287       | 2-Acetylpyridine                               | 4.20×10 <sup>7</sup>           | 3.98×10 <sup>7</sup>           | 4.34×10 <sup>7</sup>           | 4.88×10 <sup>7</sup>           | 4.23×10 <sup>7</sup>           | 4.93×10 <sup>7</sup>           | 4.33×10 <sup>7</sup>           | 3.85×10 <sup>7</sup>           | 1.07×10 <sup>7</sup>           | 1.46×10 <sup>7</sup>          | 7.99×10 <sup>6</sup>           | 3.43×10 <sup>6</sup>           | 1.20×10 <sup>7</sup>           | 1.06×10 <sup>7</sup>           | 7.69×10 <sup>6</sup>           | 3.59×10 <sup>6</sup>          |
| 288       | Methyl 3-pyridinecarboxylate                   | 8.19×10 <sup>6</sup>           | 1.32×10 <sup>7</sup>           | 1.29×10 <sup>7</sup>           | 1.51×10 <sup>7</sup>           | 1.58×10 <sup>7</sup>           | 1.36×10 <sup>7</sup>           | 1.04×10 <sup>7</sup>           | 1.23×10 <sup>7</sup>           | 2.13×10 <sup>6</sup>           | 3.59×10 <sup>6</sup>          | 1.28×10 <sup>6</sup>           | 2.98×10 <sup>5</sup>           | 2.11×10 <sup>6</sup>           | 2.30×10 <sup>6</sup>           | 1.46×10 <sup>6</sup>           | 5.38×10 <sup>5</sup>          |
| 289       | 2-Pentylpyridine                               | 1.20×10 <sup>6</sup>           | 1.17×10 <sup>6</sup>           | 1.00×10 <sup>6</sup>           | 1.71×10 <sup>6</sup>           | 2.18×10 <sup>6</sup>           | 1.67×10 <sup>6</sup>           | 6.00×10 <sup>5</sup>           | 1.51×10 <sup>6</sup>           | 9.64×10 <sup>5</sup>           | 7.27×10 <sup>5</sup>          | 2.91×10 <sup>5</sup>           | 2.90×10 <sup>5</sup>           | 1.17×10 <sup>6</sup>           | 7.24×10 <sup>5</sup>           | 1.40×10 <sup>5</sup>           | 3.30×10 <sup>5</sup>          |

| Pyrroles           |                                    | 8.61×10 <sup>8</sup><br>(2.9)  | 8.63×10 <sup>8</sup><br>(5.4)  | 9.04×10 <sup>8</sup><br>(8.6)  | 9.02×10 <sup>8</sup><br>(8.8) | 8.23×10 <sup>8</sup><br>(7.6)  | 9.96×10 <sup>8</sup><br>(4.2)  | 8.19×10 <sup>8</sup><br>(6.4)  | 7.23×10 <sup>8</sup><br>(29.5) | 9.19×10 <sup>8</sup><br>(3.6)  | 9.81×10 <sup>8</sup><br>(8.4)  | 4.78×10 <sup>8</sup><br>(22.6) | 3.28×10 <sup>8</sup><br>(17.9) | 7.00×10 <sup>8</sup><br>(7.4)  | 7.19×10 <sup>8</sup><br>(12.5) | 4.99×10 <sup>8</sup><br>(19.4) | 2.93×10 <sup>8</sup><br>(5.6)  |
|--------------------|------------------------------------|--------------------------------|--------------------------------|--------------------------------|-------------------------------|--------------------------------|--------------------------------|--------------------------------|--------------------------------|--------------------------------|--------------------------------|--------------------------------|--------------------------------|--------------------------------|--------------------------------|--------------------------------|--------------------------------|
| 290                | 1-Methylpyrrole                    | 4.38×10 <sup>7</sup>           | 6.33×10 <sup>7</sup>           | 6.77×10 <sup>7</sup>           | 4.10×10 <sup>7</sup>          | 1.24×10 <sup>7</sup>           | 5.81×10 <sup>7</sup>           | 3.78×10 <sup>7</sup>           | 2.91×10 <sup>7</sup>           | 1.21×10 <sup>8</sup>           | 2.12×10 <sup>8</sup>           | 1.04×10 <sup>8</sup>           | 8.48×10 <sup>7</sup>           | 1.33×10 <sup>8</sup>           | 1.31×10 <sup>8</sup>           | 1.07×10 <sup>8</sup>           | 5.87×10 <sup>7</sup>           |
| 291                | Pyrrole                            | 3.70×10 <sup>7</sup>           | 7.56×10 <sup>7</sup>           | 6.13×10 <sup>7</sup>           | 7.65×10 <sup>7</sup>          | 8.29×10 <sup>6</sup>           | 4.98×10 <sup>7</sup>           | 2.47×10 <sup>7</sup>           | 5.32×10 <sup>7</sup>           | 1.67×10 <sup>8</sup>           | 1.45×10 <sup>8</sup>           | 4.68×10 <sup>7</sup>           | 5.37×10 <sup>7</sup>           | 7.08×10 <sup>7</sup>           | 7.80×10 <sup>7</sup>           | 4.15×10 <sup>7</sup>           | 4.73×10 <sup>7</sup>           |
| 292                | 1-Ethylpyrrole                     | 1.14×10 <sup>7</sup>           | 2.23×10 <sup>7</sup>           | 2.11×10 <sup>7</sup>           | 1.32×10 <sup>7</sup>          | 3.72×10 <sup>6</sup>           | 1.90×10 <sup>7</sup>           | 9.72×10 <sup>6</sup>           | 7.73×10 <sup>6</sup>           | 6.17×10 <sup>7</sup>           | 7.36×10 <sup>7</sup>           | 3.65×10 <sup>7</sup>           | 2.44×10 <sup>7</sup>           | 6.17×10 <sup>7</sup>           | 5.45×10 <sup>7</sup>           | 2.55×10 <sup>7</sup>           | 1.46×10 <sup>7</sup>           |
| 293                | 2,5-Dimethylpyrrole                | 7.71×10 <sup>6</sup>           | 1.93×10 <sup>7</sup>           | 1.59×10 <sup>7</sup>           | 1.20×10 <sup>7</sup>          | 1.44×10 <sup>6</sup>           | 1.36×10 <sup>7</sup>           | 5.53×10 <sup>6</sup>           | 6.16×10 <sup>6</sup>           | 3.30×10 <sup>7</sup>           | 4.73×10 <sup>7</sup>           | 1.33×10 <sup>7</sup>           | 1.31×10 <sup>7</sup>           | 2.44×10 <sup>7</sup>           | 2.27×10 <sup>7</sup>           | 1.57×10 <sup>7</sup>           | 7.86×10 <sup>6</sup>           |
| 294                | 2-Ethyl-4-methylpyrrole            | 4.42×10 <sup>6</sup>           | 5.56×10 <sup>6</sup>           | 3.99×10 <sup>6</sup>           | 3.63×10 <sup>6</sup>          | 9.66×10 <sup>5</sup>           | 3.15×10 <sup>6</sup>           | 3.74×10 <sup>6</sup>           | 2.81×10 <sup>6</sup>           | 6.49×10 <sup>6</sup>           | 1.28×10 <sup>7</sup>           | 5.20×10 <sup>6</sup>           | 4.38×10 <sup>6</sup>           | 8.99×10 <sup>6</sup>           | 4.51×10 <sup>6</sup>           | 4.39×10 <sup>6</sup>           | 2.78×10 <sup>6</sup>           |
| 295                | 1-Acetylpyrrole                    | 3.35×10 <sup>6</sup>           | 3.52×10 <sup>6</sup>           | 2.93×10 <sup>6</sup>           | 3.26×10 <sup>6</sup>          | 2.49×10 <sup>6</sup>           | 2.64×10 <sup>6</sup>           | 2.87×10 <sup>6</sup>           | 3.05×10 <sup>6</sup>           | 3.12×10 <sup>6</sup>           | 3.43×10 <sup>6</sup>           | 1.75×10 <sup>6</sup>           | 8.66×10 <sup>5</sup>           | 2.80×10 <sup>6</sup>           | 2.61×10 <sup>6</sup>           | 1.49×10 <sup>6</sup>           | 1.01×10 <sup>6</sup>           |
| 296                | 3-Ethyl-2,4-dimethylpyrrole        | 1.35×10 <sup>7</sup>           | 1.60×10 <sup>7</sup>           | 1.49×10 <sup>7</sup>           | 1.43×10 <sup>7</sup>          | 5.52×10 <sup>6</sup>           | 1.31×10 <sup>7</sup>           | 9.47×10 <sup>6</sup>           | 1.28×10 <sup>7</sup>           | 1.35×10 <sup>7</sup>           | 2.32×10 <sup>7</sup>           | 1.17×10 <sup>7</sup>           | 8.62×10 <sup>6</sup>           | 1.62×10 <sup>7</sup>           | 1.53×10 <sup>7</sup>           | 8.31×10 <sup>6</sup>           | 6.23×10 <sup>6</sup>           |
| 297                | 1-Methyl-2-formylpyrrole           | 2.89×10 <sup>8</sup>           | 2.36×10 <sup>8</sup>           | 2.83×10 <sup>8</sup>           | 3.00×10 <sup>8</sup>          | 2.75×10 <sup>8</sup>           | 3.21×10 <sup>8</sup>           | 3.01×10 <sup>8</sup>           | 2.33×10 <sup>8</sup>           | 2.64×10 <sup>8</sup>           | 1.98×10 <sup>8</sup>           | 1.46×10 <sup>8</sup>           | 8.66×10 <sup>7</sup>           | 1.89×10 <sup>8</sup>           | 1.89×10 <sup>8</sup>           | 1.56×10 <sup>8</sup>           | 9.13×10 <sup>7</sup>           |
| 298                | 1-Ethyl-2-formylpyrrole            | 8.15×10 <sup>7</sup>           | 7.12×10 <sup>7</sup>           | 5.97×10 <sup>7</sup>           | 7.21×10 <sup>7</sup>          | 4.66×10 <sup>7</sup>           | 7.79×10 <sup>7</sup>           | 5.96×10 <sup>7</sup>           | 5.37×10 <sup>7</sup>           | 8.16×10 <sup>7</sup>           | 7.45×10 <sup>7</sup>           | 2.61×10 <sup>7</sup>           | 1.42×10 <sup>7</sup>           | 4.70×10 <sup>7</sup>           | 6.00×10 <sup>7</sup>           | 3.46×10 <sup>7</sup>           | 1.78×10 <sup>7</sup>           |
| 299                | 2-Acetyl-1-methylpyrrole           | 1.60×10 <sup>8</sup>           | 1.53×10 <sup>8</sup>           | 1.57×10 <sup>8</sup>           | 1.31×10 <sup>8</sup>          | 1.60×10 <sup>8</sup>           | 1.93×10 <sup>8</sup>           | 1.77×10 <sup>8</sup>           | 1.21×10 <sup>8</sup>           | 1.32×10 <sup>8</sup>           | 1.56×10 <sup>8</sup>           | 7.51×10 <sup>7</sup>           | 3.18×10 <sup>7</sup>           | 1.23×10 <sup>8</sup>           | 1.37×10 <sup>8</sup>           | 8.62×10 <sup>7</sup>           | 3.53×10 <sup>7</sup>           |
| 300                | 2-Acetylpyrrole                    | 2.09×10 <sup>8</sup>           | 1.97×10 <sup>8</sup>           | 2.17×10 <sup>8</sup>           | 2.36×10 <sup>8</sup>          | 3.07×10 <sup>8</sup>           | 2.45×10 <sup>8</sup>           | 1.88×10 <sup>8</sup>           | 2.01×10 <sup>8</sup>           | 3.61×10 <sup>7</sup>           | 3.55×10 <sup>7</sup>           | 1.17×10 <sup>7</sup>           | 5.29×10 <sup>6</sup>           | 2.29×10 <sup>7</sup>           | 2.40×10 <sup>7</sup>           | 1.83×10 <sup>7</sup>           | 1.01×10 <sup>7</sup>           |
| Sulfur compounds   |                                    | 1.46×10 <sup>8</sup><br>(17.7) | 1.65×10 <sup>8</sup><br>(34.9) | 1.62×10 <sup>8</sup><br>(32.2) | 1.25×10 <sup>8</sup><br>(3.1) | 5.11×10 <sup>7</sup><br>(17.6) | 1.90×10 <sup>8</sup><br>(50.1) | 1.08×10 <sup>8</sup><br>(34.0) | 9.87×10 <sup>7</sup><br>(16.4) | 3.76×10 <sup>8</sup><br>(6.7)  | 4.42×10 <sup>8</sup><br>(9.2)  | 2.07×10 <sup>8</sup><br>(9.9)  | 1.99×10 <sup>8</sup><br>(38.7) | 3.33×10 <sup>8</sup><br>(34.2) | 3.32×10 <sup>8</sup><br>(30.9) | 2.13×10 <sup>8</sup><br>(19.1) | 1.35×10 <sup>8</sup><br>(7.0)  |
| 301                | Dimethyl disulfide                 | 8.61×10 <sup>6</sup>           | 1.60×10 <sup>7</sup>           | 1.91×10 <sup>7</sup>           | 6.47×10 <sup>6</sup>          | 1.54×10 <sup>6</sup>           | 1.63×10 <sup>7</sup>           | 6.92×10 <sup>6</sup>           | 4.77×10 <sup>6</sup>           | 6.03×10 <sup>7</sup>           | 6.61×10 <sup>7</sup>           | 3.01×10 <sup>7</sup>           | 3.17×10 <sup>7</sup>           | 4.92×10 <sup>7</sup>           | 4.77×10 <sup>7</sup>           | 2.30×10 <sup>7</sup>           | 1.83×10 <sup>7</sup>           |
| 302                | Methylthio-2-propanone             | 4.78×10 <sup>5</sup>           | 1.06×10 <sup>6</sup>           | 1.27×10 <sup>6</sup>           | 1.04×10 <sup>6</sup>          | 3.29×10 <sup>4</sup>           | 1.22×10 <sup>6</sup>           | 4.76×10 <sup>5</sup>           | 3.51×10 <sup>5</sup>           | 1.42×10 <sup>6</sup>           | 9.60×10 <sup>5</sup>           | 4.27×10 <sup>5</sup>           | 3.58×10 <sup>5</sup>           | 7.28×10 <sup>5</sup>           | 7.33×10 <sup>5</sup>           | 3.71×10 <sup>5</sup>           | 2.08×10 <sup>5</sup>           |
| 303                | 2-Furylmethylsulfide               | 1.87×10 <sup>5</sup>           | 3.36×10 <sup>5</sup>           | 5.64×10 <sup>5</sup>           | 2.94×10 <sup>5</sup>          | 1.59×10 <sup>4</sup>           | 3.21×10 <sup>5</sup>           | 2.54×10 <sup>5</sup>           | 1.56×10 <sup>5</sup>           | 1.24×10 <sup>6</sup>           | 1.81×10 <sup>6</sup>           | 7.28×10 <sup>5</sup>           | 4.75×10 <sup>5</sup>           | 1.13×10 <sup>6</sup>           | 1.11×10 <sup>6</sup>           | 5.04×10 <sup>5</sup>           | 3.14×10 <sup>5</sup>           |
| 304                | 2-Furfurylthiol                    | 2.16×10 <sup>5</sup>           | 1.38×10 <sup>6</sup>           | 1.57×10 <sup>6</sup>           | 9.52×10 <sup>5</sup>          | 1.33×10 <sup>5</sup>           | 6.76×10 <sup>5</sup>           | 1.72×10 <sup>5</sup>           | 1.59×10 <sup>5</sup>           | 5.69×10 <sup>6</sup>           | 1.08×10 <sup>7</sup>           | 1.93×10 <sup>6</sup>           | 2.77×10 <sup>6</sup>           | 3.86×10 <sup>6</sup>           | 5.67×10 <sup>6</sup>           | 3.01×10 <sup>6</sup>           | 1.08×10 <sup>6</sup>           |
| 305                | 3-(Methylthio)propanal (Methional) | 1.66×10 <sup>5</sup>           | 6.88×10 <sup>5</sup>           | 7.37×10 <sup>5</sup>           | 7.46×10 <sup>5</sup>          | 7.13×10 <sup>3</sup>           | 8.24×10 <sup>5</sup>           | 1.74×10 <sup>5</sup>           | 1.04×10 <sup>5</sup>           | 8.45×10 <sup>5</sup>           | 8.50×10 <sup>5</sup>           | 1.73×10 <sup>5</sup>           | 2.33×10 <sup>5</sup>           | 6.25×10 <sup>5</sup>           | 7.24×10 <sup>5</sup>           | 4.40×10 <sup>5</sup>           | 1.55×10 <sup>5</sup>           |
| 306                | 1-(Methylthio)-2-butanone          | 2.16×10 <sup>5</sup>           | 6.68×10 <sup>5</sup>           | 7.58×10 <sup>5</sup>           | 6.99×10 <sup>5</sup>          | 7.57×10 <sup>4</sup>           | 6.50×10 <sup>5</sup>           | 2.69×10 <sup>5</sup>           | 1.08×10 <sup>6</sup>           | 8.47×10 <sup>5</sup>           | 8.51×10 <sup>5</sup>           | 2.78×10 <sup>5</sup>           | 2.33×10 <sup>5</sup>           | 6.11×10 <sup>5</sup>           | 5.98×10 <sup>5</sup>           | 2.50×10 <sup>5</sup>           | 2.11×10 <sup>5</sup>           |
| 307                | Dimethyl trisulfide                | 1.00×10 <sup>6</sup>           | 4.22×10 <sup>6</sup>           | 3.71×10 <sup>6</sup>           | 6.97×10 <sup>5</sup>          | 4.27×10 <sup>6</sup>           | 3.60×10 <sup>6</sup>           | 8.68×10 <sup>6</sup>           | 7.34×10 <sup>5</sup>           | 1.52×10 <sup>7</sup>           | 3.69×10 <sup>7</sup>           | 1.79×10 <sup>7</sup>           | 8.47×10 <sup>6</sup>           | 2.40×10 <sup>7</sup>           | 2.01×10 <sup>7</sup>           | 8.32×10 <sup>6</sup>           | 5.66×10 <sup>6</sup>           |
| 308                | 3-Mercapto-3-methyl-1-butanol      | 2.16×10 <sup>6</sup>           | 7.34×10 <sup>6</sup>           | 8.87×10 <sup>6</sup>           | 7.04×10 <sup>6</sup>          | 1.52×10 <sup>6</sup>           | 1.39×10 <sup>7</sup>           | 4.84×10 <sup>6</sup>           | 2.13×10 <sup>6</sup>           | 4.49×10 <sup>6</sup>           | 4.90×10 <sup>6</sup>           | 9.67×10 <sup>5</sup>           | 7.87×10 <sup>5</sup>           | 3.46×10 <sup>6</sup>           | 5.06×10 <sup>6</sup>           | 2.61×10 <sup>6</sup>           | 4.40×10 <sup>5</sup>           |
| 309                | 2-Furfuryl methyl sulfide          | 9.20×10 <sup>7</sup>           | 1.06×10 <sup>8</sup>           | 9.55×10 <sup>7</sup>           | 7.41×10 <sup>7</sup>          | 2.07×10 <sup>7</sup>           | 1.17×10 <sup>8</sup>           | 6.11×10 <sup>7</sup>           | 6.12×10 <sup>7</sup>           | 2.00×10 <sup>8</sup>           | 2.48×10 <sup>8</sup>           | 1.23×10 <sup>8</sup>           | 1.29×10 <sup>8</sup>           | 2.00×10 <sup>8</sup>           | 1.96×10 <sup>8</sup>           | 1.45×10 <sup>8</sup>           | 9.23×10 <sup>7</sup>           |
| 310                | 3-Mercapto-3-methylbutyl formate   | 2.13×10 <sup>6</sup>           | 3.29×10 <sup>6</sup>           | 3.86×10 <sup>6</sup>           | 3.12×10 <sup>6</sup>          | 1.95×10 <sup>6</sup>           | 5.70×10 <sup>6</sup>           | 3.47×10 <sup>6</sup>           | 1.44×10 <sup>6</sup>           | 5.34×10 <sup>6</sup>           | 7.01×10 <sup>6</sup>           | 2.84×10 <sup>6</sup>           | 1.88×10 <sup>6</sup>           | 6.11×10 <sup>6</sup>           | 9.42×10 <sup>6</sup>           | 5.38×10 <sup>6</sup>           | 1.47×10 <sup>6</sup>           |
| 311                | 3-Mercapto-3-methylbutyl acetate   | 3.86×10 <sup>6</sup>           | 1.53×10 <sup>6</sup>           | 4.81×10 <sup>6</sup>           | 4.49×10 <sup>6</sup>          | 2.74×10 <sup>6</sup>           | 7.96×10 <sup>6</sup>           | 3.23×10 <sup>6</sup>           | 4.57×10 <sup>6</sup>           | 1.10×10 <sup>7</sup>           | 9.89×10 <sup>6</sup>           | 2.23×10 <sup>6</sup>           | 1.93×10 <sup>6</sup>           | 9.22×10 <sup>6</sup>           | 9.03×10 <sup>6</sup>           | 6.54×10 <sup>6</sup>           | 1.15×10 <sup>6</sup>           |
| 312                | Furfuryl methyl disulfide          | 3.54×10 <sup>7</sup>           | 2.31×10 <sup>7</sup>           | 2.13×10 <sup>7</sup>           | 2.51×10 <sup>7</sup>          | 1.81×10 <sup>7</sup>           | 2.23×10 <sup>7</sup>           | 1.83×10 <sup>7</sup>           | 2.19×10 <sup>7</sup>           | 6.88×10 <sup>7</sup>           | 5.46×10 <sup>7</sup>           | 2.60×10 <sup>7</sup>           | 2.06×10 <sup>7</sup>           | 3.39×10 <sup>7</sup>           | 3.55×10 <sup>7</sup>           | 1.79×10 <sup>7</sup>           | 1.38×10 <sup>7</sup>           |
| Terpenic compounds |                                    | 8.77×10 <sup>7</sup><br>(4.0)  | 1.88×10 <sup>8</sup><br>(1.5)  | 2.49×10 <sup>8</sup><br>(3.5)  | 2.02×10 <sup>8</sup><br>(5.9) | 1.87×10 <sup>8</sup><br>(19.7) | 3.42×10 <sup>8</sup><br>(2.0)  | 3.18×10 <sup>8</sup><br>(3.2)  | 1.64×10 <sup>8</sup><br>(23.9) | 2.83×10 <sup>7</sup><br>(17.1) | 7.68×10 <sup>7</sup><br>(20.9) | 7.41×10 <sup>7</sup><br>(22.7) | 3.26×10 <sup>7</sup><br>(22.0) | 9.97×10 <sup>7</sup><br>(13.7) | 1.19×10 <sup>8</sup><br>(17.0) | 8.86×10 <sup>7</sup><br>(23.3) | 2.63×10 <sup>7</sup><br>(27.7) |
| Monoterpenes       |                                    |                                |                                |                                |                               |                                |                                |                                |                                |                                |                                |                                |                                |                                |                                |                                |                                |
| 313                | α-Pinene                           | 3.65×10 <sup>6</sup>           | 5.82×10 <sup>6</sup>           | 4.40×10 <sup>6</sup>           | 4.23×10 <sup>6</sup>          | 4.05×10 <sup>6</sup>           | 7.60×10 <sup>6</sup>           | 6.29×10 <sup>6</sup>           | 2.78×10 <sup>6</sup>           | 3.83×10 <sup>5</sup>           | 7.88×10 <sup>5</sup>           | 6.39×10 <sup>5</sup>           | 3.19×10 <sup>5</sup>           | 7.66×10 <sup>5</sup>           | 8.92×10 <sup>5</sup>           | 4.36×10 <sup>5</sup>           | 1.77×10 <sup>5</sup>           |

|                       |                                     |                      |                      |                      |                      |                      |                      |                      |                      |                      |                      |                      |                      |                      |                      |                      |                      |
|-----------------------|-------------------------------------|----------------------|----------------------|----------------------|----------------------|----------------------|----------------------|----------------------|----------------------|----------------------|----------------------|----------------------|----------------------|----------------------|----------------------|----------------------|----------------------|
| 314                   | $\beta$ -Pinene                     | 1.87×10 <sup>6</sup> | 2.23×10 <sup>6</sup> | 9.72×10 <sup>5</sup> | 1.14×10 <sup>6</sup> | 1.51×10 <sup>6</sup> | 2.09×10 <sup>6</sup> | 1.44×10 <sup>6</sup> | 9.36×10 <sup>5</sup> | 2.51×10 <sup>5</sup> | 4.92×10 <sup>5</sup> | 3.31×10 <sup>5</sup> | 3.01×10 <sup>5</sup> | 7.31×10 <sup>5</sup> | 9.21×10 <sup>5</sup> | 5.59×10 <sup>5</sup> | 1.76×10 <sup>5</sup> |
| 315                   | 2,6-Dimethyl-2,6-octadiene (isomer) | 9.35×10 <sup>5</sup> | 5.46×10 <sup>6</sup> | 7.16×10 <sup>6</sup> | 3.99×10 <sup>6</sup> | 2.81×10 <sup>6</sup> | 9.56×10 <sup>6</sup> | 9.14×10 <sup>6</sup> | 3.49×10 <sup>6</sup> | 5.32×10 <sup>4</sup> | 5.80×10 <sup>5</sup> | 4.99×10 <sup>5</sup> | 1.90×10 <sup>5</sup> | 6.69×10 <sup>5</sup> | 8.92×10 <sup>5</sup> | 5.36×10 <sup>5</sup> | 1.06×10 <sup>5</sup> |
| 316                   | $\beta$ -Myrcene                    | 4.02×10 <sup>6</sup> | 2.13×10 <sup>7</sup> | 2.83×10 <sup>7</sup> | 1.91×10 <sup>7</sup> | 1.38×10 <sup>7</sup> | 4.19×10 <sup>7</sup> | 3.75×10 <sup>7</sup> | 1.48×10 <sup>7</sup> | 2.35×10 <sup>5</sup> | 2.95×10 <sup>6</sup> | 2.15×10 <sup>6</sup> | 1.24×10 <sup>6</sup> | 3.95×10 <sup>6</sup> | 4.92×10 <sup>6</sup> | 3.17×10 <sup>6</sup> | 8.27×10 <sup>5</sup> |
| 317                   | 2,6-Dimethyl-2,6-octadiene (isomer) | 1.66×10 <sup>6</sup> | 1.13×10 <sup>7</sup> | 1.53×10 <sup>7</sup> | 9.34×10 <sup>6</sup> | 6.85×10 <sup>6</sup> | 2.09×10 <sup>7</sup> | 1.91×10 <sup>7</sup> | 7.61×10 <sup>6</sup> | 3.16×10 <sup>4</sup> | 5.37×10 <sup>5</sup> | 1.00×10 <sup>6</sup> | 4.32×10 <sup>5</sup> | 1.39×10 <sup>6</sup> | 2.14×10 <sup>6</sup> | 1.28×10 <sup>6</sup> | 3.02×10 <sup>5</sup> |
| 318                   | $\alpha$ -Phellandrene              | 4.75×10 <sup>5</sup> | 1.62×10 <sup>6</sup> | 1.90×10 <sup>6</sup> | 2.98×10 <sup>6</sup> | 1.27×10 <sup>6</sup> | 3.07×10 <sup>6</sup> | 2.57×10 <sup>6</sup> | 1.32×10 <sup>6</sup> | 1.67×10 <sup>5</sup> | 1.15×10 <sup>5</sup> | 1.61×10 <sup>5</sup> | 1.82×10 <sup>5</sup> | 3.45×10 <sup>5</sup> | 4.82×10 <sup>5</sup> | 3.07×10 <sup>5</sup> | 7.23×10 <sup>4</sup> |
| 319                   | $\alpha$ -Terpinene                 | 9.37×10 <sup>5</sup> | 2.91×10 <sup>6</sup> | 3.66×10 <sup>6</sup> | 3.72×10 <sup>6</sup> | 1.59×10 <sup>6</sup> | 4.83×10 <sup>6</sup> | 4.83×10 <sup>6</sup> | 2.33×10 <sup>6</sup> | 1.36×10 <sup>5</sup> | 4.91×10 <sup>5</sup> | 4.82×10 <sup>5</sup> | 2.05×10 <sup>5</sup> | 6.42×10 <sup>5</sup> | 6.36×10 <sup>5</sup> | 4.48×10 <sup>5</sup> | 7.51×10 <sup>4</sup> |
| 320                   | <i>p</i> -Cymene                    | 3.98×10 <sup>6</sup> | 7.02×10 <sup>6</sup> | 6.20×10 <sup>6</sup> | 7.79×10 <sup>6</sup> | 3.59×10 <sup>6</sup> | 4.40×10 <sup>6</sup> | 2.80×10 <sup>6</sup> | 7.41×10 <sup>6</sup> | 1.20×10 <sup>6</sup> | 2.53×10 <sup>6</sup> | 1.69×10 <sup>6</sup> | 1.63×10 <sup>6</sup> | 3.11×10 <sup>6</sup> | 2.34×10 <sup>6</sup> | 1.51×10 <sup>6</sup> | 1.46×10 <sup>6</sup> |
| 321                   | Limonene                            | 2.10×10 <sup>7</sup> | 3.02×10 <sup>7</sup> | 3.56×10 <sup>7</sup> | 3.06×10 <sup>7</sup> | 2.59×10 <sup>7</sup> | 4.16×10 <sup>7</sup> | 3.93×10 <sup>7</sup> | 2.48×10 <sup>7</sup> | 2.16×10 <sup>6</sup> | 4.70×10 <sup>6</sup> | 7.56×10 <sup>6</sup> | 6.02×10 <sup>6</sup> | 1.30×10 <sup>7</sup> | 1.40×10 <sup>7</sup> | 1.12×10 <sup>7</sup> | 6.06×10 <sup>6</sup> |
| 322                   | $\beta$ -Ocimene (isomer)           | 1.33×10 <sup>6</sup> | 2.73×10 <sup>6</sup> | 3.42×10 <sup>6</sup> | 3.16×10 <sup>6</sup> | 2.96×10 <sup>6</sup> | 4.22×10 <sup>6</sup> | 4.75×10 <sup>6</sup> | 2.45×10 <sup>6</sup> | 6.97×10 <sup>4</sup> | 3.85×10 <sup>5</sup> | 3.00×10 <sup>5</sup> | 1.41×10 <sup>5</sup> | 4.63×10 <sup>5</sup> | 5.07×10 <sup>5</sup> | 3.93×10 <sup>5</sup> | 7.84×10 <sup>4</sup> |
| 323                   | $\beta$ -Ocimene (isomer)           | 3.52×10 <sup>6</sup> | 1.52×10 <sup>7</sup> | 2.02×10 <sup>7</sup> | 1.37×10 <sup>7</sup> | 1.46×10 <sup>7</sup> | 2.84×10 <sup>7</sup> | 2.76×10 <sup>7</sup> | 1.18×10 <sup>7</sup> | 3.97×10 <sup>5</sup> | 2.55×10 <sup>6</sup> | 2.18×10 <sup>6</sup> | 9.79×10 <sup>5</sup> | 3.21×10 <sup>6</sup> | 3.77×10 <sup>6</sup> | 2.60×10 <sup>6</sup> | 6.80×10 <sup>5</sup> |
| 324                   | $\gamma$ -Terpinene                 | 8.63×10 <sup>5</sup> | 2.35×10 <sup>6</sup> | 2.94×10 <sup>6</sup> | 2.35×10 <sup>6</sup> | 2.17×10 <sup>6</sup> | 3.86×10 <sup>6</sup> | 3.79×10 <sup>6</sup> | 2.07×10 <sup>6</sup> | 7.37×10 <sup>4</sup> | 3.11×10 <sup>5</sup> | 4.45×10 <sup>5</sup> | 2.83×10 <sup>5</sup> | 8.63×10 <sup>5</sup> | 9.93×10 <sup>5</sup> | 7.29×10 <sup>5</sup> | 3.17×10 <sup>5</sup> |
| 325                   | $\alpha$ -Terpinolene               | 2.69×10 <sup>6</sup> | 6.84×10 <sup>6</sup> | 9.12×10 <sup>6</sup> | 6.83×10 <sup>6</sup> | 6.97×10 <sup>6</sup> | 1.41×10 <sup>7</sup> | 1.39×10 <sup>7</sup> | 6.23×10 <sup>6</sup> | 6.29×10 <sup>5</sup> | 1.91×10 <sup>6</sup> | 1.57×10 <sup>6</sup> | 7.15×10 <sup>5</sup> | 2.14×10 <sup>6</sup> | 2.74×10 <sup>6</sup> | 1.92×10 <sup>6</sup> | 5.22×10 <sup>5</sup> |
| 326                   | <i>p</i> -Cymenene                  | 5.63×10 <sup>6</sup> | 7.71×10 <sup>6</sup> | 6.20×10 <sup>6</sup> | 7.87×10 <sup>6</sup> | 6.04×10 <sup>6</sup> | 6.93×10 <sup>6</sup> | 1.91×10 <sup>6</sup> | 6.66×10 <sup>6</sup> | 3.00×10 <sup>6</sup> | 3.46×10 <sup>6</sup> | 4.19×10 <sup>6</sup> | 1.50×10 <sup>6</sup> | 3.40×10 <sup>5</sup> | 2.92×10 <sup>6</sup> | 1.66×10 <sup>6</sup> | 1.27×10 <sup>6</sup> |
| 327                   | Cosmene                             | 6.05×10 <sup>5</sup> | 1.05×10 <sup>6</sup> | 1.63×10 <sup>6</sup> | 1.35×10 <sup>6</sup> | 1.34×10 <sup>6</sup> | 1.18×10 <sup>6</sup> | 1.19×10 <sup>6</sup> | 1.43×10 <sup>6</sup> | 1.37×10 <sup>5</sup> | 5.46×10 <sup>5</sup> | 2.48×10 <sup>5</sup> | 2.22×10 <sup>5</sup> | 5.24×10 <sup>5</sup> | 3.17×10 <sup>5</sup> | 2.21×10 <sup>5</sup> | 1.52×10 <sup>5</sup> |
| 328                   | <i>Allo</i> -ocimene                | 8.44×10 <sup>5</sup> | 3.99×10 <sup>6</sup> | 4.75×10 <sup>6</sup> | 3.33×10 <sup>6</sup> | 3.87×10 <sup>6</sup> | 8.41×10 <sup>6</sup> | 7.05×10 <sup>6</sup> | 3.35×10 <sup>6</sup> | 2.93×10 <sup>5</sup> | 6.81×10 <sup>5</sup> | 6.66×10 <sup>5</sup> | 3.05×10 <sup>5</sup> | 1.03×10 <sup>6</sup> | 1.25×10 <sup>6</sup> | 8.88×10 <sup>5</sup> | 2.36×10 <sup>5</sup> |
| <i>Monoterpenoids</i> |                                     |                      |                      |                      |                      |                      |                      |                      |                      |                      |                      |                      |                      |                      |                      |                      |                      |
| 329                   | Linalool oxide (isomer)             | 1.28×10 <sup>7</sup> | 2.39×10 <sup>7</sup> | 3.56×10 <sup>7</sup> | 2.48×10 <sup>7</sup> | 3.04×10 <sup>7</sup> | 5.22×10 <sup>7</sup> | 4.91×10 <sup>7</sup> | 2.35×10 <sup>7</sup> | 4.68×10 <sup>6</sup> | 1.54×10 <sup>7</sup> | 1.22×10 <sup>7</sup> | 3.54×10 <sup>6</sup> | 1.44×10 <sup>7</sup> | 2.12×10 <sup>7</sup> | 1.59×10 <sup>7</sup> | 4.01×10 <sup>6</sup> |
| 330                   | Linalool oxide (isomer)             | 7.23×10 <sup>6</sup> | 1.44×10 <sup>7</sup> | 2.37×10 <sup>7</sup> | 2.93×10 <sup>7</sup> | 1.76×10 <sup>7</sup> | 3.23×10 <sup>7</sup> | 3.06×10 <sup>7</sup> | 1.39×10 <sup>7</sup> | 2.13×10 <sup>6</sup> | 4.79×10 <sup>6</sup> | 6.67×10 <sup>6</sup> | 2.40×10 <sup>6</sup> | 4.82×10 <sup>6</sup> | 8.04×10 <sup>6</sup> | 7.72×10 <sup>6</sup> | 4.89×10 <sup>6</sup> |
| 331                   | Linalool                            | 5.38×10 <sup>6</sup> | 1.20×10 <sup>7</sup> | 2.52×10 <sup>7</sup> | 1.46×10 <sup>7</sup> | 2.52×10 <sup>7</sup> | 3.37×10 <sup>7</sup> | 3.61×10 <sup>7</sup> | 1.60×10 <sup>7</sup> | 1.31×10 <sup>6</sup> | 1.96×10 <sup>7</sup> | 1.97×10 <sup>7</sup> | 7.43×10 <sup>6</sup> | 2.57×10 <sup>7</sup> | 3.12×10 <sup>7</sup> | 2.42×10 <sup>7</sup> | 1.55×10 <sup>5</sup> |
| 332                   | $\alpha$ -Terpineol                 | 1.20×10 <sup>6</sup> | 1.55×10 <sup>6</sup> | 2.47×10 <sup>6</sup> | 2.40×10 <sup>6</sup> | 3.84×10 <sup>6</sup> | 4.63×10 <sup>6</sup> | 4.84×10 <sup>6</sup> | 2.10×10 <sup>6</sup> | 2.54×10 <sup>6</sup> | 2.97×10 <sup>6</sup> | 3.32×10 <sup>6</sup> | 9.96×10 <sup>5</sup> | 1.04×10 <sup>7</sup> | 4.98×10 <sup>6</sup> | 3.76×10 <sup>6</sup> | 8.75×10 <sup>5</sup> |
| 333                   | Safranal                            | 7.60×10 <sup>5</sup> | 8.93×10 <sup>5</sup> | 6.50×10 <sup>5</sup> | 5.60×10 <sup>5</sup> | 5.66×10 <sup>5</sup> | 5.64×10 <sup>5</sup> | 6.73×10 <sup>5</sup> | 1.08×10 <sup>6</sup> | 1.42×10 <sup>6</sup> | 1.33×10 <sup>6</sup> | 6.57×10 <sup>5</sup> | 3.90×10 <sup>5</sup> | 9.61×10 <sup>5</sup> | 1.03×10 <sup>6</sup> | 6.41×10 <sup>5</sup> | 3.15×10 <sup>5</sup> |
| 334                   | <i>p</i> -Menth-1-en-9-al           | 3.69×10 <sup>6</sup> | 4.96×10 <sup>6</sup> | 6.51×10 <sup>6</sup> | 5.44×10 <sup>6</sup> | 6.90×10 <sup>6</sup> | 1.02×10 <sup>7</sup> | 1.13×10 <sup>7</sup> | 5.04×10 <sup>6</sup> | 6.10×10 <sup>6</sup> | 7.37×10 <sup>6</sup> | 6.03×10 <sup>6</sup> | 2.86×10 <sup>6</sup> | 9.05×10 <sup>6</sup> | 1.21×10 <sup>7</sup> | 8.07×10 <sup>6</sup> | 2.10×10 <sup>6</sup> |
| <i>Sesquiterpenes</i> |                                     |                      |                      |                      |                      |                      |                      |                      |                      |                      |                      |                      |                      |                      |                      |                      |                      |
| 335                   | $\alpha$ -Cubebene                  | 6.73×10 <sup>4</sup> | 6.38×10 <sup>4</sup> | 6.61×10 <sup>4</sup> | 1.33×10 <sup>5</sup> | 7.09×10 <sup>4</sup> | 1.00×10 <sup>5</sup> | 4.27×10 <sup>4</sup> | 8.70×10 <sup>4</sup> | 9.76×10 <sup>4</sup> | 1.89×10 <sup>5</sup> | 1.11×10 <sup>5</sup> | 3.50×10 <sup>4</sup> | 1.61×10 <sup>5</sup> | 1.08×10 <sup>5</sup> | 7.22×10 <sup>4</sup> | 2.47×10 <sup>5</sup> |
| 336                   | $\alpha$ -Copaene                   | 1.08×10 <sup>6</sup> | 1.36×10 <sup>6</sup> | 1.50×10 <sup>6</sup> | 1.66×10 <sup>6</sup> | 1.50×10 <sup>6</sup> | 1.60×10 <sup>6</sup> | 7.80×10 <sup>5</sup> | 1.53×10 <sup>6</sup> | n.d.                 |
| 337                   | Longifolene                         | 2.03×10 <sup>5</sup> | 2.51×10 <sup>5</sup> | 3.09×10 <sup>5</sup> | 1.59×10 <sup>5</sup> | 3.32×10 <sup>5</sup> | 1.67×10 <sup>6</sup> | 3.73×10 <sup>5</sup> | 2.78×10 <sup>5</sup> | 2.14×10 <sup>5</sup> | 1.00×10 <sup>6</sup> | 6.66×10 <sup>5</sup> | 1.17×10 <sup>5</sup> | 5.85×10 <sup>5</sup> | 5.35×10 <sup>5</sup> | 2.04×10 <sup>5</sup> | 3.54×10 <sup>5</sup> |
| 338                   | $\beta$ -Caryophyllene              | 3.46×10 <sup>5</sup> | 1.90×10 <sup>5</sup> | 5.68×10 <sup>5</sup> | 2.48×10 <sup>5</sup> | 2.98×10 <sup>5</sup> | 2.02×10 <sup>6</sup> | 3.73×10 <sup>5</sup> | 1.50×10 <sup>5</sup> | 1.62×10 <sup>5</sup> | 8.68×10 <sup>5</sup> | 2.17×10 <sup>5</sup> | 5.30×10 <sup>4</sup> | 2.09×10 <sup>5</sup> | 3.00×10 <sup>5</sup> | 1.55×10 <sup>5</sup> | 2.00×10 <sup>5</sup> |
| 339                   | $\alpha$ -Humulene                  | 2.18×10 <sup>5</sup> | 2.15×10 <sup>5</sup> | 1.97×10 <sup>5</sup> | 2.01×10 <sup>5</sup> | 2.03×10 <sup>5</sup> | 2.15×10 <sup>5</sup> | 1.91×10 <sup>5</sup> | 2.13×10 <sup>5</sup> | 1.33×10 <sup>5</sup> | 1.12×10 <sup>5</sup> | 1.29×10 <sup>5</sup> | 4.04×10 <sup>4</sup> | 1.16×10 <sup>5</sup> | 7.72×10 <sup>4</sup> | 3.99×10 <sup>4</sup> | 4.31×10 <sup>5</sup> |
| 340                   | $\alpha$ -Muurolene                 | 9.60×10 <sup>4</sup> | 7.01×10 <sup>4</sup> | 6.34×10 <sup>4</sup> | 5.27×10 <sup>4</sup> | 5.50×10 <sup>4</sup> | 6.61×10 <sup>4</sup> | 3.63×10 <sup>4</sup> | 6.23×10 <sup>4</sup> | 9.45×10 <sup>4</sup> | 4.92×10 <sup>4</sup> | 6.46×10 <sup>4</sup> | 9.26×10 <sup>3</sup> | 5.90×10 <sup>4</sup> | 4.53×10 <sup>4</sup> | 6.27×10 <sup>4</sup> | 4.69×10 <sup>4</sup> |

|                |                                                                 |                                |                                |                                |                               |                                |                               |                                |                                |                               |                                |                                |                                |                               |                                |                                |                                |
|----------------|-----------------------------------------------------------------|--------------------------------|--------------------------------|--------------------------------|-------------------------------|--------------------------------|-------------------------------|--------------------------------|--------------------------------|-------------------------------|--------------------------------|--------------------------------|--------------------------------|-------------------------------|--------------------------------|--------------------------------|--------------------------------|
| 341            | δ-Cadinene                                                      | 5.69×10 <sup>5</sup>           | 7.85×10 <sup>5</sup>           | 5.83×10 <sup>5</sup>           | 1.03×10 <sup>6</sup>          | 4.64×10 <sup>5</sup>           | 2.00×10 <sup>5</sup>          | 5.79×10 <sup>4</sup>           | 8.85×10 <sup>5</sup>           | 1.92×10 <sup>5</sup>          | 9.36×10 <sup>4</sup>           | 1.10×10 <sup>5</sup>           | 9.41×10 <sup>4</sup>           | 9.30×10 <sup>4</sup>          | 2.15×10 <sup>4</sup>           | 1.00×10 <sup>4</sup>           | 1.47×10 <sup>5</sup>           |
| Norisoprenoids |                                                                 | 9.90×10 <sup>6</sup><br>(10.2) | 1.54×10 <sup>7</sup><br>(22.0) | 1.85×10 <sup>7</sup><br>(15.2) | 1.75×10 <sup>7</sup><br>(7.5) | 1.56×10 <sup>7</sup><br>(4.2)  | 1.30×10 <sup>7</sup><br>(3.7) | 1.34×10 <sup>7</sup><br>(9.8)  | 1.68×10 <sup>7</sup><br>(24.0) | 1.52×10 <sup>7</sup><br>(8.1) | 1.69×10 <sup>7</sup><br>(19.3) | 9.36×10 <sup>6</sup><br>(20.1) | 6.31×10 <sup>6</sup><br>(30.5) | 1.23×10 <sup>7</sup><br>(7.0) | 9.65×10 <sup>6</sup><br>(6.1)  | 5.88×10 <sup>6</sup><br>(10.6) | 5.44×10 <sup>6</sup><br>(17.0) |
| 342            | Vitispirane (C <sub>13</sub> )                                  | 6.76×10 <sup>5</sup>           | 1.49×10 <sup>6</sup>           | 1.50×10 <sup>6</sup>           | 1.78×10 <sup>6</sup>          | 8.84×10 <sup>5</sup>           | 1.03×10 <sup>6</sup>          | 9.48×10 <sup>5</sup>           | 1.79×10 <sup>6</sup>           | 6.05×10 <sup>5</sup>          | 7.18×10 <sup>5</sup>           | 5.09×10 <sup>5</sup>           | 3.72×10 <sup>5</sup>           | 8.66×10 <sup>5</sup>          | 3.33×10 <sup>5</sup>           | 9.93×10 <sup>5</sup>           | 3.84×10 <sup>5</sup>           |
| 343            | Theaspirane (C <sub>13</sub> )                                  | 1.55×10 <sup>6</sup>           | 2.52×10 <sup>6</sup>           | 1.92×10 <sup>6</sup>           | 2.94×10 <sup>6</sup>          | 1.59×10 <sup>6</sup>           | 1.19×10 <sup>6</sup>          | 5.70×10 <sup>5</sup>           | 3.34×10 <sup>6</sup>           | 3.17×10 <sup>6</sup>          | 2.54×10 <sup>6</sup>           | 1.17×10 <sup>6</sup>           | 1.10×10 <sup>6</sup>           | 1.40×10 <sup>6</sup>          | 1.06×10 <sup>6</sup>           | 2.66×10 <sup>5</sup>           | 1.05×10 <sup>6</sup>           |
| 344            | 1,2-Dihydro-1,1,6-trimethylnaphthalene (TDN) (C <sub>13</sub> ) | 6.50×10 <sup>5</sup>           | 9.07×10 <sup>5</sup>           | 8.86×10 <sup>5</sup>           | 1.07×10 <sup>6</sup>          | 8.62×10 <sup>5</sup>           | 9.82×10 <sup>5</sup>          | 9.76×10 <sup>5</sup>           | 1.13×10 <sup>6</sup>           | 5.78×10 <sup>5</sup>          | 6.28×10 <sup>5</sup>           | 3.89×10 <sup>5</sup>           | 2.01×10 <sup>5</sup>           | 4.38×10 <sup>5</sup>          | 4.31×10 <sup>5</sup>           | 2.53×10 <sup>5</sup>           | 1.70×10 <sup>5</sup>           |
| 345            | β-Damascenone (C <sub>13</sub> )                                | 5.83×10 <sup>6</sup>           | 7.89×10 <sup>6</sup>           | 7.13×10 <sup>6</sup>           | 9.25×10 <sup>6</sup>          | 7.39×10 <sup>6</sup>           | 6.37×10 <sup>6</sup>          | 5.52×10 <sup>6</sup>           | 8.36×10 <sup>6</sup>           | 9.44×10 <sup>6</sup>          | 1.12×10 <sup>7</sup>           | 5.80×10 <sup>6</sup>           | 3.96×10 <sup>6</sup>           | 7.93×10 <sup>6</sup>          | 6.28×10 <sup>6</sup>           | 3.63×10 <sup>6</sup>           | 3.40×10 <sup>6</sup>           |
| 346            | α-Ionone (C <sub>13</sub> )                                     | 6.74×10 <sup>4</sup>           | 7.66×10 <sup>4</sup>           | 4.71×10 <sup>4</sup>           | 8.34×10 <sup>4</sup>          | 5.40×10 <sup>4</sup>           | 6.66×10 <sup>4</sup>          | 6.31×10 <sup>4</sup>           | 7.39×10 <sup>4</sup>           | 1.14×10 <sup>5</sup>          | 1.19×10 <sup>5</sup>           | 4.66×10 <sup>4</sup>           | 3.55×10 <sup>4</sup>           | 5.25×10 <sup>4</sup>          | 5.65×10 <sup>4</sup>           | 3.78×10 <sup>4</sup>           | 2.46×10 <sup>4</sup>           |
| 347            | Geranyl acetone (C <sub>13</sub> )                              | 1.13×10 <sup>6</sup>           | 2.51×10 <sup>6</sup>           | 7.05×10 <sup>6</sup>           | 2.42×10 <sup>6</sup>          | 4.78×10 <sup>6</sup>           | 3.34×10 <sup>6</sup>          | 5.28×10 <sup>6</sup>           | 2.12×10 <sup>6</sup>           | 1.30×10 <sup>6</sup>          | 1.65×10 <sup>6</sup>           | 1.45×10 <sup>6</sup>           | 6.45×10 <sup>5</sup>           | 1.56×10 <sup>6</sup>          | 1.50×10 <sup>6</sup>           | 6.96×10 <sup>5</sup>           | 4.13×10 <sup>5</sup>           |
| Thiazoles      |                                                                 | 1.14×10 <sup>8</sup><br>(9.7)  | 1.64×10 <sup>8</sup><br>(26.2) | 1.32×10 <sup>8</sup><br>(5.4)  | 1.79×10 <sup>8</sup><br>(4.6) | 8.22×10 <sup>7</sup><br>(34.0) | 1.13×10 <sup>8</sup><br>(1.4) | 9.31×10 <sup>7</sup><br>(10.3) | 1.30×10 <sup>8</sup><br>(31.9) | 1.17×10 <sup>8</sup><br>(3.8) | 1.57×10 <sup>8</sup><br>(11.2) | 7.17×10 <sup>7</sup><br>(32.0) | 3.98×10 <sup>7</sup><br>(15.9) | 1.13×10 <sup>8</sup><br>(7.1) | 1.09×10 <sup>8</sup><br>(18.3) | 5.10×10 <sup>7</sup><br>(17.3) | 4.25×10 <sup>7</sup><br>(8.2)  |
| 348            | Thiazole                                                        | 7.51×10 <sup>6</sup>           | 9.78×10 <sup>6</sup>           | 9.78×10 <sup>6</sup>           | 9.89×10 <sup>6</sup>          | 3.69×10 <sup>6</sup>           | 7.95×10 <sup>6</sup>          | 6.17×10 <sup>6</sup>           | 7.77×10 <sup>6</sup>           | 8.42×10 <sup>6</sup>          | 5.62×10 <sup>6</sup>           | 4.23×10 <sup>6</sup>           | 2.07×10 <sup>6</sup>           | 6.44×10 <sup>6</sup>          | 5.79×10 <sup>6</sup>           | 3.39×10 <sup>6</sup>           | 2.15×10 <sup>6</sup>           |
| 349            | 2-Methylthiazole                                                | 2.08×10 <sup>6</sup>           | 2.82×10 <sup>6</sup>           | 2.94×10 <sup>6</sup>           | 2.97×10 <sup>6</sup>          | 1.01×10 <sup>6</sup>           | 2.40×10 <sup>6</sup>          | 1.63×10 <sup>6</sup>           | 2.01×10 <sup>6</sup>           | 3.28×10 <sup>6</sup>          | 3.26×10 <sup>6</sup>           | 1.45×10 <sup>6</sup>           | 1.08×10 <sup>6</sup>           | 2.90×10 <sup>6</sup>          | 2.88×10 <sup>6</sup>           | 1.22×10 <sup>6</sup>           | 1.00×10 <sup>6</sup>           |
| 350            | 4-Methylthiazole                                                | 1.64×10 <sup>7</sup>           | 2.89×10 <sup>7</sup>           | 2.80×10 <sup>7</sup>           | 2.95×10 <sup>7</sup>          | 1.03×10 <sup>7</sup>           | 2.18×10 <sup>7</sup>          | 1.86×10 <sup>7</sup>           | 2.03×10 <sup>7</sup>           | 2.43×10 <sup>7</sup>          | 3.39×10 <sup>7</sup>           | 1.49×10 <sup>7</sup>           | 8.07×10 <sup>6</sup>           | 2.47×10 <sup>7</sup>          | 2.10×10 <sup>7</sup>           | 1.07×10 <sup>7</sup>           | 9.48×10 <sup>6</sup>           |
| 351            | 5-Methylthiazole                                                | 2.02×10 <sup>5</sup>           | 6.96×10 <sup>5</sup>           | 7.02×10 <sup>5</sup>           | 7.54×10 <sup>5</sup>          | 1.21×10 <sup>5</sup>           | 3.03×10 <sup>5</sup>          | 2.22×10 <sup>5</sup>           | 3.31×10 <sup>5</sup>           | 1.27×10 <sup>6</sup>          | 1.76×10 <sup>6</sup>           | 5.67×10 <sup>5</sup>           | 4.24×10 <sup>5</sup>           | 9.52×10 <sup>5</sup>          | 7.96×10 <sup>5</sup>           | 2.54×10 <sup>5</sup>           | 4.31×10 <sup>5</sup>           |
| 352            | 2,4-Dimethylthiazole                                            | 8.57×10 <sup>6</sup>           | 1.21×10 <sup>7</sup>           | 1.08×10 <sup>7</sup>           | 1.23×10 <sup>7</sup>          | 3.74×10 <sup>6</sup>           | 7.95×10 <sup>6</sup>          | 5.87×10 <sup>6</sup>           | 9.29×10 <sup>6</sup>           | 8.31×10 <sup>6</sup>          | 1.41×10 <sup>7</sup>           | 5.93×10 <sup>6</sup>           | 3.34×10 <sup>6</sup>           | 9.51×10 <sup>6</sup>          | 8.27×10 <sup>6</sup>           | 3.37×10 <sup>6</sup>           | 3.65×10 <sup>6</sup>           |
| 353            | 2,5-Dimethylthiazole                                            | 4.50×10 <sup>6</sup>           | 7.61×10 <sup>6</sup>           | 4.68×10 <sup>6</sup>           | 5.76×10 <sup>6</sup>          | 3.91×10 <sup>6</sup>           | 5.29×10 <sup>6</sup>          | 3.07×10 <sup>6</sup>           | 5.68×10 <sup>6</sup>           | 4.86×10 <sup>6</sup>          | 6.79×10 <sup>6</sup>           | 3.06×10 <sup>6</sup>           | 1.88×10 <sup>6</sup>           | 4.64×10 <sup>6</sup>          | 5.60×10 <sup>6</sup>           | 1.97×10 <sup>6</sup>           | 1.59×10 <sup>6</sup>           |
| 354            | 4,5-Dimethylthiazole                                            | 5.20×10 <sup>6</sup>           | 6.17×10 <sup>6</sup>           | 6.00×10 <sup>6</sup>           | 6.87×10 <sup>6</sup>          | 2.92×10 <sup>6</sup>           | 4.55×10 <sup>6</sup>          | 3.58×10 <sup>6</sup>           | 5.79×10 <sup>6</sup>           | 5.67×10 <sup>6</sup>          | 8.53×10 <sup>6</sup>           | 3.78×10 <sup>6</sup>           | 1.92×10 <sup>6</sup>           | 5.73×10 <sup>6</sup>          | 5.33×10 <sup>6</sup>           | 2.23×10 <sup>6</sup>           | 2.00×10 <sup>6</sup>           |
| 355            | 5-Ethylthiazole                                                 | 3.07×10 <sup>6</sup>           | 3.70×10 <sup>6</sup>           | 3.81×10 <sup>6</sup>           | 4.30×10 <sup>6</sup>          | 2.06×10 <sup>6</sup>           | 2.94×10 <sup>6</sup>          | 2.41×10 <sup>6</sup>           | 3.39×10 <sup>6</sup>           | 5.14×10 <sup>6</sup>          | 6.54×10 <sup>6</sup>           | 3.16×10 <sup>6</sup>           | 1.68×10 <sup>6</sup>           | 4.79×10 <sup>6</sup>          | 4.41×10 <sup>6</sup>           | 2.15×10 <sup>6</sup>           | 1.75×10 <sup>6</sup>           |
| 356            | 2-Ethyl-4-methylthiazole                                        | 3.92×10 <sup>6</sup>           | 4.52×10 <sup>6</sup>           | 3.77×10 <sup>6</sup>           | 5.35×10 <sup>6</sup>          | 2.27×10 <sup>6</sup>           | 3.32×10 <sup>6</sup>          | 2.58×10 <sup>6</sup>           | 4.38×10 <sup>6</sup>           | 2.81×10 <sup>6</sup>          | 6.11×10 <sup>6</sup>           | 2.22×10 <sup>6</sup>           | 1.68×10 <sup>6</sup>           | 3.88×10 <sup>6</sup>          | 2.64×10 <sup>6</sup>           | 1.24×10 <sup>6</sup>           | 1.82×10 <sup>6</sup>           |
| 357            | 4-Propylthiazole                                                | 2.03×10 <sup>6</sup>           | 9.22×10 <sup>5</sup>           | 2.43×10 <sup>5</sup>           | 5.61×10 <sup>5</sup>          | 1.03×10 <sup>5</sup>           | 5.84×10 <sup>5</sup>          | 3.61×10 <sup>5</sup>           | 6.09×10 <sup>5</sup>           | 6.41×10 <sup>5</sup>          | 6.17×10 <sup>5</sup>           | 4.14×10 <sup>5</sup>           | 1.98×10 <sup>5</sup>           | 6.23×10 <sup>5</sup>          | 5.11×10 <sup>5</sup>           | 1.93×10 <sup>5</sup>           | 2.30×10 <sup>5</sup>           |
| 358            | 5-Ethyl-2-methylthiazole                                        | 4.11×10 <sup>6</sup>           | 5.54×10 <sup>6</sup>           | 2.54×10 <sup>6</sup>           | 1.06×10 <sup>7</sup>          | 2.10×10 <sup>6</sup>           | 3.04×10 <sup>6</sup>          | 1.33×10 <sup>6</sup>           | 3.91×10 <sup>6</sup>           | 4.43×10 <sup>6</sup>          | 6.94×10 <sup>6</sup>           | 2.95×10 <sup>6</sup>           | 2.17×10 <sup>6</sup>           | 3.90×10 <sup>6</sup>          | 3.81×10 <sup>6</sup>           | 1.82×10 <sup>6</sup>           | 1.99×10 <sup>6</sup>           |
| 359            | 2-Isopropyl-4-methylthiazole                                    | 9.86×10 <sup>5</sup>           | 1.30×10 <sup>6</sup>           | 1.10×10 <sup>6</sup>           | 1.66×10 <sup>6</sup>          | 5.14×10 <sup>5</sup>           | 6.09×10 <sup>5</sup>          | 5.05×10 <sup>5</sup>           | 1.74×10 <sup>6</sup>           | 5.67×10 <sup>5</sup>          | 1.20×10 <sup>6</sup>           | 6.87×10 <sup>5</sup>           | 3.07×10 <sup>5</sup>           | 7.94×10 <sup>5</sup>          | 6.57×10 <sup>5</sup>           | 2.55×10 <sup>5</sup>           | 4.19×10 <sup>5</sup>           |
| 360            | 5-Ethyl-4-methylthiazole                                        | 6.42×10 <sup>6</sup>           | 5.01×10 <sup>6</sup>           | 1.30×10 <sup>6</sup>           | 1.36×10 <sup>7</sup>          | 3.22×10 <sup>6</sup>           | 1.44×10 <sup>6</sup>          | 2.58×10 <sup>6</sup>           | 6.63×10 <sup>5</sup>           | 9.88×10 <sup>6</sup>          | 1.34×10 <sup>7</sup>           | 5.08×10 <sup>6</sup>           | 3.36×10 <sup>6</sup>           | 8.99×10 <sup>6</sup>          | 1.26×10 <sup>7</sup>           | 4.60×10 <sup>6</sup>           | 3.71×10 <sup>6</sup>           |
| 361            | 2-Acetylthiazole                                                | 1.91×10 <sup>7</sup>           | 2.02×10 <sup>7</sup>           | 2.02×10 <sup>7</sup>           | 2.35×10 <sup>7</sup>          | 1.59×10 <sup>7</sup>           | 1.93×10 <sup>7</sup>          | 1.83×10 <sup>7</sup>           | 1.87×10 <sup>7</sup>           | 1.54×10 <sup>7</sup>          | 1.77×10 <sup>7</sup>           | 8.33×10 <sup>6</sup>           | 3.87×10 <sup>6</sup>           | 1.35×10 <sup>7</sup>          | 1.36×10 <sup>7</sup>           | 7.93×10 <sup>6</sup>           | 4.29×10 <sup>6</sup>           |
| 362            | 4-Ethyl-2,5-dimethylthiazole                                    | 7.09×10 <sup>5</sup>           | 1.08×10 <sup>6</sup>           | 6.75×10 <sup>5</sup>           | 1.01×10 <sup>6</sup>          | 4.54×10 <sup>5</sup>           | 6.29×10 <sup>5</sup>          | 5.59×10 <sup>5</sup>           | 9.69×10 <sup>5</sup>           | 6.71×10 <sup>5</sup>          | 1.01×10 <sup>6</sup>           | 5.39×10 <sup>5</sup>           | 2.67×10 <sup>5</sup>           | 7.43×10 <sup>5</sup>          | 7.06×10 <sup>5</sup>           | 3.10×10 <sup>5</sup>           | 3.10×10 <sup>5</sup>           |
| 363            | 5-Ethyl-2,4-dimethylthiazole                                    | 6.96×10 <sup>6</sup>           | 2.17×10 <sup>7</sup>           | 3.74×10 <sup>6</sup>           | 6.63×10 <sup>6</sup>          | 3.94×10 <sup>6</sup>           | 4.01×10 <sup>6</sup>          | 2.59×10 <sup>6</sup>           | 5.69×10 <sup>6</sup>           | 3.75×10 <sup>6</sup>          | 3.85×10 <sup>6</sup>           | 1.93×10 <sup>6</sup>           | 1.20×10 <sup>6</sup>           | 3.47×10 <sup>6</sup>          | 3.19×10 <sup>6</sup>           | 8.62×10 <sup>5</sup>           | 8.57×10 <sup>5</sup>           |
| 364            | 2-Acetyl-4-methylthiazole                                       | 1.73×10 <sup>7</sup>           | 2.66×10 <sup>7</sup>           | 2.67×10 <sup>7</sup>           | 3.79×10 <sup>7</sup>          | 2.06×10 <sup>7</sup>           | 2.10×10 <sup>7</sup>          | 1.72×10 <sup>7</sup>           | 3.27×10 <sup>7</sup>           | 1.06×10 <sup>7</sup>          | 1.89×10 <sup>7</sup>           | 8.99×10 <sup>6</sup>           | 4.61×10 <sup>6</sup>           | 1.17×10 <sup>7</sup>          | 1.12×10 <sup>7</sup>           | 5.30×10 <sup>6</sup>           | 5.34×10 <sup>6</sup>           |
| 365            | 2-Propanoyl-thiazole                                            | 5.19×10 <sup>6</sup>           | 5.29×10 <sup>6</sup>           | 5.52×10 <sup>6</sup>           | 6.33×10 <sup>6</sup>          | 5.38×10 <sup>6</sup>           | 5.35×10 <sup>6</sup>          | 5.56×10 <sup>6</sup>           | 5.77×10 <sup>6</sup>           | 3.25×10 <sup>6</sup>          | 3.66×10 <sup>6</sup>           | 2.00×10 <sup>6</sup>           | 8.59×10 <sup>5</sup>           | 3.68×10 <sup>6</sup>          | 3.13×10 <sup>6</sup>           | 1.84×10 <sup>6</sup>           | 1.05×10 <sup>6</sup>           |
| 366            | Benzothiazole                                                   | n.d.                           | n.d.                           | n.d.                           | n.d.                          | n.d.                           | n.d.                          | n.d.                           | n.d.                           | 4.12×10 <sup>6</sup>          | 3.13×10 <sup>6</sup>           | 1.49×10 <sup>6</sup>           | 7.74×10 <sup>5</sup>           | 2.31×10 <sup>6</sup>          | 2.51×10 <sup>6</sup>           | 1.39×10 <sup>6</sup>           | 4.24×10 <sup>5</sup>           |

| Tiophene compounds |                                    | 2.07×10 <sup>8</sup><br>(14.6) | 2.48×10 <sup>8</sup><br>(2.5) | 2.40×10 <sup>8</sup><br>(9.8) | 2.33×10 <sup>8</sup><br>(3.4) | 1.63×10 <sup>8</sup><br>(10.5) | 2.18×10 <sup>8</sup><br>(9.4) | 1.91×10 <sup>8</sup><br>(8.7) | 1.86×10 <sup>8</sup><br>(9.8) | 3.35×10 <sup>8</sup><br>(4.3) | 3.44×10 <sup>8</sup><br>(7.5) | 1.72×10 <sup>8</sup><br>(21.8) | 1.13×10 <sup>8</sup><br>(26.7) | 2.69×10 <sup>8</sup><br>(15.3) | 2.55×10 <sup>8</sup><br>(15.3) | 1.41×10 <sup>8</sup><br>(22.8) | 8.21×10 <sup>7</sup><br>(4.1) |
|--------------------|------------------------------------|--------------------------------|-------------------------------|-------------------------------|-------------------------------|--------------------------------|-------------------------------|-------------------------------|-------------------------------|-------------------------------|-------------------------------|--------------------------------|--------------------------------|--------------------------------|--------------------------------|--------------------------------|-------------------------------|
| 367                | Thiophene                          | 5.47×10 <sup>6</sup>           | 6.96×10 <sup>6</sup>          | 8.02×10 <sup>6</sup>          | 2.84×10 <sup>6</sup>          | 5.41×10 <sup>5</sup>           | 6.91×10 <sup>6</sup>          | 3.76×10 <sup>6</sup>          | 2.23×10 <sup>6</sup>          | 4.98×10 <sup>7</sup>          | 3.97×10 <sup>7</sup>          | 2.06×10 <sup>7</sup>           | 2.26×10 <sup>7</sup>           | 3.34×10 <sup>7</sup>           | 2.96×10 <sup>7</sup>           | 1.25×10 <sup>7</sup>           | 1.25×10 <sup>7</sup>          |
| 368                | 2-Methylthiophene                  | 9.50×10 <sup>6</sup>           | 1.50×10 <sup>7</sup>          | 1.62×10 <sup>7</sup>          | 7.83×10 <sup>6</sup>          | 2.13×10 <sup>6</sup>           | 1.52×10 <sup>7</sup>          | 6.67×10 <sup>6</sup>          | 3.59×10 <sup>6</sup>          | 4.22×10 <sup>7</sup>          | 3.47×10 <sup>7</sup>          | 2.20×10 <sup>7</sup>           | 1.91×10 <sup>7</sup>           | 3.93×10 <sup>7</sup>           | 2.82×10 <sup>7</sup>           | 1.36×10 <sup>7</sup>           | 7.83×10 <sup>6</sup>          |
| 369                | 3-Methylthiophene                  | 2.49×10 <sup>6</sup>           | 3.98×10 <sup>6</sup>          | 3.92×10 <sup>6</sup>          | 2.30×10 <sup>6</sup>          | 5.58×10 <sup>5</sup>           | 3.31×10 <sup>6</sup>          | 2.43×10 <sup>6</sup>          | 1.38×10 <sup>6</sup>          | 1.31×10 <sup>7</sup>          | 2.04×10 <sup>7</sup>          | 8.93×10 <sup>6</sup>           | 3.81×10 <sup>6</sup>           | 8.78×10 <sup>6</sup>           | 7.16×10 <sup>6</sup>           | 3.04×10 <sup>6</sup>           | 2.26×10 <sup>6</sup>          |
| 370                | 2-Ethylthiophene                   | 1.31×10 <sup>6</sup>           | 1.85×10 <sup>6</sup>          | 1.88×10 <sup>6</sup>          | 1.44×10 <sup>6</sup>          | 3.91×10 <sup>5</sup>           | 1.56×10 <sup>6</sup>          | 1.10×10 <sup>6</sup>          | 7.60×10 <sup>5</sup>          | 1.77×10 <sup>6</sup>          | 1.57×10 <sup>6</sup>          | 1.11×10 <sup>6</sup>           | 8.97×10 <sup>5</sup>           | 2.50×10 <sup>6</sup>           | 2.31×10 <sup>6</sup>           | 7.86×10 <sup>5</sup>           | 6.00×10 <sup>5</sup>          |
| 371                | 2,5-Dimethylthiophene              | 1.88×10 <sup>6</sup>           | 1.90×10 <sup>6</sup>          | 1.87×10 <sup>6</sup>          | 1.99×10 <sup>6</sup>          | 1.58×10 <sup>5</sup>           | 2.25×10 <sup>6</sup>          | 1.58×10 <sup>6</sup>          | 1.71×10 <sup>6</sup>          | 1.16×10 <sup>6</sup>          | 1.76×10 <sup>6</sup>          | 1.09×10 <sup>6</sup>           | 9.24×10 <sup>5</sup>           | 2.06×10 <sup>6</sup>           | 1.49×10 <sup>6</sup>           | 8.38×10 <sup>5</sup>           | 4.81×10 <sup>5</sup>          |
| 372                | 2,4-Dimethylthiophene              | 1.93×10 <sup>6</sup>           | 3.52×10 <sup>6</sup>          | 3.13×10 <sup>6</sup>          | 2.70×10 <sup>6</sup>          | 8.15×10 <sup>5</sup>           | 2.88×10 <sup>6</sup>          | 2.08×10 <sup>6</sup>          | 1.54×10 <sup>6</sup>          | 3.01×10 <sup>6</sup>          | 5.25×10 <sup>6</sup>          | 2.33×10 <sup>6</sup>           | 1.92×10 <sup>6</sup>           | 4.09×10 <sup>6</sup>           | 4.56×10 <sup>6</sup>           | 1.54×10 <sup>6</sup>           | 1.10×10 <sup>6</sup>          |
| 373                | 2,3-Dimethylthiophene              | 1.67×10 <sup>6</sup>           | 1.56×10 <sup>6</sup>          | 1.64×10 <sup>6</sup>          | 1.24×10 <sup>6</sup>          | 4.34×10 <sup>5</sup>           | 1.54×10 <sup>6</sup>          | 1.02×10 <sup>6</sup>          | 7.80×10 <sup>5</sup>          | 2.67×10 <sup>6</sup>          | 3.14×10 <sup>6</sup>          | 1.81×10 <sup>6</sup>           | 1.65×10 <sup>6</sup>           | 3.26×10 <sup>6</sup>           | 2.48×10 <sup>6</sup>           | 1.14×10 <sup>6</sup>           | 6.85×10 <sup>5</sup>          |
| 374                | 2-Vinylthiophene                   | 5.69×10 <sup>6</sup>           | 6.50×10 <sup>6</sup>          | 5.94×10 <sup>6</sup>          | 5.48×10 <sup>6</sup>          | 1.75×10 <sup>6</sup>           | 4.33×10 <sup>6</sup>          | 3.33×10 <sup>6</sup>          | 4.38×10 <sup>6</sup>          | 1.04×10 <sup>7</sup>          | 1.47×10 <sup>7</sup>          | 7.23×10 <sup>6</sup>           | 5.30×10 <sup>6</sup>           | 1.08×10 <sup>7</sup>           | 8.96×10 <sup>6</sup>           | 5.17×10 <sup>6</sup>           | 3.88×10 <sup>6</sup>          |
| 375                | 3-Methoxythiophene                 | 1.50×10 <sup>5</sup>           | 1.27×10 <sup>5</sup>          | 1.14×10 <sup>5</sup>          | 1.03×10 <sup>5</sup>          | 3.93×10 <sup>4</sup>           | 7.15×10 <sup>4</sup>          | 6.66×10 <sup>4</sup>          | 1.15×10 <sup>5</sup>          | 6.18×10 <sup>5</sup>          | 7.09×10 <sup>5</sup>          | 2.62×10 <sup>5</sup>           | 1.30×10 <sup>5</sup>           | 3.66×10 <sup>5</sup>           | 2.99×10 <sup>5</sup>           | 1.19×10 <sup>5</sup>           | 1.20×10 <sup>5</sup>          |
| 376                | 3-Thiophanone                      | 3.11×10 <sup>6</sup>           | 5.57×10 <sup>6</sup>          | 6.74×10 <sup>6</sup>          | 5.83×10 <sup>6</sup>          | 6.79×10 <sup>5</sup>           | 6.43×10 <sup>6</sup>          | 2.53×10 <sup>6</sup>          | 2.75×10 <sup>6</sup>          | 4.26×10 <sup>6</sup>          | 4.16×10 <sup>6</sup>          | 1.40×10 <sup>6</sup>           | 1.52×10 <sup>6</sup>           | 2.72×10 <sup>6</sup>           | 2.43×10 <sup>6</sup>           | 1.13×10 <sup>6</sup>           | 1.26×10 <sup>6</sup>          |
| 377                | 2-Isopropylthiophene               | 6.18×10 <sup>6</sup>           | 6.39×10 <sup>6</sup>          | 5.90×10 <sup>6</sup>          | 5.63×10 <sup>6</sup>          | 2.26×10 <sup>6</sup>           | 5.27×10 <sup>6</sup>          | 4.18×10 <sup>6</sup>          | 4.58×10 <sup>6</sup>          | 2.85×10 <sup>6</sup>          | 4.55×10 <sup>6</sup>          | 2.63×10 <sup>6</sup>           | 2.03×10 <sup>6</sup>           | 4.82×10 <sup>6</sup>           | 4.29×10 <sup>6</sup>           | 2.08×10 <sup>6</sup>           | 1.38×10 <sup>6</sup>          |
| 378                | 2,3,4-Trimethylthiophene           | 8.49×10 <sup>5</sup>           | 9.85×10 <sup>5</sup>          | 1.00×10 <sup>6</sup>          | 8.55×10 <sup>5</sup>          | 3.69×10 <sup>5</sup>           | 9.18×10 <sup>5</sup>          | 6.64×10 <sup>5</sup>          | 5.53×10 <sup>5</sup>          | 5.86×10 <sup>5</sup>          | 7.86×10 <sup>5</sup>          | 4.61×10 <sup>5</sup>           | 2.07×10 <sup>5</sup>           | 6.66×10 <sup>5</sup>           | 5.44×10 <sup>5</sup>           | 2.50×10 <sup>5</sup>           | 9.73×10 <sup>4</sup>          |
| 379                | Dihydro-2-methyl-3(2H)-thiophenone | 1.71×10 <sup>7</sup>           | 2.78×10 <sup>7</sup>          | 2.79×10 <sup>7</sup>          | 2.72×10 <sup>7</sup>          | 6.77×10 <sup>6</sup>           | 2.66×10 <sup>7</sup>          | 1.89×10 <sup>7</sup>          | 1.63×10 <sup>7</sup>          | 3.08×10 <sup>7</sup>          | 3.53×10 <sup>7</sup>          | 1.50×10 <sup>7</sup>           | 1.09×10 <sup>7</sup>           | 2.71×10 <sup>7</sup>           | 3.06×10 <sup>7</sup>           | 2.02×10 <sup>7</sup>           | 9.16×10 <sup>6</sup>          |
| 380                | 3-Thiophenecarboxaldehyde          | 1.78×10 <sup>6</sup>           | 2.21×10 <sup>6</sup>          | 2.63×10 <sup>6</sup>          | 2.53×10 <sup>6</sup>          | 2.16×10 <sup>6</sup>           | 1.89×10 <sup>6</sup>          | 2.00×10 <sup>6</sup>          | 2.10×10 <sup>6</sup>          | 1.86×10 <sup>6</sup>          | 2.28×10 <sup>6</sup>          | 9.64×10 <sup>5</sup>           | 4.80×10 <sup>5</sup>           | 1.91×10 <sup>6</sup>           | 1.55×10 <sup>6</sup>           | 9.97×10 <sup>5</sup>           | 2.89×10 <sup>5</sup>          |
| 381                | Dihydro-2(3H)-thiophenone          | 9.24×10 <sup>6</sup>           | 7.76×10 <sup>6</sup>          | 7.53×10 <sup>6</sup>          | 6.97×10 <sup>6</sup>          | 5.20×10 <sup>6</sup>           | 8.31×10 <sup>6</sup>          | 7.12×10 <sup>6</sup>          | 6.59×10 <sup>6</sup>          | 5.48×10 <sup>6</sup>          | 5.49×10 <sup>6</sup>          | 2.81×10 <sup>6</sup>           | 1.79×10 <sup>6</sup>           | 3.54×10 <sup>6</sup>           | 4.09×10 <sup>6</sup>           | 2.10×10 <sup>6</sup>           | 1.81×10 <sup>6</sup>          |
| 382                | 2-Thiophenecarboxaldehyde          | 5.00×10 <sup>7</sup>           | 5.29×10 <sup>7</sup>          | 5.85×10 <sup>7</sup>          | 5.80×10 <sup>7</sup>          | 5.83×10 <sup>7</sup>           | 5.20×10 <sup>7</sup>          | 5.71×10 <sup>7</sup>          | 4.40×10 <sup>7</sup>          | 7.15×10 <sup>7</sup>          | 6.42×10 <sup>7</sup>          | 3.06×10 <sup>7</sup>           | 1.53×10 <sup>7</sup>           | 5.09×10 <sup>7</sup>           | 5.25×10 <sup>7</sup>           | 3.12×10 <sup>7</sup>           | 1.57×10 <sup>7</sup>          |
| 383                | 3-Methyl-2-thiophenecarboxaldehyde | 1.10×10 <sup>7</sup>           | 1.20×10 <sup>7</sup>          | 1.27×10 <sup>7</sup>          | 1.38×10 <sup>7</sup>          | 1.02×10 <sup>7</sup>           | 1.05×10 <sup>7</sup>          | 1.03×10 <sup>7</sup>          | 9.29×10 <sup>6</sup>          | 1.54×10 <sup>7</sup>          | 1.99×10 <sup>7</sup>          | 1.04×10 <sup>7</sup>           | 4.64×10 <sup>6</sup>           | 1.49×10 <sup>7</sup>           | 1.40×10 <sup>7</sup>           | 8.13×10 <sup>6</sup>           | 4.69×10 <sup>6</sup>          |
| 384                | 3-Acetylthiophene                  | 2.81×10 <sup>7</sup>           | 1.67×10 <sup>7</sup>          | 2.09×10 <sup>7</sup>          | 3.02×10 <sup>7</sup>          | 1.83×10 <sup>7</sup>           | 1.92×10 <sup>7</sup>          | 2.18×10 <sup>7</sup>          | 2.24×10 <sup>7</sup>          | 1.42×10 <sup>7</sup>          | 1.69×10 <sup>7</sup>          | 8.37×10 <sup>6</sup>           | 3.64×10 <sup>6</sup>           | 1.34×10 <sup>7</sup>           | 1.24×10 <sup>7</sup>           | 8.55×10 <sup>6</sup>           | 3.64×10 <sup>6</sup>          |
| 385                | 2-Acetylthiophene                  | 2.89×10 <sup>7</sup>           | 4.26×10 <sup>7</sup>          | 3.32×10 <sup>7</sup>          | 3.21×10 <sup>7</sup>          | 3.29×10 <sup>7</sup>           | 2.87×10 <sup>7</sup>          | 2.51×10 <sup>7</sup>          | 3.62×10 <sup>7</sup>          | 3.31×10 <sup>7</sup>          | 3.31×10 <sup>7</sup>          | 2.08×10 <sup>7</sup>           | 8.58×10 <sup>6</sup>           | 2.72×10 <sup>7</sup>           | 2.56×10 <sup>7</sup>           | 1.31×10 <sup>7</sup>           | 9.32×10 <sup>6</sup>          |
| 386                | 2,5-Diethylthiophene               | 2.71×10 <sup>6</sup>           | 3.20×10 <sup>6</sup>          | 2.82×10 <sup>6</sup>          | 2.80×10 <sup>6</sup>          | 1.96×10 <sup>6</sup>           | 2.99×10 <sup>6</sup>          | 2.54×10 <sup>6</sup>          | 2.74×10 <sup>6</sup>          | 1.25×10 <sup>6</sup>          | 1.55×10 <sup>6</sup>          | 1.16×10 <sup>6</sup>           | 5.96×10 <sup>5</sup>           | 1.50×10 <sup>6</sup>           | 1.35×10 <sup>6</sup>           | 8.18×10 <sup>5</sup>           | 5.44×10 <sup>5</sup>          |
| 387                | Methyl-2-thiophene carboxylate     | 2.30×10 <sup>6</sup>           | 2.33×10 <sup>6</sup>          | 2.18×10 <sup>6</sup>          | 2.48×10 <sup>6</sup>          | 1.75×10 <sup>6</sup>           | 2.07×10 <sup>6</sup>          | 1.89×10 <sup>6</sup>          | 2.53×10 <sup>6</sup>          | 3.07×10 <sup>6</sup>          | 4.27×10 <sup>6</sup>          | 2.27×10 <sup>6</sup>           | 9.24×10 <sup>5</sup>           | 2.78×10 <sup>6</sup>           | 3.73×10 <sup>6</sup>           | 1.48×10 <sup>6</sup>           | 9.66×10 <sup>5</sup>          |
| 388                | 5-Methyl-2-thiophenecarboxaldehyde | 7.81×10 <sup>6</sup>           | 7.44×10 <sup>6</sup>          | 7.96×10 <sup>6</sup>          | 8.52×10 <sup>6</sup>          | 7.30×10 <sup>6</sup>           | 6.91×10 <sup>6</sup>          | 6.91×10 <sup>6</sup>          | 7.45×10 <sup>6</sup>          | 1.03×10 <sup>7</sup>          | 1.03×10 <sup>7</sup>          | 5.56×10 <sup>6</sup>           | 2.05×10 <sup>6</sup>           | 7.07×10 <sup>6</sup>           | 6.39×10 <sup>6</sup>           | 3.46×10 <sup>6</sup>           | 2.23×10 <sup>6</sup>          |
| 389                | 2-Pentylthiophene                  | 1.40×10 <sup>6</sup>           | 9.20×10 <sup>5</sup>          | 1.09×10 <sup>6</sup>          | 1.49×10 <sup>6</sup>          | 1.20×10 <sup>6</sup>           | 1.25×10 <sup>6</sup>          | 7.20×10 <sup>5</sup>          | 1.06×10 <sup>6</sup>          | 3.51×10 <sup>5</sup>          | 3.48×10 <sup>5</sup>          | 3.36×10 <sup>5</sup>           | 2.11×10 <sup>5</sup>           | 3.76×10 <sup>5</sup>           | 2.40×10 <sup>5</sup>           | 9.38×10 <sup>4</sup>           | 1.30×10 <sup>5</sup>          |
| 390                | 2-Propionylthiophene               | 6.30×10 <sup>6</sup>           | 1.78×10 <sup>7</sup>          | 5.80×10 <sup>6</sup>          | 8.31×10 <sup>6</sup>          | 6.22×10 <sup>6</sup>           | 7.18×10 <sup>6</sup>          | 7.17×10 <sup>6</sup>          | 1.08×10 <sup>7</sup>          | 1.51×10 <sup>7</sup>          | 1.85×10 <sup>7</sup>          | 3.55×10 <sup>6</sup>           | 4.28×10 <sup>6</sup>           | 5.07×10 <sup>6</sup>           | 1.01×10 <sup>7</sup>           | 8.79×10 <sup>6</sup>           | 1.39×10 <sup>6</sup>          |

The designations Dec, 1-6, and Sup refer to each blend type under study: Blend Dec – decaffeinated coffee blend, blends with labelled intensities (Blend 1 – intensity 5, Blend 2 – intensity 9, Blend 3 – intensity 10), selected origin blends (Blend 4 – Jamaica, Blend 5 – Tanzania, Blend 6 – Ethiopia), and Blend Sup – blend supplemented with natural extracts of ginseng and guarana. The GC × GC peak areas were given in arbitrary units. For the chemical families the RSD (relative standard deviation, %) is also shown. n.d. - not detected in the conditions used.
