# Supplementary material for: Insights on Single-Dose Espresso Coffee Capsules’ Volatile Profile: From Ground Powder Volatiles to Prediction of Espresso Brew Aroma Properties
Source: MDPI journal article supplement (doi:10.3390/foods10102508), 2021-10-19
Supplement: s1 [file s1]

## Supplementary Table S1 (Foods)

### Insights on single-dose espresso coffee capsules' volatile profile: from ground powder volatiles to prediction of espresso brew aroma properties

**Guido R. Lopes** <sup>1,†</sup>, **Sílvia Petronilho** <sup>1,2,\*,†</sup>, **Andreia S. Ferreira** <sup>1</sup>, **Mariana Pinto** <sup>1</sup>, **Claúdia P. Passos** <sup>1</sup>, **Elisabete Coelho** <sup>1</sup>, **Carla Rodrigues** <sup>3</sup>, **Cláudia Figueira** <sup>4</sup>, **Sílvia M. Rocha** <sup>1</sup> and **Manuel A. Coimbra** <sup>1</sup>

<sup>1</sup> LAQV-REQUIMTE, Chemistry Department, Campus Universitário de Santiago, University of Aveiro, 3810-193 Aveiro, Portugal; guido@ua.pt (G.R.L.); silviapetronilho@ua.pt (S.P.); a39493@ua.pt (A.S.F.); a39045@ua.pt (M.P.);

cpassos@ua.pt (C.P.P.); ecoelho@ua.pt (E.C.); smrocha@ua.pt (S.M.R.); mac@ua.pt (M.A.C.)

<sup>2</sup> Chemistry Research Centre-Vila Real, Department of Chemistry, University of Trás os-Montes and Alto Douro, Quinta de Prados, 5001-801 Vila Real, Portugal

<sup>3</sup> Delta Ventures, Av. Infante D. Henrique 151-A 1950-405 Lisboa, Portugal; carla.rodrigues@grupo-nabeiro.pt

<sup>4</sup> Diverge, Grupo Nabeiro Innovation Center, Alameda dos Oceanos 65, 1.1, 1990-208 Lisboa, Portugal; claudia.figueira@gruponabeiro.com

\* Correspondence: silviapetronilho@ua.pt

† G.R.L. and S.P. contributed equally as first authors.

**Table S1.** Chromatographic details and aroma descriptors of 390 volatile compounds putatively identified in 8 capsule-coffee powders and espresso brews using HS-SPME/GC × GC-ToFMS.

| Peak num          | <sup>1</sup> t <sub>R</sub> (s) <sup>a</sup> | <sup>2</sup> t <sub>R</sub> (s) <sup>a</sup> | Compound                  | CAS number | Formula                                       | RI <sub>Calc</sub> <sup>b</sup> | RI <sub>Lit</sub> <sup>c</sup> | RI Ref. | Previously reported <sup>d</sup> | Aroma descriptor <sup>e</sup>                                     | Aroma descriptor Ref.     |
|-------------------|----------------------------------------------|----------------------------------------------|---------------------------|------------|-----------------------------------------------|---------------------------------|--------------------------------|---------|----------------------------------|-------------------------------------------------------------------|---------------------------|
| <b>Acids</b>      |                                              |                                              |                           |            |                                               |                                 |                                |         |                                  |                                                                   |                           |
| <i>Aliphatics</i> |                                              |                                              |                           |            |                                               |                                 |                                |         |                                  |                                                                   |                           |
| 1                 | 144                                          | 5.370                                        | Acetic acid               | 64-19-7    | C <sub>2</sub> H <sub>4</sub> O <sub>2</sub>  | 672                             | 648                            | [1]     | [91]                             | Pungent, sour, acidic, vinegar                                    | [109, 114-116]            |
| 2                 | 180                                          | 1.660                                        | Propanoic acid            | 79-09-4    | C <sub>3</sub> H <sub>6</sub> O <sub>2</sub>  | 721                             | 699                            | [2]     | [91]                             | Pungent, rancid, sour milk, cheese, butter-like                   | [114, 116]                |
| 3                 | 270                                          | 2.980                                        | Butanoic acid             | 107-92-6   | C <sub>4</sub> H <sub>8</sub> O <sub>2</sub>  | 828                             | 815                            | [1]     | [91]                             | Sour, rancid, butter-like, sweaty, rubbish                        | [98, 114, 116, 117]       |
| 4                 | 342                                          | 2.030                                        | Isovaleric acid           | 503-74-2   | C <sub>5</sub> H <sub>10</sub> O <sub>2</sub> | 880                             | 880                            | [3]     | [91]                             | Acidic, cheesy, herbaceous, sweaty, rancid                        | [98, 114-116, 118]        |
| <b>Alcohols</b>   |                                              |                                              |                           |            |                                               |                                 |                                |         |                                  |                                                                   |                           |
| <i>Aliphatics</i> |                                              |                                              |                           |            |                                               |                                 |                                |         |                                  |                                                                   |                           |
| 5                 | 108                                          | 0.850                                        | 2-Methyl-1-propanol       | 78-83-1    | C <sub>4</sub> H <sub>10</sub> O              | 610                             | 612                            | [4]     | [91]                             | Wine-like                                                         | [116]                     |
| 6                 | 114                                          | 1.240                                        | 3-Buten-1-ol              | 627-27-0   | C <sub>4</sub> H <sub>8</sub> O               | 620                             | -                              | -       | -                                | -                                                                 | -                         |
| 7                 | 174                                          | 1.460                                        | 3-Methyl-3-buten-1-ol     | 763-32-6   | C <sub>5</sub> H <sub>10</sub> O              | 711                             | 708                            | [4]     | [91]                             | -                                                                 | -                         |
| 8                 | 180                                          | 1.180                                        | 2-Methyl-1-butanol        | 137-32-6   | C <sub>5</sub> H <sub>12</sub> O              | 720                             | 728                            | [1]     | [92]                             | Cooked, roasted with fruity or alcoholic undertones               | [116]                     |
| 9                 | 210                                          | 1.340                                        | 1-Pentanol                | 71-41-0    | C <sub>5</sub> H <sub>12</sub> O              | 766                             | 767                            | [3]     | [91]                             | Green, chemical, fusel oil-like sweet                             | [114, 116, 119]           |
| 10                | 222                                          | 1.800                                        | 3-Methyl-2-buten-1-ol     | 556-82-1   | C <sub>5</sub> H <sub>10</sub> O              | 785                             | 782                            | [2]     | [91]                             | Fresh, herbaceous-fruity-green, lavender-like, phenolic, metallic | [114, 116]                |
| 11                | 246                                          | 1.060                                        | 2-Hexanol                 | 626-93-7   | C <sub>6</sub> H <sub>14</sub> O              | 809                             | 813                            | [5]     | [91]                             | -                                                                 | -                         |
| 12                | 384                                          | 1.110                                        | 2-Heptanol                | 543-49-7   | C <sub>7</sub> H <sub>16</sub> O              | 908                             | 906                            | [2]     | [91]                             | Fresh, lemon-like, grassy-herbaceous, sweet-floral undertone      | [114, 116]                |
| 13                | 516                                          | 1.360                                        | 1-Octen-3-ol              | 3391-86-4  | C <sub>8</sub> H <sub>16</sub> O              | 984                             | 980                            | [4]     | [91]                             | Mushroom, herbaceous, savoury, brothy, meaty                      | [98, 119, 120]            |
| 14                | 600                                          | 1.280                                        | 2-Ethyl-1-hexanol         | 104-76-7   | C <sub>8</sub> H <sub>18</sub> O              | 1032                            | 1033                           | [2]     | [93]                             | Sweet, slightly floral rose-like                                  | [116]                     |
| 15                | 678                                          | 1.360                                        | 1-Octanol                 | 111-87-5   | C <sub>8</sub> H <sub>18</sub> O              | 1077                            | 1079                           | [4]     | [94]                             | Fresh, orange-rose, sweet                                         | [116]                     |
| <i>Aromatics</i>  |                                              |                                              |                           |            |                                               |                                 |                                |         |                                  |                                                                   |                           |
| 16                | 756                                          | 4.550                                        | 2-Phenylethanol           | 60-12-8    | C <sub>8</sub> H <sub>10</sub> O              | 1124                            | 1121                           | [2]     | [91]                             | Rose-honey-like, floral                                           | [114, 116, 119]           |
| <b>Aldehydes</b>  |                                              |                                              |                           |            |                                               |                                 |                                |         |                                  |                                                                   |                           |
| <i>Aliphatics</i> |                                              |                                              |                           |            |                                               |                                 |                                |         |                                  |                                                                   |                           |
| 17                | 66                                           | 0.350                                        | Acetaldehyde              | 75-07-0    | C <sub>2</sub> H <sub>4</sub> O               | 546                             | 548                            | [4]     | [91]                             | Pungent, ethereal, fruity, coffee, wine, acrid/egg,               | [114, 116, 119, 121, 122] |
| 18                | 90                                           | 0.430                                        | 2-Methylpropanal          | 78-84-2    | C <sub>4</sub> H <sub>8</sub> O               | 582                             | 582                            | [6]     | [91]                             | Pungent, sour, fruity, malty, buttery-oily                        | [114, 116, 123]           |
| 19                | 120                                          | 0.710                                        | 2-Butenal                 | 4170-30-3  | C <sub>4</sub> H <sub>6</sub> O               | 628                             | 633                            | [4]     | [95, 96]                         | -                                                                 | -                         |
| 20                | 126                                          | 0.460                                        | 3-Methylbutanal           | 590-86-3   | C <sub>5</sub> H <sub>10</sub> O              | 637                             | 633                            | [4]     | [91]                             | Pungent, acrid, fruity, apple-like, almond, malty, sweaty         | [114, 116, 118, 121, 123] |
| 21                | 180                                          | 0.770                                        | 2-Methyl-2-butenal        | 1115-11-3  | C <sub>5</sub> H <sub>8</sub> O               | 719                             | 715                            | [7]     | [91]                             | -                                                                 | -                         |
| 22                | 192                                          | 0.850                                        | 2-Pentenal                | 764-39-6   | C <sub>5</sub> H <sub>8</sub> O               | 738                             | 726                            | [8]     | -                                | Pungent, green, apple, orange, tomato                             | [116]                     |
| 23                | 240                                          | 0.660                                        | Hexanal                   | 66-25-1    | C <sub>6</sub> H <sub>12</sub> O              | 805                             | 801                            | [4]     | [91]                             | Fatty, green, grassy, fruity, rancid butter-like, nutty           | [114, 116, 117, 119, 123] |
| 24                | 258                                          | 0.800                                        | 4-Methyl-3-pentenal       | 5362-50-5  | C <sub>6</sub> H <sub>10</sub> O              | 818                             | -                              | -       | -                                | -                                                                 | -                         |
| 25                | 336                                          | 0.750                                        | 2-Methyl-2-hexenal        | 28467-88-1 | C <sub>7</sub> H <sub>12</sub> O              | 874                             | 884                            | [9]     | -                                | -                                                                 | -                         |
| 26                | 336                                          | 1.350                                        | 2,4-Hexadienal            | 80466-34-8 | C <sub>6</sub> H <sub>8</sub> O               | 875                             | 879                            | [10]    | [91]                             | Fresh, green, floral, citrus                                      | [116]                     |
| 27                | 342                                          | 0.690                                        | 4-Methylhexanal           | 41065-97-8 | C <sub>7</sub> H <sub>14</sub> O              | 879                             | 889                            | [9]     | -                                | -                                                                 | -                         |
| 28                | 378                                          | 0.710                                        | Heptanal                  | 111-71-7   | C <sub>7</sub> H <sub>14</sub> O              | 904                             | 906                            | [3]     | [91]                             | Oily-fatty, rancid, pungent, fermented-fruit-like                 | [114, 116]                |
| 29                | 474                                          | 0.960                                        | 2-Heptenal                | 2463-63-0  | C <sub>7</sub> H <sub>12</sub> O              | 959                             | 959                            | [4]     | [94]                             | Pungent, green, fatty                                             | [116]                     |
| 30                | 552                                          | 0.740                                        | Octanal                   | 124-13-0   | C <sub>8</sub> H <sub>16</sub> O              | 1004                            | 1001                           | [4]     | [91]                             | Fatty, citrus, orange-like, honey                                 | [116, 126]                |
| 31                | 594                                          | 1.310                                        | 2,4-Heptadienal           | 5910-85-0  | C <sub>7</sub> H <sub>10</sub> O              | 1028                            | 1043                           | [11]    | [97]                             | Fatty, green ((E,E)-isomer)                                       | [116]                     |
| 32                | 648                                          | 1.000                                        | 2-Octenal                 | 2363-89-5  | C <sub>8</sub> H <sub>14</sub> O              | 1059                            | 1059                           | [2]     | [98]                             | Green-leafy, orange, honey-like, cognac-like                      | [98, 116]                 |
| 33                | 726                                          | 0.770                                        | Nonanal                   | 124-19-6   | C <sub>9</sub> H <sub>18</sub> O              | 1104                            | 1106                           | [4]     | [94, 99]                         | Fatty, orange and rose note, soap-like, metallic                  | [116, 125]                |
| 34                | 822                                          | 0.950                                        | 2-Nonenal                 | 2463-53-8  | C <sub>9</sub> H <sub>16</sub> O              | 1161                            | 1162                           | [4]     | [91]                             | Fatty, orris-like, waxy, dried orange peels-like, cardboard-like  | [116, 117]                |
| 35                | 900                                          | 0.780                                        | Decanal                   | 112-31-2   | C <sub>10</sub> H <sub>20</sub> O             | 1208                            | 1207                           | [4]     | [97, 99, 100]                    | Sweet, waxy, floral, citrus, fatty                                | [116]                     |
| 36                | 1068                                         | 0.730                                        | Undecanal                 | 112-44-7   | C <sub>11</sub> H <sub>22</sub> O             | 1309                            | 1307                           | [4]     | [100]                            | Sweet, fatty, orange and rose undertone                           | [116]                     |
| 37                | 1224                                         | 0.780                                        | Dodecanal                 | 112-54-9   | C <sub>12</sub> H <sub>24</sub> O             | 1413                            | 1407                           | [4]     | [97, 100]                        | Fatty, violet-like                                                | [116]                     |
| <i>Aromatics</i>  |                                              |                                              |                           |            |                                               |                                 |                                |         |                                  |                                                                   |                           |
| 38                | 474                                          | 2.150                                        | Benzaldehyde              | 100-52-7   | C <sub>7</sub> H <sub>6</sub> O               | 960                             | 965                            | [4]     | [91]                             | Sweet, bitter almond-like, bitter                                 | [114, 116, 119]           |
| 39                | 618                                          | 2.380                                        | Benzeneacetaldehyde       | 122-78-1   | C <sub>8</sub> H <sub>8</sub> O               | 1043                            | 1046                           | [4]     | [91]                             | Pungent-green, hyacinth-like, floral, sweet-fruity, honey-like    | [114, 116, 118, 124, 125] |
| 40                | 618                                          | 2.750                                        | 2-Hydroxybenzaldehyde     | 90-02-8    | C <sub>7</sub> H <sub>6</sub> O <sub>2</sub>  | 1043                            | 1044                           | [2]     | [91]                             | Pungent, herbaceous, spicy-floral, bitter, almond-like            | [114, 116]                |
| 41                | 660                                          | 1.960                                        | 2-Methylbenzaldehyde      | 529-20-4   | C <sub>8</sub> H <sub>8</sub> O               | 1067                            | 1074                           | [4]     | [91]                             | Sweet, beany, fresh pea                                           | [98, 114]                 |
| 42                | 1008                                         | 2.260                                        | 2-Phenyl-2-butenal        | 4411-89-6  | C <sub>10</sub> H <sub>10</sub> O             | 1273                            | 1278                           | [2]     | [91]                             | Musty, floral, cocoa                                              | [128]                     |
| <b>Esters</b>     |                                              |                                              |                           |            |                                               |                                 |                                |         |                                  |                                                                   |                           |
| <i>Aliphatics</i> |                                              |                                              |                           |            |                                               |                                 |                                |         |                                  |                                                                   |                           |
| 43                | 84                                           | 0.420                                        | Methyl acetate            | 79-20-9    | C <sub>3</sub> H <sub>6</sub> O <sub>2</sub>  | 573                             | 566                            | [3]     | [91]                             | Sweet, ethereal, fruity                                           | [114, 116]                |
| 44                | 102                                          | 0.500                                        | Methyl propenoate         | 96-33-3    | C <sub>4</sub> H <sub>6</sub> O <sub>2</sub>  | 601                             | 607                            | [12]    | -                                | -                                                                 | -                         |
| 45                | 108                                          | 0.470                                        | Methyl propanoate         | 554-12-1   | C <sub>4</sub> H <sub>8</sub> O <sub>2</sub>  | 610                             | 615                            | [13]    | [91]                             | Ethereal-um-like, sweet, fruity                                   | [114, 116]                |
| 46                | 150                                          | 3.410                                        | Methyl glycolate          | 96-35-5    | C <sub>3</sub> H <sub>6</sub> O <sub>3</sub>  | 678                             | -                              | -       | [95]                             | -                                                                 | -                         |
| 47                | 156                                          | 0.570                                        | Methyl 2-methylpropenoate | 80-62-6    | C <sub>5</sub> H <sub>8</sub> O <sub>2</sub>  | 683                             | 685                            | [4]     | -                                | Acrid, fruity                                                     | [116]                     |
| 48                | 162                                          | 0.540                                        | Methyl butanoate          | 623-42-7   | C <sub>5</sub> H <sub>10</sub> O <sub>2</sub> | 692                             | 720                            | [13]    | [91]                             | Sweet-ethereal, fruity, apple peel, peach-like                    | [114, 116]                |

|                        |      |       |                                        |            |                                                |      |      |      |            |                                                                  |                      |
|------------------------|------|-------|----------------------------------------|------------|------------------------------------------------|------|------|------|------------|------------------------------------------------------------------|----------------------|
| 49                     | 198  | 0.770 | Methyl 2-butenote                      | 18707-60-3 | C <sub>5</sub> H <sub>8</sub> O <sub>2</sub>   | 747  | 755  | [14] | [96]       | -                                                                |                      |
| 50                     | 210  | 0.530 | Methyl 2-methylbutanoate               | 868-57-5   | C <sub>6</sub> H <sub>12</sub> O <sub>2</sub>  | 764  | 770  | [15] |            | Sweet, fruity, apple-like                                        | [116]                |
| 51                     | 216  | 0.570 | Methyl 3-methylbutanoate               | 556-24-1   | C <sub>6</sub> H <sub>12</sub> O <sub>2</sub>  | 774  | 775  | [12] | [91]       | Ethereal, fruity, apple-like, herbaceous                         | [114, 116]           |
| 52                     | 228  | 0.650 | 3-Methylbutyl formate                  | 110-45-2   | C <sub>6</sub> H <sub>12</sub> O <sub>2</sub>  | 792  | 791  | [2]  | [98]       | Plum, fruity, black currant-like                                 | [98, 116]            |
| 53                     | 258  | 0.620 | Butyl acetate                          | 123-86-4   | C <sub>6</sub> H <sub>12</sub> O <sub>2</sub>  | 818  | 818  | [4]  | [91]       | Pear-like, ethereal, fruity, ripe/over-ripe fruits-like          | [114, 116]           |
| 54                     | 270  | 0.610 | Methyl pentanoate                      | 624-24-8   | C <sub>6</sub> H <sub>12</sub> O <sub>2</sub>  | 827  | 829  | [5]  |            | Ethereal, green-fruity, apple-like, pineapple-like               | [114, 116]           |
| 55                     | 294  | 0.810 | Methyl 3-methyl-2-butenote             | 924-50-5   | C <sub>6</sub> H <sub>10</sub> O <sub>2</sub>  | 844  | 842  | [16] | [101]      | roasted                                                          | [129]                |
| 56                     | 312  | 0.570 | Ethyl 3-methylbutanoate                | 108-64-5   | C <sub>7</sub> H <sub>14</sub> O <sub>2</sub>  | 857  | 857  | [3]  | [91]       | Fruity, apple-like                                               | [116, 117, 119]      |
| 57                     | 348  | 0.630 | Isoamyl acetate                        | 123-92-2   | C <sub>7</sub> H <sub>14</sub> O <sub>2</sub>  | 883  | 882  | [3]  | [91]       | Fruity, banana, sweet, apple-like                                | [114, 116]           |
| 58                     | 354  | 0.620 | Methyl 3-methylpentanoate              | 2177-78-8  | C <sub>7</sub> H <sub>14</sub> O <sub>2</sub>  | 887  | -    | -    |            | -                                                                |                      |
| 59                     | 360  | 0.780 | 3-Methyl-3-butenyl acetate             | 5205-07-2  | C <sub>7</sub> H <sub>12</sub> O <sub>2</sub>  | 892  | 881  | [17] |            | Fruity                                                           | [116]                |
| 60                     | 366  | 0.630 | Methyl 4-methylpentanoate              | 2412-80-8  | C <sub>7</sub> H <sub>14</sub> O <sub>2</sub>  | 896  | 900  | [18] |            | Sweet, pineapple-like                                            | [116]                |
| 61                     | 402  | 0.660 | Pentyl acetate                         | 628-63-7   | C <sub>7</sub> H <sub>14</sub> O <sub>2</sub>  | 918  | 916  | [3]  |            | -                                                                |                      |
| 62                     | 420  | 0.660 | Methyl hexanoate                       | 106-70-7   | C <sub>7</sub> H <sub>14</sub> O <sub>2</sub>  | 928  | 927  | [3]  | [91]       | Pineapple-like, apricot-like, sweet, ethereal                    | [114, 116]           |
| 63                     | 420  | 0.750 | Ethyl tiglate                          | 5837-78-5  | C <sub>7</sub> H <sub>12</sub> O <sub>2</sub>  | 928  | 929  | [19] |            | Fruity, caramel                                                  | [114, 116]           |
| 64                     | 420  | 0.820 | 3-Methyl-2-butenyl acetate             | 1191-16-8  | C <sub>7</sub> H <sub>12</sub> O <sub>2</sub>  | 928  | 929  | [20] | [91]       | Fresh, fruity, banana-like, bergamot-like                        | [114]                |
| 65                     | 426  | 0.730 | Hexyl formate                          | 629-33-4   | C <sub>7</sub> H <sub>14</sub> O <sub>2</sub>  | 931  | 927  | [21] |            | Fruity, apple-like, unripe-plum                                  | [116]                |
| 66                     | 456  | 1.530 | Ethylidene acetate                     | 542-10-9   | C <sub>8</sub> H <sub>10</sub> O <sub>4</sub>  | 949  | -    | -    |            | -                                                                |                      |
| 67                     | 504  | 1.190 | Methyl 4-methyl-2-oxopentanoate        | 3682-43-7  | C <sub>7</sub> H <sub>12</sub> O <sub>3</sub>  | 977  | -    | -    |            | -                                                                |                      |
| 68                     | 516  | 0.640 | Butyl 2-methyl-2-propenoate            | 97-88-1    | C <sub>8</sub> H <sub>14</sub> O <sub>2</sub>  | 983  | 989  | [22] |            | -                                                                |                      |
| 69                     | 570  | 0.680 | Hexyl acetate                          | 142-92-7   | C <sub>8</sub> H <sub>16</sub> O <sub>2</sub>  | 1014 | 1006 | [3]  | [102]      | Fruity, apple, cherry, pear, floral                              | [116]                |
| 70                     | 684  | 0.710 | Isobutyl 3-methyl-2-butenote           | 30434-54-9 | C <sub>9</sub> H <sub>16</sub> O <sub>2</sub>  | 1080 | -    | -    |            | -                                                                |                      |
| 71                     | 768  | 0.720 | Methyl octanoate                       | 111-11-5   | C <sub>9</sub> H <sub>18</sub> O <sub>2</sub>  | 1129 | 1130 | [3]  |            | Winy, fruity, orange-like                                        | [116]                |
| 72                     | 864  | 0.720 | 3-Methylbutyl 3-methyl-2-butenote      | 56922-73-7 | C <sub>10</sub> H <sub>18</sub> O <sub>2</sub> | 1186 | 1184 | [23] |            | -                                                                |                      |
| 73                     | 1092 | 0.680 | Methyl decanoate                       | 110-42-9   | C <sub>11</sub> H <sub>22</sub> O <sub>2</sub> | 1325 | 1332 | [3]  |            | -                                                                |                      |
| 74                     | 1392 | 0.680 | Methyl dodecanoate                     | 111-82-0   | C <sub>13</sub> H <sub>26</sub> O <sub>2</sub> | 1531 | 1527 | [5]  |            | Fatty, floral, wine-like                                         | [116]                |
| <b>Aromatics</b>       |      |       |                                        |            |                                                |      |      |      |            |                                                                  |                      |
| 75                     | 654  | 1.990 | Phenyl acetate                         | 122-79-2   | C <sub>8</sub> H <sub>8</sub> O <sub>2</sub>   | 1063 | 1068 | [18] | [103, 104] | Floral, rosy, dark chocolate-like                                | [128]                |
| 76                     | 678  | 2.310 | Benzyl formate                         | 104-57-4   | C <sub>8</sub> H <sub>8</sub> O <sub>2</sub>   | 1077 | 1077 | [5]  | [91]       | Fruity, green, herbaceous, earthy, floral                        | [114, 116]           |
| 77                     | 708  | 1.710 | Methyl benzoate                        | 93-58-3    | C <sub>8</sub> H <sub>8</sub> O <sub>2</sub>   | 1094 | 1096 | [2]  | [91]       | Fruity, cananga-like                                             | [116]                |
| 78                     | 852  | 1.920 | Methyl phenylacetate                   | 101-41-7   | C <sub>9</sub> H <sub>10</sub> O <sub>2</sub>  | 1180 | 1179 | [5]  | [91]       | Honey, musky, jasmine, floral                                    | [114, 116]           |
| 79                     | 852  | 2.110 | 2-Phenylethyl formate                  | 104-62-1   | C <sub>9</sub> H <sub>10</sub> O <sub>2</sub>  | 1180 | 1176 | [5]  | [91]       | Green, herbaceous, rosy, hyacinth, chrysanthemum, watercress-    | [114, 116]           |
| 80                     | 882  | 1.880 | Methyl 2-hydroxybenzoate               | 119-36-8   | C <sub>8</sub> H <sub>6</sub> O <sub>3</sub>   | 1198 | 1207 | [3]  | [91]       | Sweet, rooty-fruity, minty, spicy, wintergreen-like              | [114, 116]           |
| 81                     | 990  | 1.540 | 2-Phenylethyl acetate                  | 103-45-7   | C <sub>10</sub> H <sub>12</sub> O <sub>2</sub> | 1262 | 1260 | [4]  | [105]      | Floral, rose, honey-like                                         | [116]                |
| 82                     | 1002 | 1.550 | Ethyl 2-hydroxybenzoate                | 118-61-6   | C <sub>9</sub> H <sub>10</sub> O <sub>3</sub>  | 1269 | 1280 | [24] | [96]       | Wintergreen                                                      | [116]                |
| <b>Furan compounds</b> |      |       |                                        |            |                                                |      |      |      |            |                                                                  |                      |
| 83                     | 78   | 0.380 | Furan                                  | 110-00-9   | C <sub>4</sub> H <sub>4</sub> O                | 564  | 567  | [25] | [91]       | Spicy-smokey, cinnamon-like                                      | [114]                |
| 84                     | 102  | 0.460 | 2-Methylfuran                          | 534-22-5   | C <sub>5</sub> H <sub>6</sub> O                | 601  | 601  | [26] | [91]       | Ethereal, sickly                                                 | [109]                |
| 85                     | 108  | 0.420 | Tetrahydrofuran                        | 109-99-9   | C <sub>4</sub> H <sub>8</sub> O                | 610  | 634  | [27] | [91]       | Sweet-gassy, bread-like                                          | [114]                |
| 86                     | 150  | 0.500 | 2,5-Dimethylfuran                      | 625-86-5   | C <sub>6</sub> H <sub>8</sub> O                | 703  | 704  | [28] | [91]       | coffee                                                           | [109]                |
| 87                     | 174  | 0.580 | 2,4-Dimethylfuran                      | 3710-43-8  | C <sub>6</sub> H <sub>8</sub> O                | 710  | 735  | [29] | [96]       | -                                                                |                      |
| 88                     | 228  | 0.570 | 2-Propylfuran                          | 4229-91-8  | C <sub>7</sub> H <sub>10</sub> O               | 792  | 788  | [12] | [91]       | -                                                                |                      |
| 89                     | 240  | 0.570 | 2-Ethyl-5-methylfuran                  | 1703-52-2  | C <sub>7</sub> H <sub>10</sub> O               | 805  | 799  | [28] | [91]       | -                                                                |                      |
| 90                     | 246  | 0.470 | 2-Ethyl-5-methyltetrahydrofuran        | 931-39-5   | C <sub>7</sub> H <sub>14</sub> O               | 809  | -    | -    |            | -                                                                |                      |
| 91                     | 246  | 2.470 | 2-Furancarboxitrile                    | 617-90-3   | C <sub>5</sub> H <sub>5</sub> NO               | 810  | 822  | [30] |            | -                                                                |                      |
| 92                     | 252  | 1.290 | Dihydro-2-methyl-3-furanone            | 3188-00-9  | C <sub>5</sub> H <sub>8</sub> O <sub>2</sub>   | 814  | 813  | [2]  | [91]       | Bread-like, buttery, nutty                                       | [109, 116]           |
| 93                     | 258  | 0.590 | 2,3,5-Trimethylfuran                   | 10504-04-8 | C <sub>7</sub> H <sub>10</sub> O               | 818  | 817  | [31] | [91]       | -                                                                |                      |
| 94                     | 264  | 2.840 | 3-Furaldehyde                          | 498-60-2   | C <sub>5</sub> H <sub>4</sub> O <sub>2</sub>   | 824  | 831  | [32] | [91]       | -                                                                |                      |
| 95                     | 276  | 0.760 | 2-Vinyl-5-methylfuran                  | 10504-13-9 | C <sub>7</sub> H <sub>8</sub> O                | 831  | 841  | [31] | [91]       | Coffee                                                           | [109]                |
| 96                     | 276  | 1.100 | 2-(Methoxymethyl)furan                 | 13679-46-4 | C <sub>6</sub> H <sub>8</sub> O <sub>2</sub>   | 831  | -    | -    | [91]       | Burnt, herbal, potato-like                                       | [98, 126]            |
| 97                     | 282  | 0.630 | 2,3,4-Trimethylfuran                   | 10599-57-2 | C <sub>7</sub> H <sub>10</sub> O               | 835  | -    | -    | [91]       | -                                                                |                      |
| 98                     | 282  | 3.300 | Furfural                               | 98-01-1    | C <sub>5</sub> H <sub>4</sub> O <sub>2</sub>   | 837  | 839  | [1]  | [91]       | Sweet, bread-like, caramellic, cinnamon-almond-like, bitter      | [109, 114]           |
| 99                     | 312  | 0.900 | 2-(2-Propenyl)furan                    | 75135-41-0 | C <sub>7</sub> H <sub>8</sub> O                | 857  | 856  | [28] | [91]       | -                                                                |                      |
| 100                    | 336  | 2.190 | 5-Methyl-2(3H)-furanone                | 591-12-8   | C <sub>5</sub> H <sub>6</sub> O <sub>2</sub>   | 876  | 874  | [33] | [98, 106]  | Sweet, herbaceous, tobacco-like, coffee, earthy, raw potato skin | [98, 109, 116]       |
| 101                    | 342  | 2.010 | 2-Furanmethanol                        | 98-00-0    | C <sub>5</sub> H <sub>6</sub> O <sub>2</sub>   | 880  | 867  | [3]  | [91]       | Slightly caramellic, warm, oily, burnt, bitter                   | [98, 114, 116, 119]  |
| 102                    | 360  | 0.470 | 2,5-Diethyltetrahydrofuran             | 41239-48-9 | C <sub>8</sub> H <sub>16</sub> O               | 892  | 896  | [16] |            | Sweet, herbaceous, caramellic                                    | [116]                |
| 103                    | 366  | 0.610 | 2-Butylfuran                           | 4466-24-4  | C <sub>8</sub> H <sub>12</sub> O               | 896  | 898  | [29] | [91]       | -                                                                |                      |
| 104                    | 390  | 2.700 | Furfuryl formate                       | 13493-97-5 | C <sub>6</sub> H <sub>6</sub> O <sub>3</sub>   | 912  | 902  | [34] | [91]       | Floral                                                           | [109]                |
| 105                    | 402  | 2.530 | 2-Acetylfuran                          | 1192-62-7  | C <sub>6</sub> H <sub>6</sub> O <sub>2</sub>   | 919  | 917  | [2]  | [91]       | Balsamic-sweet, tobacco-like, floral, balsamic-cinnamic, spicy,  | [109, 114, 116, 126] |
| 106                    | 414  | 4.220 | γ-Butyrolactone                        | 96-48-0    | C <sub>4</sub> H <sub>6</sub> O <sub>2</sub>   | 927  | 924  | [4]  | [91]       | Sweet, slightly buttery                                          | [109, 114, 116]      |
| 107                    | 432  | 0.660 | 2,3,4,5-Tetramethylfuran               | 10599-58-3 | C <sub>8</sub> H <sub>12</sub> O               | 935  | -    | -    | [91]       | -                                                                |                      |
| 108                    | 450  | 1.100 | 3-(1,1-Dimethylethyl)-2,3-dihydrofuran | 34314-82-4 | C <sub>8</sub> H <sub>14</sub> O               | 945  | -    | -    |            | -                                                                |                      |
| 109                    | 468  | 2.200 | 1-(2-Furyl)-2-propanone                | 6975-60-6  | C <sub>7</sub> H <sub>8</sub> O <sub>2</sub>   | 956  | 963  | [26] | [91]       | Sweet, fruity-caramellic, spicy, radish                          | [114, 116]           |

|     |      |       |                                     |            |                                                 |      |      |      |           |                                                                      |                      |
|-----|------|-------|-------------------------------------|------------|-------------------------------------------------|------|------|------|-----------|----------------------------------------------------------------------|----------------------|
| 110 | 474  | 0.840 | 2-Methyl-5-propenylfuran            | 5555-95-3  | C <sub>8</sub> H <sub>10</sub> O                | 959  | 972  | [31] | [91]      | Candy, fruity, sweet                                                 | [98]                 |
| 111 | 480  | 3.090 | Dihydro-5-methyl-2(3H)-furanone     | 108-29-2   | C <sub>5</sub> H <sub>8</sub> O <sub>2</sub>    | 964  | 965  | [30] | [91]      | Sweet, hay-like, tobacco-like, herbaceous                            | [114, 116]           |
| 112 | 486  | 2.700 | 5-Methylfurfural                    | 620-02-0   | C <sub>6</sub> H <sub>6</sub> O <sub>2</sub>    | 967  | 965  | [3]  | [91]      | Sweet, spicy, caramel                                                | [109, 114, 116, 119] |
| 113 | 504  | 1.610 | 2-Acetyl-5-methylfuran              | 1193-79-9  | C <sub>7</sub> H <sub>8</sub> O <sub>2</sub>    | 977  | 977  | [35] | [91]      | Nutty                                                                | [116]                |
| 114 | 510  | 2.510 | Methyl 2-furoate                    | 611-13-2   | C <sub>6</sub> H <sub>6</sub> O <sub>3</sub>    | 981  | 983  | [36] | [91]      | Berry-like, fruity, winey, mushrooms-like, fungus-like, tobacco-like | [114, 116]           |
| 115 | 534  | 0.660 | 2-Pentylfuran                       | 3777-69-3  | C <sub>9</sub> H <sub>14</sub> O                | 993  | 992  | [36] | [91]      | Fruity, green bean, metallic, vegetable                              | [116]                |
| 116 | 534  | 1.670 | Benzofuran                          | 271-89-6   | C <sub>8</sub> H <sub>6</sub> O                 | 994  | 996  | [3]  | [91]      | -                                                                    |                      |
| 117 | 540  | 1.940 | Furfuryl acetate                    | 623-17-6   | C <sub>7</sub> H <sub>8</sub> O <sub>3</sub>    | 998  | 998  | [37] | [91]      | Ethereal-floral, herbal-spicy, fruity, banana, nutty                 | [109, 114, 116]      |
| 118 | 552  | 2.930 | 2,5-Dihydro-3,5-dimethyl-2-furanone | 5584-69-0  | C <sub>6</sub> H <sub>8</sub> O <sub>2</sub>    | 1005 | 993  | [38] | [99, 107] | -                                                                    |                      |
| 119 | 564  | 2.070 | 1-(2-Furanyl)-1-propanone           | 3194-15-8  | C <sub>7</sub> H <sub>8</sub> O <sub>2</sub>    | 1012 | 1014 | [27] | [91]      | -                                                                    |                      |
| 120 | 612  | 2.030 | 2,2'-Bifuran                        | 5905-00-0  | C <sub>8</sub> H <sub>6</sub> O <sub>2</sub>    | 1039 | 1044 | [28] | [91]      | -                                                                    |                      |
| 121 | 624  | 1.670 | 3,4-Dimethyl-2,5-furandione         | 766-39-2   | C <sub>6</sub> H <sub>6</sub> O <sub>3</sub>    | 1046 | 1046 | [27] | [91]      | -                                                                    |                      |
| 122 | 630  | 1.720 | 1-(5-Methyl-2-furyl)-2-propanone    | 13678-74-5 | C <sub>8</sub> H <sub>10</sub> O <sub>2</sub>   | 1049 | 1047 | [39] | [91]      | -                                                                    |                      |
| 123 | 642  | 1.810 | 1-(2-Furanyl)-2-butanone            | 4208-63-3  | C <sub>8</sub> H <sub>10</sub> O <sub>2</sub>   | 1056 | 1063 | [26] | [91]      | -                                                                    |                      |
| 124 | 648  | 2.100 | 5-Ethyl-2-furaldehyde               | 23074-10-4 | C <sub>7</sub> H <sub>8</sub> O <sub>2</sub>    | 1060 | 1058 | [27] | [91]      | -                                                                    |                      |
| 125 | 678  | 2.050 | 1-(2-Furanyl)-3-butanone            | 699-17-2   | C <sub>8</sub> H <sub>10</sub> O <sub>2</sub>   | 1077 | 1077 | [33] | [91]      | -                                                                    |                      |
| 126 | 690  | 1.720 | 2,2'-Methylenebisfuran              | 1197-40-6  | C <sub>9</sub> H <sub>8</sub> O <sub>2</sub>    | 1084 | 1084 | [33] | [91]      | -                                                                    |                      |
| 127 | 696  | 1.480 | 3-Acetyl-2,5-dimethylfuran          | 10599-70-9 | C <sub>8</sub> H <sub>10</sub> O <sub>2</sub>   | 1087 | 1089 | [27] |           | -                                                                    |                      |
| 128 | 702  | 1.580 | Furfuryl propanoate                 | 623-19-8   | C <sub>8</sub> H <sub>10</sub> O <sub>3</sub>   | 1091 | 1096 | [28] | [91]      | Spicy, floral, fruity                                                | [116, 130]           |
| 129 | 720  | 1.810 | 1-(2-Furanyl)-1-butanone            | 4208-57-5  | C <sub>8</sub> H <sub>10</sub> O <sub>2</sub>   | 1101 | -    | -    | [91]      | -                                                                    |                      |
| 130 | 732  | 1.410 | 2-Methylbenzofuran                  | 4265-25-2  | C <sub>9</sub> H <sub>8</sub> O                 | 1108 | 1108 | [27] | [91]      | -                                                                    |                      |
| 131 | 774  | 1.730 | 2-Methyl-5-propionylfuran           | 10599-69-6 | C <sub>8</sub> H <sub>10</sub> O <sub>2</sub>   | 1133 | 1136 | [27] | [91]      | -                                                                    |                      |
| 132 | 798  | 1.450 | 1-(5-Methyl-2-furanyl)-2-butanone   | 13678-70-1 | C <sub>9</sub> H <sub>12</sub> O <sub>2</sub>   | 1147 | -    | -    | [91]      | -                                                                    |                      |
| 133 | 834  | 2.220 | 2-Heptylfuran                       | 3777-71-7  | C <sub>11</sub> H <sub>18</sub> O               | 1169 | 1154 | [3]  | [91]      | Roasted, nutty                                                       | [116]                |
| 134 | 846  | 1.410 | Furfuryl butanoate                  | 623-21-2   | C <sub>9</sub> H <sub>12</sub> O <sub>3</sub>   | 1173 | 1171 | [40] | [91]      | -                                                                    |                      |
| 135 | 858  | 1.430 | 2-(2-Furanylmethyl)-5-methylfuran   | 13678-51-8 | C <sub>10</sub> H <sub>10</sub> O <sub>2</sub>  | 1183 | 1179 | [33] | [91]      | -                                                                    |                      |
| 136 | 864  | 2.410 | <i>n</i> -Furfuryl pyrrole          | 1438-94-4  | C <sub>8</sub> H <sub>9</sub> NO                | 1187 | 1189 | [28] | [91]      | Vegetable, green, earthy, horseradish, mushroom-like                 | [116, 130]           |
| 137 | 876  | 2.640 | 2-Methyl-3(2-furyl)acrolein         | 874-66-8   | C <sub>8</sub> H <sub>8</sub> O <sub>2</sub>    | 1194 | 1196 | [25] |           | -                                                                    |                      |
| 138 | 876  | 2.970 | 4-(2-Furanyl)-3-buten-2-one         | 623-15-4   | C <sub>8</sub> H <sub>8</sub> O <sub>2</sub>    | 1195 | 1191 | [25] | [91]      | Spicy-woody, sweet, cinnamon-like, balsamic, vanilla, woody          | [109, 116]           |
| 139 | 906  | 1.340 | 4,7-Dimethylbenzofuran              | 28715-26-6 | C <sub>10</sub> H <sub>10</sub> O               | 1212 | 1218 | [25] |           | -                                                                    |                      |
| 140 | 990  | 2.780 | 2-Furyl pyrazine                    | 32736-95-1 | C <sub>8</sub> H <sub>6</sub> N <sub>2</sub> O  | 1262 | -    | -    | [91]      | -                                                                    |                      |
| 141 | 1020 | 1.220 | 2,2'-Methylenebis(5-methylfuran)    | 13679-43-1 | C <sub>11</sub> H <sub>12</sub> O <sub>2</sub>  | 1279 | 1277 | [33] | [91]      | -                                                                    |                      |
| 142 | 1020 | 1.870 | 1-(5-Methylfurfuryl)pyrrole         | 13678-52-9 | C <sub>10</sub> H <sub>11</sub> NO              | 1280 | -    | -    | [91]      | Mushroom-like, green, pharmaceutical, roasty                         | [126, 130]           |
| 143 | 1056 | 2.410 | Difurfuryl ether                    | 4437-22-3  | C <sub>10</sub> H <sub>10</sub> O <sub>3</sub>  | 1302 | 1305 | [28] | [91]      | -                                                                    |                      |
| 144 | 1152 | 1.700 | 1-Furfuryl-2-formylpyrrole          | 13788-32-4 | C <sub>10</sub> H <sub>9</sub> NO <sub>2</sub>  | 1365 | -    | -    | [91]      | green, minty                                                         | [109]                |
| 145 | 1326 | 2.540 | 2-Acetyl-1-furfurylpyrrole          | 13678-73-4 | C <sub>11</sub> H <sub>11</sub> NO <sub>2</sub> | 1485 | -    | -    | [91]      | -                                                                    |                      |

## Hydrocarbons

|                   |      |       |               |           |                                 |      |      |      |      |   |  |
|-------------------|------|-------|---------------|-----------|---------------------------------|------|------|------|------|---|--|
| <i>Aliphatics</i> |      |       |               |           |                                 |      |      |      |      |   |  |
| 146               | 378  | 0.380 | Nonane        | 111-84-2  | C <sub>9</sub> H <sub>20</sub>  | 904  | 900  | [4]  | [91] | - |  |
| 147               | 420  | 0.500 | 1,3-Nonadiene | -         | C <sub>9</sub> H <sub>16</sub>  | 928  | 930  | [41] |      | - |  |
| 148               | 546  | 0.400 | Decane        | 124-18-5  | C <sub>10</sub> H <sub>22</sub> | 1000 | 1000 | [4]  | [91] | - |  |
| 149               | 720  | 0.410 | Undecane      | 1120-21-4 | C <sub>11</sub> H <sub>24</sub> | 1100 | 1101 | [2]  | [91] | - |  |
| 150               | 882  | 0.750 | 1-Dodecene    | 112-41-4  | C <sub>12</sub> H <sub>24</sub> | 1197 | 1192 | [42] |      | - |  |
| 151               | 894  | 0.430 | Dodecane      | 112-40-3  | C <sub>12</sub> H <sub>26</sub> | 1204 | 1201 | [4]  | [91] | - |  |
| 152               | 1056 | 0.460 | Tridecane     | 629-50-5  | C <sub>13</sub> H <sub>28</sub> | 1300 | 1301 | [4]  | [91] | - |  |
| 153               | 1212 | 0.470 | Tetradecane   | 629-59-4  | C <sub>14</sub> H <sub>30</sub> | 1405 | 1401 | [4]  | [91] | - |  |
| 154               | 1356 | 0.450 | Pentadecane   | 629-62-9  | C <sub>15</sub> H <sub>32</sub> | 1505 | 1501 | [4]  | [91] | - |  |
| 155               | 1494 | 0.470 | Hexadecane    | 544-76-3  | C <sub>16</sub> H <sub>34</sub> | 1605 | 1601 | [4]  | [91] | - |  |

## Aromatics

|     |     |       |                             |           |                                 |      |      |      |       |                               |            |
|-----|-----|-------|-----------------------------|-----------|---------------------------------|------|------|------|-------|-------------------------------|------------|
| 156 | 204 | 0.600 | Methylbenzene               | 108-88-3  | C <sub>7</sub> H <sub>8</sub>   | 755  | 759  | [4]  | [91]  | Sweet-gassy                   | [114]      |
| 157 | 318 | 0.680 | Ethylbenzene                | 100-41-4  | C <sub>8</sub> H <sub>10</sub>  | 861  | 860  | [4]  | [91]  | Sweet-gassy                   | [114]      |
| 158 | 330 | 0.690 | 1,3-Dimethylbenzene         | 108-38-3  | C <sub>8</sub> H <sub>10</sub>  | 870  | 871  | [4]  | [91]  | -                             |            |
| 159 | 360 | 0.950 | Phenylethylene              | 100-42-5  | C <sub>8</sub> H <sub>8</sub>   | 892  | 895  | [2]  | [91]  | Sweet-gassy, balsamic, floral | [114, 116] |
| 160 | 414 | 0.640 | 1-Methylethylbenzene        | 98-82-8   | C <sub>9</sub> H <sub>12</sub>  | 925  | 927  | [4]  |       | -                             |            |
| 161 | 474 | 0.690 | 1-Ethyl-4-methylbenzene     | 622-96-8  | C <sub>9</sub> H <sub>12</sub>  | 959  | 964  | [4]  | [91]  | -                             |            |
| 162 | 582 | 0.820 | 1,2,3-Trimethylbenzene      | 526-73-8  | C <sub>9</sub> H <sub>12</sub>  | 1021 | 1021 | [2]  |       | -                             |            |
| 163 | 630 | 0.700 | 1-Methyl-3-propylbenzene    | 1074-43-7 | C <sub>10</sub> H <sub>14</sub> | 1049 | 1056 | [4]  |       | -                             |            |
| 164 | 642 | 0.690 | Butylbenzene                | 104-51-8  | C <sub>10</sub> H <sub>14</sub> | 1056 | 1054 | [21] |       | -                             |            |
| 165 | 678 | 0.740 | 4-Ethyl-1,2-dimethylbenzene | 934-80-5  | C <sub>10</sub> H <sub>14</sub> | 1076 | 1082 | [43] |       | -                             |            |
| 166 | 690 | 0.780 | 1-Ethyl-2,3-dimethylbenzene | 933-98-2  | C <sub>10</sub> H <sub>14</sub> | 1083 | 1085 | [2]  |       | -                             |            |
| 167 | 750 | 0.820 | 1,2,4,5-Tetramethylbenzene  | 95-93-2   | C <sub>10</sub> H <sub>14</sub> | 1118 | 1123 | [4]  | [91]  | -                             |            |
| 168 | 804 | 0.870 | 1,2,3,4-Tetramethylbenzene  | 488-23-3  | C <sub>10</sub> H <sub>14</sub> | 1151 | 1150 | [44] | [108] | -                             |            |
| 169 | 816 | 0.690 | Pentylbenzene               | 538-68-1  | C <sub>11</sub> H <sub>16</sub> | 1158 | 1154 | [21] |       | -                             |            |

|                   |      |       |                                          |            |                                               |      |      |      |            |                                                                                   |
|-------------------|------|-------|------------------------------------------|------------|-----------------------------------------------|------|------|------|------------|-----------------------------------------------------------------------------------|
| 170               | 1542 | 0.600 | 1-Butylheptylbenzene                     | 4537-15-9  | C <sub>17</sub> H <sub>28</sub>               | 1641 | 1633 | [11] | -          |                                                                                   |
| <b>Ketones</b>    |      |       |                                          |            |                                               |      |      |      |            |                                                                                   |
| <i>Aliphatics</i> |      |       |                                          |            |                                               |      |      |      |            |                                                                                   |
| 171               | 78   | 0.410 | 2-Propanone                              | 67-64-1    | C <sub>3</sub> H <sub>6</sub> O               | 564  | 559  | [4]  | [91]       | Ethereal, lemon [114, 119]                                                        |
| 172               | 96   | 0.500 | 2-Butanone                               | 78-93-3    | C <sub>4</sub> H <sub>8</sub> O               | 592  | 590  | [4]  | [91]       | Ethereal, sweet apricot-like [114, 116]                                           |
| 173               | 96   | 0.600 | 2,3-Butanedione (Diacetyl)               | 431-03-8   | C <sub>4</sub> H <sub>6</sub> O <sub>2</sub>  | 592  | 591  | [4]  | [91]       | Buttery [114-116, 121, 123]                                                       |
| 174               | 138  | 0.560 | 2-Pentanone                              | 107-87-9   | C <sub>5</sub> H <sub>10</sub> O              | 655  | 664  | [4]  | [91]       | Ethereal-fruity, wine [114, 116]                                                  |
| 175               | 144  | 0.710 | 2,3-Pentanedione                         | 600-14-6   | C <sub>5</sub> H <sub>8</sub> O <sub>2</sub>  | 665  | 665  | [4]  | [91]       | Buttery, oily, sweet, caramel-like, milky [98, 109, 114-116, 121, 126]            |
| 176               | 168  | 1.910 | 1-Hydroxy-2-propanone                    | 116-09-6   | C <sub>3</sub> H <sub>6</sub> O <sub>2</sub>  | 703  | 698  | [45] | [91]       | Sweet-caramellic, mushroom, earthy, nutty [98, 109, 114]                          |
| 177               | 180  | 0.560 | 4-Methyl-2-pentanone                     | 108-10-1   | C <sub>6</sub> H <sub>12</sub> O              | 719  | 721  | [2]  | [91]       | Ethereal-fruity, spicy [114, 116]                                                 |
| 178               | 180  | 0.860 | 3-Penten-2-one                           | 625-33-2   | C <sub>5</sub> H <sub>8</sub> O               | 719  | 717  | [4]  | [91]       | Fruity [116]                                                                      |
| 179               | 192  | 1.660 | 3-Hydroxy-2-butanone (Acetoin)           | 513-86-0   | C <sub>4</sub> H <sub>8</sub> O <sub>2</sub>  | 739  | 733  | [46] | [91]       | Creamy-fatty-buttery, woody, yogurt [109, 114, 116, 119]                          |
| 180               | 204  | 0.640 | 2-Methyl-1-penten-3-one                  | 25044-01-3 | C <sub>6</sub> H <sub>10</sub> O              | 756  | 748  | [47] |            | -                                                                                 |
| 181               | 216  | 0.910 | 2,4-Pentanedione                         | 123-54-6   | C <sub>5</sub> H <sub>8</sub> O <sub>2</sub>  | 774  | 783  | [36] | [91]       | Ethereal-minty, metallic [114]                                                    |
| 182               | 222  | 0.620 | 3-Hexanone                               | 589-38-8   | C <sub>6</sub> H <sub>12</sub> O              | 783  | 785  | [18] | [91]       | Ethereal, grape, wine-like [98]                                                   |
| 183               | 222  | 0.770 | 2,4-Dimethyl-3-pentanone                 | 565-80-0   | C <sub>7</sub> H <sub>14</sub> O              | 783  | 793  | [48] | [91]       | -                                                                                 |
| 184               | 228  | 0.670 | 2-Hexanone                               | 591-78-6   | C <sub>6</sub> H <sub>12</sub> O              | 792  | 791  | [2]  | [91]       | -                                                                                 |
| 185               | 240  | 0.790 | 3,4-Hexanedione                          | 4437-51-8  | C <sub>6</sub> H <sub>10</sub> O <sub>2</sub> | 805  | 804  | [28] | [91]       | Buttery, toasty, burnt, nutty, caramel-eggy [114, 116]                            |
| 186               | 240  | 2.220 | 1-Hydroxy-2-butanone                     | 5077-67-8  | C <sub>4</sub> H <sub>8</sub> O <sub>2</sub>  | 806  | -    | -    | [91]       | Toasted [109]                                                                     |
| 187               | 258  | 1.750 | 3-Hydroxy-2-pentanone                    | 3142-66-3  | C <sub>5</sub> H <sub>10</sub> O <sub>2</sub> | 819  | 807  | [2]  | [91]       | Earthy, aged [98]                                                                 |
| 188               | 264  | 1.870 | 2-Hydroxy-3-pentanone                    | 5704-20-1  | C <sub>5</sub> H <sub>10</sub> O <sub>2</sub> | 823  | 821  | [49] | [91]       | -                                                                                 |
| 189               | 294  | 0.930 | 3-Hexen-2-one                            | 763-93-9   | C <sub>6</sub> H <sub>10</sub> O              | 844  | 845  | [50] |            | -                                                                                 |
| 190               | 294  | 1.010 | 3-Hexene-2,5-dione                       | 4436-75-3  | C <sub>6</sub> H <sub>8</sub> O <sub>2</sub>  | 844  | -    | -    |            | -                                                                                 |
| 191               | 300  | 0.650 | 4-Methyl-2-hexanone                      | 105-42-0   | C <sub>7</sub> H <sub>14</sub> O              | 848  | 848  | [2]  |            | -                                                                                 |
| 192               | 336  | 0.660 | 4-Heptanone                              | 123-19-3   | C <sub>7</sub> H <sub>14</sub> O              | 874  | 871  | [4]  | [91]       | Ethereal-fruity, pineapple-like, strawberry-like [114]                            |
| 193               | 354  | 2.540 | 1-(Acetyloxy)-2-propanone                | 592-20-1   | C <sub>5</sub> H <sub>8</sub> O <sub>3</sub>  | 889  | 882  | [28] | [91]       | Fruity-buttery, sour [114]                                                        |
| 194               | 360  | 0.660 | 3-Heptanone                              | 106-35-4   | C <sub>7</sub> H <sub>14</sub> O              | 892  | 889  | [4]  | [91]       | Green, fatty, fruity, sweet, ethereal [114, 116]                                  |
| 195               | 366  | 0.720 | 2-Heptanone                              | 110-43-0   | C <sub>7</sub> H <sub>14</sub> O              | 896  | 895  | [2]  | [91]       | Fruity, spicy, cinnamon, banana, spicy [116]                                      |
| 196               | 444  | 0.940 | 3-Hepten-2-one                           | 1119-44-4  | C <sub>7</sub> H <sub>12</sub> O              | 942  | 942  | [51] | [98]       | Green-grassy [116]                                                                |
| 197               | 444  | 2.180 | 2,5-Hexanedione                          | 110-13-4   | C <sub>6</sub> H <sub>10</sub> O <sub>2</sub> | 943  | 949  | [25] | [91]       | Sweet-ethereal [114]                                                              |
| 198               | 468  | 0.660 | 6-Methyl-3-heptanone                     | 624-42-0   | C <sub>8</sub> H <sub>16</sub> O              | 956  | 941  | [52] |            | -                                                                                 |
| 199               | 468  | 0.720 | 6-Methyl-2-heptanone                     | 928-68-7   | C <sub>8</sub> H <sub>16</sub> O              | 956  | 955  | [53] |            | -                                                                                 |
| 200               | 486  | 0.740 | 5-Methyl-2-heptanone                     | 18217-12-4 | C <sub>8</sub> H <sub>16</sub> O              | 966  | 971  | [54] |            | -                                                                                 |
| 201               | 510  | 0.820 | 1-Octen-3-one                            | 4312-99-6  | C <sub>8</sub> H <sub>14</sub> O              | 980  | 980  | [4]  | [91]       | Mushroom [116, 117, 122, 127]                                                     |
| 202               | 522  | 0.850 | 2,3-Octanedione                          | 585-25-1   | C <sub>8</sub> H <sub>14</sub> O <sub>2</sub> | 987  | 985  | [4]  | [91]       | Warmed-over [116]                                                                 |
| 203               | 522  | 0.900 | 6-Methyl-5-hepten-2-one                  | 110-93-0   | C <sub>8</sub> H <sub>14</sub> O              | 987  | 985  | [4]  | [91]       | Strong, fatty, green, citrus-like [116]                                           |
| 204               | 534  | 0.740 | 2-Octanone                               | 111-13-7   | C <sub>8</sub> H <sub>16</sub> O              | 994  | 990  | [4]  | [91]       | Floral, bitter-green, musty-herbaceous, unripe-apple fruity [114, 116]            |
| 205               | 618  | 0.990 | 3-Octen-2-one                            | 1669-44-9  | C <sub>8</sub> H <sub>14</sub> O              | 1042 | 1040 | [4]  | [91]       | Fruity, lemon [116]                                                               |
| 206               | 708  | 0.780 | 2-Nonanone                               | 821-55-6   | C <sub>9</sub> H <sub>18</sub> O              | 1093 | 1095 | [4]  | [91]       | Fruity-floral, fatty, herbaceous, rue [116, 130]                                  |
| 207               | 792  | 0.930 | 3-Nonen-2-one                            | 14309-57-0 | C <sub>9</sub> H <sub>16</sub> O              | 1143 | 1144 | [55] |            | Fruity [116]                                                                      |
| <i>Cyclics</i>    |      |       |                                          |            |                                               |      |      |      |            |                                                                                   |
| 208               | 294  | 1.780 | 2-Cyclopenten-1-one                      | 930-30-3   | C <sub>5</sub> H <sub>6</sub> O               | 845  | 835  | [32] | [91]       | -                                                                                 |
| 209               | 366  | 1.070 | Cyclohexanone                            | 108-94-1   | C <sub>6</sub> H <sub>10</sub> O              | 896  | 895  | [4]  |            | Peppermint, acetone-like [116]                                                    |
| 210               | 366  | 4.250 | 4-Cyclopentene-1,3-dione                 | 930-60-9   | C <sub>5</sub> H <sub>4</sub> O <sub>2</sub>  | 899  | 911  | [31] | [109, 110] | -                                                                                 |
| 211               | 390  | 1.390 | 2-Methyl-2-cyclopenten-1-one             | 1120-73-6  | C <sub>6</sub> H <sub>8</sub> O               | 911  | 920  | [31] | [91]       | -                                                                                 |
| 212               | 432  | 1.640 | 2-Cyclohexen-1-one                       | 930-68-7   | C <sub>6</sub> H <sub>8</sub> O               | 935  | 927  | [56] | [91]       | Gassy-mint [114]                                                                  |
| 213               | 486  | 1.380 | 5-Ethylcyclopent-2-en-1-one              | 34094-63-8 | C <sub>7</sub> H <sub>10</sub> O              | 966  | 966  | [57] |            | -                                                                                 |
| 214               | 510  | 1.300 | 6-Methylenebicyclo[3.2.0]hept-3-en-2-one | -          | C <sub>8</sub> H <sub>8</sub> O               | 980  | -    | -    |            | -                                                                                 |
| 215               | 534  | 1.270 | 3-Methyl-2-cyclohexen-1-one              | 1193-18-6  | C <sub>7</sub> H <sub>10</sub> O              | 994  | -    | -    | [91]       | Caramel-like, phenolic, mild cherry [116, 130]                                    |
| 216               | 600  | 0.750 | 2,2,6-Trimethylcyclohexanone             | 2408-37-9  | C <sub>9</sub> H <sub>16</sub> O              | 1032 | 1036 | [5]  |            | -                                                                                 |
| 217               | 600  | 3.800 | 2-Cyclohexene-1,4-dione                  | 4505-38-8  | C <sub>6</sub> H <sub>6</sub> O <sub>2</sub>  | 1033 | 1036 | [25] |            | -                                                                                 |
| 218               | 612  | 1.040 | 3,5-Dimethyl-2-cyclohexen-1-one          | 1123-09-7  | C <sub>8</sub> H <sub>12</sub> O              | 1039 | -    | -    |            | -                                                                                 |
| 219               | 612  | 5.470 | 2-Hydroxy-3-methyl-2-cyclopenten-1-one   | 80-71-7    | C <sub>6</sub> H <sub>8</sub> O <sub>2</sub>  | 1041 | 1042 | [58] | [91]       | Sweet, caramellic-spicy, walnut, maple, licorice, celery, tobacco [114, 115, 124] |
| 220               | 654  | 1.200 | 2,3,4-Trimethyl-2-cyclopenten-1-one      | 28790-86-5 | C <sub>8</sub> H <sub>12</sub> O              | 1063 | 1071 | [28] | [28]       | -                                                                                 |
| 221               | 654  | 3.990 | 3,5-Dimethyl-1,2-cyclopentanedione       | 13494-07-0 | C <sub>7</sub> H <sub>10</sub> O <sub>2</sub> | 1064 | -    | -    | [91]       | -                                                                                 |
| 222               | 708  | 2.120 | 3-Ethyl-2-hydroxy-2-cyclopenten-1-one    | 21835-01-8 | C <sub>7</sub> H <sub>10</sub> O <sub>2</sub> | 1094 | 1091 | [59] | [91]       | Caramel-like, sweet, sugary [116, 130]                                            |
| <i>Aromatics</i>  |      |       |                                          |            |                                               |      |      |      |            |                                                                                   |
| 223               | 660  | 2.190 | Acetophenone                             | 98-86-2    | C <sub>8</sub> H <sub>8</sub> O               | 1067 | 1065 | [2]  | [91]       | Sweet [116]                                                                       |
| 224               | 768  | 2.140 | 1-Phenyl-2-propanone                     | 103-79-7   | C <sub>9</sub> H <sub>10</sub> O              | 1130 | 1131 | [2]  |            | -                                                                                 |
| 225               | 822  | 2.320 | <i>o</i> -Hydroxyacetophenone            | 118-93-4   | C <sub>8</sub> H <sub>8</sub> O <sub>2</sub>  | 1162 | 1167 | [60] | [91]       | Sweet, heavy-floral, herbaceous, new-mown hay-like, mimosa -like [114]            |
| 226               | 834  | 2.340 | 1-Phenyl-1,2-propanedione                | 579-07-7   | C <sub>9</sub> H <sub>8</sub> O <sub>2</sub>  | 1169 | 1175 | [61] | [91]       | Warm-floral, herbaceous, plastic [114, 116]                                       |
| 227               | 864  | 1.950 | <i>p</i> -Methylacetophenone             | 122-00-9   | C <sub>9</sub> H <sub>10</sub> O              | 1187 | 1190 | [2]  |            | Fruity, floral [116]                                                              |
| 228               | 936  | 1.710 | 1-Phenyl-2-butanone                      | 1007-32-5  | C <sub>10</sub> H <sub>12</sub> O             | 1230 | 1231 | [2]  |            | -                                                                                 |

|                         |      |       |                                                |             |                                                 |      |      |      |       |                                                                       |
|-------------------------|------|-------|------------------------------------------------|-------------|-------------------------------------------------|------|------|------|-------|-----------------------------------------------------------------------|
| 229                     | 990  | 1.860 | 1-(4-Hydroxyphenyl)-1-propanone                | 70-70-2     | C <sub>9</sub> H <sub>10</sub> O <sub>2</sub>   | 1262 | -    | -    | -     | -                                                                     |
| 230                     | 1068 | 2.470 | 4-Hydroxy-3-methylacetophenone                 | 876-02-8    | C <sub>9</sub> H <sub>10</sub> O <sub>2</sub>   | 1310 | 1311 | [33] | [111] | -                                                                     |
| <b>Volatile phenols</b> |      |       |                                                |             |                                                 |      |      |      |       |                                                                       |
| 231                     | 708  | 4.560 | 2-methoxyphenol (Guaiacol)                     | 90-05-1     | C <sub>7</sub> H <sub>8</sub> O <sub>2</sub>    | 1096 | 1090 | [27] | [91]  | Smoke-like, phenolic, burnt, spicy, woody, meaty, sweet               |
| 232                     | 738  | 4.980 | 2,6-Dimethylphenol                             | 576-26-1    | C <sub>8</sub> H <sub>10</sub> O                | 1114 | 1108 | [48] | [91]  | Ground-coffee, phenolic                                               |
| 233                     | 876  | 1.540 | 2-Allylphenol                                  | 1745-81-9   | C <sub>9</sub> H <sub>10</sub> O                | 1194 | 1170 | [62] |       | -                                                                     |
| 234                     | 1020 | 3.090 | 4-Ethyl-2-methoxyphenol (4-Ethylguaiacol)      | 2785-89-9   | C <sub>9</sub> H <sub>12</sub> O <sub>2</sub>   | 1280 | 1290 | [3]  | [91]  | Smoky, clove-like, spicy, burnt, vanilla-like, sweet, ethereal, green |
| 235                     | 1080 | 4.670 | 2-Methoxy-4-vinylphenol (4-Vinylguaiacol)      | 7786-61-0   | C <sub>9</sub> H <sub>10</sub> O <sub>2</sub>   | 1319 | 1322 | [3]  | [91]  | Spicy, clove-like, phenolic, apple, rum, roasted peanut               |
| <b>Oxazoles</b>         |      |       |                                                |             |                                                 |      |      |      |       |                                                                       |
| 236                     | 120  | 0.750 | 4-Methyloxazole                                | 693-93-6    | C <sub>4</sub> H <sub>5</sub> NO                | 628  | -    | -    |       | -                                                                     |
| 237                     | 198  | 0.890 | 4,5-Dimethyloxazole                            | 20662-83-3  | C <sub>6</sub> H <sub>7</sub> NO                | 747  | 750  | [63] | [91]  | -                                                                     |
| 238                     | 312  | 0.850 | Trimethyloxazole                               | 20662-84-4  | C <sub>6</sub> H <sub>9</sub> NO                | 857  | 852  | [63] | [91]  | -                                                                     |
| 239                     | 426  | 0.780 | 4-Ethyl-2,5-dimethyloxazole                    | 30408-61-8  | C <sub>7</sub> H <sub>11</sub> NO               | 931  | 919  | [39] | [91]  | -                                                                     |
| 240                     | 570  | 0.730 | 2-Ethyl-4-methyl-5-propyloxazole               | 102586-53-8 | C <sub>9</sub> H <sub>15</sub> NO               | 1014 | -    | -    |       | -                                                                     |
| 241                     | 588  | 0.760 | 4,5-Dimethyl-2-propyloxazole                   | 53833-32-2  | C <sub>8</sub> H <sub>13</sub> NO               | 1025 | -    | -    | [91]  | -                                                                     |
| 242                     | 660  | 0.710 | 4,5-Dimethyl-2-isobutyloxazole                 | 26131-91-9  | C <sub>9</sub> H <sub>15</sub> NO               | 1066 | -    | -    |       | -                                                                     |
| 243                     | 696  | 3.000 | Benzoxazole                                    | 273-53-0    | C <sub>7</sub> H <sub>5</sub> NO                | 1088 | -    | -    | [91]  | -                                                                     |
| 244                     | 744  | 1.830 | 2-Methylbenzoxazole                            | 95-21-6     | C <sub>8</sub> H <sub>7</sub> NO                | 1115 | -    | -    | [91]  | Sweet, gassy-pungent, floral-sweet, tobacco                           |
| <b>Pyrazines</b>        |      |       |                                                |             |                                                 |      |      |      |       |                                                                       |
| 245                     | 180  | 1.230 | Pyrazine                                       | 290-37-9    | C <sub>4</sub> H <sub>4</sub> N <sub>2</sub>    | 720  | 729  | [28] | [91]  | Pungent, sweet, floral, coffee                                        |
| 246                     | 270  | 1.250 | Methylpyrazine                                 | 109-08-0    | C <sub>5</sub> H <sub>6</sub> N <sub>2</sub>    | 827  | 833  | [28] | [91]  | Nutty, cocoa, green, roasted, chocolate, meaty, toasted               |
| 247                     | 402  | 1.120 | 2,5-Dimethylpyrazine                           | 123-32-0    | C <sub>6</sub> H <sub>8</sub> N <sub>2</sub>    | 918  | 912  | [28] | [91]  | Chocolate, roasted nuts, earthy, grassy, roasted, nutty               |
| 248                     | 402  | 1.170 | 2-Ethylpyrazine                                | 13925-00-3  | C <sub>6</sub> H <sub>8</sub> N <sub>2</sub>    | 918  | 922  | [2]  | [91]  | Peanut butter, musty, nutty, woody, buttery, roasted, green, sweet    |
| 249                     | 414  | 1.190 | 2,3-Dimethylpyrazine                           | 5910-89-4   | C <sub>6</sub> H <sub>8</sub> N <sub>2</sub>    | 925  | 922  | [2]  | [91]  | Nutty, cocoa-like odor, green note, toasted, roasted                  |
| 250                     | 432  | 1.660 | Vinylpyrazine                                  | 4177-16-6   | C <sub>6</sub> H <sub>6</sub> N <sub>2</sub>    | 935  | 935  | [12] | [91]  | -                                                                     |
| 251                     | 492  | 1.020 | 2-Isopropylpyrazine                            | 9820-90-0   | C <sub>7</sub> H <sub>10</sub> N <sub>2</sub>   | 970  | -    | -    |       | -                                                                     |
| 252                     | 540  | 1.040 | 2-Ethyl-6-methylpyrazine                       | 13925-03-6  | C <sub>7</sub> H <sub>10</sub> N <sub>2</sub>   | 997  | 1000 | [28] | [91]  | Toasted, flowery, fruity, hazelnut-like                               |
| 253                     | 552  | 1.080 | 2-Ethyl-3-methylpyrazine                       | 15707-23-0  | C <sub>7</sub> H <sub>10</sub> N <sub>2</sub>   | 1004 | 1001 | [28] | [91]  | Raw-potato, roasted, earthy, nutty, peanut-like, coffee-like          |
| 254                     | 564  | 1.100 | 2-Propylpyrazine                               | 18138-03-9  | C <sub>7</sub> H <sub>10</sub> N <sub>2</sub>   | 1011 | 1010 | [63] | [91]  | Green, vegetable, herbal                                              |
| 255                     | 576  | 1.410 | 2-Vinyl-6-methylpyrazine                       | 13925-09-2  | C <sub>7</sub> H <sub>8</sub> N <sub>2</sub>    | 1018 | 1020 | [12] | [91]  | Coffee                                                                |
| 256                     | 588  | 2.470 | Acetylpyrazine                                 | 22047-25-2  | C <sub>6</sub> H <sub>6</sub> N <sub>2</sub> O  | 1026 | 1023 | [28] | [91]  | Toasted                                                               |
| 257                     | 636  | 0.920 | 2-Methyl-3-isopropylpyrazine                   | 15986-81-9  | C <sub>8</sub> H <sub>12</sub> N <sub>2</sub>   | 1052 | 1053 | [2]  |       | -                                                                     |
| 258                     | 654  | 1.000 | Isobutylpyrazine                               | 29460-92-2  | C <sub>8</sub> H <sub>12</sub> N <sub>2</sub>   | 1063 | -    | -    |       | -                                                                     |
| 259                     | 672  | 1.710 | Isopropenylpyrazine                            | 38713-41-6  | C <sub>7</sub> H <sub>8</sub> N <sub>2</sub>    | 1073 | 1075 | [63] | [91]  | -                                                                     |
| 260                     | 684  | 0.940 | 2,6-Diethylpyrazine                            | 13067-27-1  | C <sub>8</sub> H <sub>12</sub> N <sub>2</sub>   | 1080 | 1080 | [12] | [91]  | Toasted, potato-like, roasted                                         |
| 261                     | 714  | 0.880 | 2-Isopropyl-3-methoxypyrazine                  | 25773-40-4  | C <sub>8</sub> H <sub>12</sub> N <sub>2</sub> O | 1097 | 1094 | [64] | [91]  | Vegetable-like, earthy, bell pepper, raw potato, galbanum, roasty     |
| 262                     | 732  | 1.670 | 6,7-Dihydro-5H-cyclopentapyrazine              | 23747-47-9  | C <sub>7</sub> H <sub>8</sub> N <sub>2</sub>    | 1108 | 1104 | [65] | [91]  | Green, phenolic, nutty, roast                                         |
| 263                     | 756  | 1.970 | 2-Acetyl-3-methylpyrazine                      | 23787-80-6  | C <sub>7</sub> H <sub>8</sub> N <sub>2</sub> O  | 1123 | 1128 | [28] | [91]  | Cereal, roasted bean, roasted, nutty, grain-roasted potato            |
| 264                     | 780  | 0.930 | 2-Isobutyl-3-methylpyrazine                    | 13925-06-9  | C <sub>9</sub> H <sub>14</sub> N <sub>2</sub>   | 1136 | 1134 | [28] | [91]  | Herbaceous green earthy notes, green bell peppers                     |
| 265                     | 786  | 1.390 | 5H-5-Methyl-6,7-dihydrocyclopentapyrazine      | 23747-48-0  | C <sub>8</sub> H <sub>10</sub> N <sub>2</sub>   | 1140 | 1149 | [28] | [91]  | Earthy, baked potato, peanut, roasted, nutty                          |
| 266                     | 792  | 1.350 | 2-Methyl-6-(1-propenyl)pyrazine (isomer)       | 104638-11-1 | C <sub>8</sub> H <sub>10</sub> N <sub>2</sub>   | 1144 | -    | -    | [91]  | -                                                                     |
| 267                     | 816  | 0.830 | 2,3-Diethyl-5-methylpyrazine                   | 18138-04-0  | C <sub>9</sub> H <sub>14</sub> N <sub>2</sub>   | 1158 | 1153 | [12] | [91]  | Nutty, meaty, roasted hazelnut, earthy, roasty                        |
| 268                     | 822  | 1.450 | 2-Methyl-6-(1-propenyl)pyrazine (isomer)       | 104638-11-1 | C <sub>8</sub> H <sub>10</sub> N <sub>2</sub>   | 1162 | -    | -    | [91]  | -                                                                     |
| 269                     | 834  | 0.860 | 2-Acetyl-3-ethylpyrazine                       | 32974-92-8  | C <sub>8</sub> H <sub>10</sub> N <sub>2</sub> O | 1168 | 1172 | [28] | [28]  | -                                                                     |
| 270                     | 852  | 1.010 | 2-Isoamylpyrazine                              | 40790-22-5  | C <sub>9</sub> H <sub>14</sub> N <sub>2</sub>   | 1179 | -    | -    |       | -                                                                     |
| 271                     | 858  | 0.880 | 2-Isobutyl-3-methoxypyrazine                   | 24683-00-9  | C <sub>9</sub> H <sub>14</sub> N <sub>2</sub> O | 1183 | 1181 | [64] | [91]  | Green bell-pepper note, galbanum oil, red pepper, green, earthy       |
| 272                     | 870  | 0.940 | 2-Butyl-3-methylpyrazine                       | 15987-00-5  | C <sub>9</sub> H <sub>14</sub> N <sub>2</sub>   | 1190 | -    | -    | [91]  | -                                                                     |
| 273                     | 894  | 0.830 | 2,5-Dimethyl-3-isobutylpyrazine                | 32736-94-0  | C <sub>10</sub> H <sub>16</sub> N <sub>2</sub>  | 1204 | 1207 | [2]  | [91]  | -                                                                     |
| 274                     | 894  | 1.950 | 1-Methylpyrrolo(1,2-a)pyrazine                 | 64608-59-9  | C <sub>8</sub> H <sub>8</sub> N <sub>2</sub>    | 1205 | 1214 | [28] | [91]  | -                                                                     |
| 275                     | 924  | 1.160 | 6,7-Dihydro-2,5-dimethyl-5H-cyclopentapyrazine | 38917-61-2  | C <sub>9</sub> H <sub>12</sub> N <sub>2</sub>   | 1222 | 1220 | [31] | [91]  | -                                                                     |
| 276                     | 942  | 0.770 | 2,5-Diethyl-3,6-dimethylpyrazine               | 18903-30-5  | C <sub>10</sub> H <sub>16</sub> N <sub>2</sub>  | 1233 | 1225 | [66] | [91]  | -                                                                     |
| 277                     | 972  | 0.910 | 2-Methyl-6-isopentylpyrazine                   | 91010-41-2  | C <sub>10</sub> H <sub>16</sub> N <sub>2</sub>  | 1251 | 1257 | [28] |       | -                                                                     |
| 278                     | 1062 | 0.780 | 2,6-Dimethyl-3(2-methyl-1-butyl)pyrazine       | 56617-70-0  | C <sub>11</sub> H <sub>18</sub> N <sub>2</sub>  | 1305 | 1318 | [28] |       | -                                                                     |
| 279                     | 1080 | 0.800 | 2,5-Dimethyl-3-isoamylpyrazine                 | 18433-98-2  | C <sub>11</sub> H <sub>18</sub> N <sub>2</sub>  | 1317 | 1319 | [67] |       | -                                                                     |
| 280                     | 1092 | 0.850 | 2,3-Dimethyl-5-isopentylpyrazine               | 18450-01-6  | C <sub>11</sub> H <sub>18</sub> N <sub>2</sub>  | 1325 | 1332 | [68] |       | -                                                                     |
| <b>Pyridines</b>        |      |       |                                                |             |                                                 |      |      |      |       |                                                                       |
| 281                     | 186  | 1.090 | Pyridine                                       | 110-86-1    | C <sub>5</sub> H <sub>5</sub> N                 | 729  | 726  | [28] | [91]  | Pungent, nauseating, warm, burnt, smoky, coffee-like                  |
| 282                     | 270  | 1.020 | 2-Methylpyridine                               | 109-06-8    | C <sub>6</sub> H <sub>7</sub> N                 | 827  | 824  | [63] | [91]  | Roasted popcorn, coffee                                               |
| 283                     | 360  | 0.950 | 2,6-Dimethylpyridine                           | 108-48-5    | C <sub>7</sub> H <sub>9</sub> N                 | 892  | 887  | [5]  | [91]  | Minty-tarry, pyridine, peppermint                                     |
| 284                     | 390  | 0.980 | 2-Ethylpyridine                                | 100-71-0    | C <sub>7</sub> H <sub>9</sub> N                 | 911  | 919  | [31] | [91]  | -                                                                     |
| 285                     | 480  | 1.200 | 3-Ethylpyridine                                | 536-78-7    | C <sub>7</sub> H <sub>9</sub> N                 | 963  | 963  | [28] | [91]  | Tobacco, caramel, burnt, coffee-like, toasted                         |
| 286                     | 498  | 1.700 | 3-Vinylpyridine                                | 1121-55-7   | C <sub>7</sub> H <sub>7</sub> N                 | 973  | 972  | [5]  |       | -                                                                     |
| 287                     | 600  | 2.130 | 2-Acetylpyridine                               | 1122-62-9   | C <sub>7</sub> H <sub>7</sub> NO                | 1032 | 1045 | [28] | [91]  | Popcorn, bready, tobacco, cracker-like, roasted barley                |

|                           |      |       |                                     |            |                                                 |      |      |      |       |                                                                    |                           |
|---------------------------|------|-------|-------------------------------------|------------|-------------------------------------------------|------|------|------|-------|--------------------------------------------------------------------|---------------------------|
| 288                       | 786  | 2.450 | Methyl 3-pyridinecarboxylate        | 93-60-7    | C <sub>7</sub> H <sub>7</sub> NO <sub>2</sub>   | 1141 | 1137 | [5]  | [91]  | Nauseating, sweet-herbaceous, mildly tobacco-like, fresh, caramel  | [114, 116]                |
| 289                       | 888  | 0.920 | 2-Pentylpyridine                    | 2294-76-0  | C <sub>10</sub> H <sub>15</sub> N               | 1201 | 1205 | [69] |       | Tallowy-like                                                       | [116]                     |
| <b>Pyrroles</b>           |      |       |                                     |            |                                                 |      |      |      |       |                                                                    |                           |
| 290                       | 180  | 0.910 | 1-Methylpyrrole                     | 96-54-8    | C <sub>5</sub> H <sub>7</sub> N                 | 720  | 731  | [28] | [91]  | Smokey-tarry, sweet, woody-herbaceous, animal, coffee              | [109, 114]                |
| 291                       | 204  | 5.870 | Pyrrole                             | 109-97-7   | C <sub>4</sub> H <sub>5</sub> N                 | 763  | 768  | [28] | [91]  | Warm, slightly pungent, hay-like herbaceous, sweet, green, toasted | [109, 114, 116, 129]      |
| 292                       | 252  | 0.920 | 1-Ethylpyrrole                      | 617-92-5   | C <sub>6</sub> H <sub>9</sub> N                 | 814  | 818  | [63] | [91]  | -                                                                  |                           |
| 293                       | 330  | 1.100 | 2,5-Dimethylpyrrole                 | 625-84-3   | C <sub>6</sub> H <sub>9</sub> N                 | 870  | 867  | [28] | [91]  | -                                                                  |                           |
| 294                       | 426  | 0.970 | 2-Ethyl-4-methylpyrrole             | 69687-77-0 | C <sub>7</sub> H <sub>11</sub> N                | 932  | 938  | [70] | [98]  | -                                                                  |                           |
| 295                       | 474  | 2.390 | 1-Acetylpyrrole                     | 609-41-6   | C <sub>6</sub> H <sub>7</sub> NO                | 960  | 957  | [71] | [91]  | -                                                                  |                           |
| 296                       | 528  | 0.920 | 3-Ethyl-2,4-dimethylpyrrole         | 517-22-6   | C <sub>8</sub> H <sub>13</sub> N                | 990  | 988  | [28] | [91]  | -                                                                  |                           |
| 297                       | 552  | 2.590 | 1-Methyl-2-formylpyrrole            | 1192-58-1  | C <sub>6</sub> H <sub>7</sub> NO                | 1005 | 1010 | [5]  | [91]  | Cracker-popcorn, burnt                                             | [129, 130]                |
| 298                       | 630  | 2.020 | 1-Ethyl-2-formylpyrrole             | 2167-14-8  | C <sub>7</sub> H <sub>9</sub> NO                | 1049 | 1067 | [70] | [91]  | -                                                                  |                           |
| 299                       | 672  | 2.070 | 2-Acetyl-1-methylpyrrole            | 932-16-1   | C <sub>7</sub> H <sub>9</sub> NO                | 1074 | 1096 | [31] | [91]  | -                                                                  |                           |
| 300                       | 672  | 2.850 | 2-Acetylpyrrole                     | 1072-83-9  | C <sub>6</sub> H <sub>7</sub> NO                | 1074 | 1098 | [28] | [91]  | Bread, walnut, licorice, cracker, popcorn-like                     | [109, 116, 130]           |
| <b>Sulfur compounds</b>   |      |       |                                     |            |                                                 |      |      |      |       |                                                                    |                           |
| 301                       | 180  | 0.710 | Dimethyl disulfide                  | 624-92-0   | C <sub>2</sub> H <sub>6</sub> S <sub>2</sub>    | 719  | 719  | [3]  | [91]  | Onion                                                              | [114, 116]                |
| 302                       | 294  | 1.550 | Methylthio-2-propanone              | 14109-72-9 | C <sub>4</sub> H <sub>8</sub> OS                | 845  | 863  | [72] |       | Melon                                                              | [116]                     |
| 303                       | 354  | 1.440 | 2-Furylmethylsulfide                | 13129-38-9 | C <sub>5</sub> H <sub>6</sub> OS                | 888  | 894  | [73] | [91]  | Garlic-like                                                        | [130]                     |
| 304                       | 390  | 1.870 | 2-Furfurylthiol                     | 98-02-2    | C <sub>5</sub> H <sub>6</sub> OS                | 911  | 918  | [63] | [91]  | Coffee-like, caramellic-burnt, sweet, roasty, sulfury              | [114, 118, 121, 128, 129] |
| 305                       | 390  | 2.060 | 3-(Methylthio)propanal (Methional)  | 3268-49-3  | C <sub>6</sub> H <sub>8</sub> OS                | 912  | 912  | [4]  | [91]  | Onion, meat-like, bouillon-like, soup-like, cooked potato-like     | [114, 116, 117, 123, 128] |
| 306                       | 444  | 1.420 | 1-(Methylthio)-2-butanone           | 13678-58-5 | C <sub>5</sub> H <sub>10</sub> OS               | 942  | -    | -    | [91]  | Mushroom, garlic                                                   | [116, 130]                |
| 307                       | 486  | 1.190 | Dimethyl trisulfide                 | 3658-80-8  | C <sub>2</sub> H <sub>6</sub> S <sub>3</sub>    | 966  | 969  | [4]  | [91]  | Fresh onion, cabbage-like, brothy, sulfury, pungent                | [98, 114, 116, 128]       |
| 308                       | 510  | 3.580 | 3-Mercapto-3-methyl-1-butanol       | 34300-94-2 | C <sub>5</sub> H <sub>12</sub> OS               | 981  | -    |      | [91]  | Sweet, soup-like, cooked meat, spicy, smoke-roast, meaty, chicken  | [98, 124, 130]            |
| 309                       | 546  | 1.520 | 2-Furfuryl methyl sulfide           | 1438-91-1  | C <sub>6</sub> H <sub>8</sub> OS                | 1001 | 995  | [74] | [91]  | Coffee-like, onion, garlic, burnt, sulfury, cooked cabbage         | [98, 109, 116, 130]       |
| 310                       | 582  | 1.540 | 3-Mercapto-3-methylbutyl formate    | 50746-10-6 | C <sub>6</sub> H <sub>12</sub> O <sub>2</sub> S | 1022 | 1020 | [75] | [91]  | Sweaty, fruity, black currant-like, catty, orange flowers, roasty  | [118, 121, 124, 128, 130] |
| 311                       | 732  | 1.230 | 3-Mercapto-3-methylbutyl acetate    | 50746-09-3 | C <sub>7</sub> H <sub>14</sub> O <sub>2</sub> S | 1108 | -    | [76] | [112] | -                                                                  |                           |
| 312                       | 906  | 1.950 | Furfuryl methyl disulfide           | 57500-00-2 | C <sub>6</sub> H <sub>8</sub> OS <sub>2</sub>   | 1212 | 1226 | [29] | [91]  | Fresh white bread crust                                            | [130]                     |
| <b>Terpenic compounds</b> |      |       |                                     |            |                                                 |      |      |      |       |                                                                    |                           |
| <i>Monoterpenes</i>       |      |       |                                     |            |                                                 |      |      |      |       |                                                                    |                           |
| 313                       | 426  | 0.440 | α-Pinene                            | 80-56-8    | C <sub>10</sub> H <sub>16</sub>                 | 931  | 932  | [3]  | [99]  | Pine, turpentine-like                                              | [116]                     |
| 314                       | 498  | 0.490 | β-Pinene                            | 127-91-3   | C <sub>10</sub> H <sub>16</sub>                 | 973  | 982  | [77] | [99]  | Turpentine, dry, woody, resinous                                   | [116]                     |
| 315                       | 522  | 0.470 | 2,6-Dimethyl-2,6-octadiene (isomer) | 2792-39-4  | C <sub>10</sub> H <sub>18</sub>                 | 986  | 990  | [78] |       | -                                                                  |                           |
| 316                       | 528  | 0.540 | β-Myrcene                           | 123-35-3   | C <sub>10</sub> H <sub>16</sub>                 | 990  | 988  | [1]  | [91]  | Sweet, balsamic, plastic, sweet-balsamic-resinous gum              | [114, 116]                |
| 317                       | 552  | 0.470 | 2,6-Dimethyl-2,6-octadiene (isomer) | 2792-39-4  | C <sub>10</sub> H <sub>18</sub>                 | 1004 | 990  | [78] |       | -                                                                  |                           |
| 318                       | 552  | 0.560 | α-Phellandrene                      | 99-83-2    | C <sub>10</sub> H <sub>16</sub>                 | 1004 | 1007 | [77] | [113] | Fresh, citrus, peppery, discrete mint, minty, herbaceous           | [116]                     |
| 319                       | 570  | 0.560 | α-Terpinene                         | 99-86-5    | C <sub>10</sub> H <sub>16</sub>                 | 1014 | 1016 | [2]  | [99]  | Woody, terpene, lemon                                              | [116]                     |
| 320                       | 582  | 0.670 | p-Cymene                            | 99-87-6    | C <sub>10</sub> H <sub>14</sub>                 | 1021 | 1026 | [79] | [91]  | Carrot-like, kerosene-like                                         | [114, 116]                |
| 321                       | 594  | 0.550 | Limonene                            | 138-86-3   | C <sub>10</sub> H <sub>16</sub>                 | 1028 | 1031 | [46] | [91]  | Citrusy, lemon-like, fresh, sweet                                  | [130]                     |
| 322                       | 612  | 0.590 | β-Ocimene (isomer)                  | 13877-91-3 | C <sub>10</sub> H <sub>16</sub>                 | 1038 | 1042 | [77] | [97]  | Warm herbaceous                                                    | [116]                     |
| 323                       | 630  | 0.610 | β-Ocimene (isomer)                  | 13877-91-3 | C <sub>10</sub> H <sub>16</sub>                 | 1049 | 1042 | [77] | [97]  | Warm herbaceous                                                    | [116]                     |
| 324                       | 648  | 0.600 | γ-Terpinene                         | 99-85-4    | C <sub>10</sub> H <sub>16</sub>                 | 1059 | 1062 | [80] | [99]  | Lemon                                                              | [116]                     |
| 325                       | 696  | 0.610 | α-Terpinolene                       | 586-62-9   | C <sub>10</sub> H <sub>16</sub>                 | 1087 | 1093 | [77] |       | Sweet, pine                                                        | [116]                     |
| 326                       | 702  | 0.940 | p-Cymenene                          | 1195-32-0  | C <sub>10</sub> H <sub>12</sub>                 | 1090 | 1095 | [81] | [91]  | Citrusy-lemon-like, gassy                                          | [114]                     |
| 327                       | 786  | 0.790 | Cosmene                             | 460-01-5   | C <sub>10</sub> H <sub>14</sub>                 | 1140 | 1134 | [82] |       | -                                                                  |                           |
| 328                       | 798  | 0.670 | Allo-ocimene                        | 673-84-7   | C <sub>10</sub> H <sub>16</sub>                 | 1147 | 1144 | [80] |       | -                                                                  |                           |
| <i>Monoterpenoids</i>     |      |       |                                     |            |                                                 |      |      |      |       |                                                                    |                           |
| 329                       | 672  | 0.970 | Linalool oxide (isomer)             | 1365-19-1  | C <sub>10</sub> H <sub>18</sub> O <sub>2</sub>  | 1073 | 1078 | [83] | [91]  | Sweet, woody, floral, woody-earthly undertone, pungent             | [114, 116]                |
| 330                       | 702  | 0.970 | Linalool oxide (isomer)             | 1365-19-1  | C <sub>10</sub> H <sub>18</sub> O <sub>2</sub>  | 1090 | 1078 | [83] | [91]  | Sweet, woody, floral, woody-earthly undertone, pungent             | [114, 116]                |
| 331                       | 720  | 1.220 | Linalool                            | 78-70-6    | C <sub>10</sub> H <sub>18</sub> O               | 1101 | 1101 | [2]  | [91]  | Floral-woody, faintly citrusy note, floral, sweet-fruity           | [114-116, 118, 124, 125]  |
| 332                       | 876  | 1.430 | α-Terpineol                         | 98-55-5    | C <sub>10</sub> H <sub>18</sub> O               | 1194 | 1206 | [80] | [91]  | Floral, lilac                                                      | [130]                     |
| 333                       | 888  | 1.200 | Safranal                            | 116-26-7   | C <sub>10</sub> H <sub>14</sub> O               | 1201 | 1201 | [5]  |       | Saffron-like                                                       | [116]                     |
| 334                       | 918  | 1.050 | p-Menth-1-en-9-al                   | 29548-14-9 | C <sub>10</sub> H <sub>16</sub> O               | 1219 | 1219 | [80] |       | -                                                                  |                           |
| <i>Sesquiterpenes</i>     |      |       |                                     |            |                                                 |      |      |      |       |                                                                    |                           |
| 335                       | 1152 | 0.560 | α-Cubebene                          | 17699-14-8 | C <sub>15</sub> H <sub>24</sub>                 | 1364 | 1366 | [84] |       | -                                                                  |                           |
| 336                       | 1170 | 0.560 | α-Copaene                           | 3856-25-5  | C <sub>15</sub> H <sub>24</sub>                 | 1376 | 1375 | [84] | [28]  | -                                                                  |                           |
| 337                       | 1212 | 0.610 | Longifolene                         | 475-20-7   | C <sub>15</sub> H <sub>24</sub>                 | 1405 | 1395 | [84] |       | -                                                                  |                           |
| 338                       | 1236 | 0.620 | β-Caryophyllene                     | 87-44-5    | C <sub>15</sub> H <sub>24</sub>                 | 1421 | 1417 | [84] |       | Cloves, turpentine                                                 | [116]                     |
| 339                       | 1296 | 0.650 | α-Humulene                          | 6753-98-6  | C <sub>15</sub> H <sub>24</sub>                 | 1455 | 1450 | [84] |       | -                                                                  |                           |
| 340                       | 1356 | 0.660 | α-Muurolene                         | 31983-22-9 | C <sub>15</sub> H <sub>24</sub>                 | 1505 | 1490 | [84] |       | -                                                                  |                           |
| 341                       | 1386 | 0.660 | δ-Cadinene                          | 483-76-1   | C <sub>15</sub> H <sub>24</sub>                 | 1525 | 1525 | [84] | [28]  | -                                                                  |                           |
| <b>Norisoprenoids</b>     |      |       |                                     |            |                                                 |      |      |      |       |                                                                    |                           |
| 342                       | 1020 | 0.710 | Vitispirane (C <sub>13</sub> )      | 65416-59-3 | C <sub>13</sub> H <sub>20</sub> O               | 1279 | 1289 | [3]  |       | -                                                                  |                           |
| 343                       | 1098 | 0.850 | Theaspirane (C <sub>13</sub> )      | 36431-72-8 | C <sub>13</sub> H <sub>22</sub> O               | 1329 | 1315 | [85] |       | Fruity, woody, sweetish                                            | [116]                     |

|                           |      |       |                                                                 |            |                                                |      |      |      |          |                                                                 |                          |
|---------------------------|------|-------|-----------------------------------------------------------------|------------|------------------------------------------------|------|------|------|----------|-----------------------------------------------------------------|--------------------------|
| 344                       | 1134 | 0.980 | 1,2-Dihydro-1,1,6-trimethylnaphthalene (TDN) (C <sub>13</sub> ) | 30364-38-6 | C <sub>13</sub> H <sub>16</sub>                | 1353 | 1363 | [3]  |          | -                                                               |                          |
| 345                       | 1182 | 1.070 | β-Damascenone (C <sub>13</sub> )                                | 23726-93-4 | C <sub>13</sub> H <sub>18</sub> O              | 1385 | 1395 | [3]  | [91]     | Tea-like, fruity, honey-like, fruity, sweet-fruity              | [118, 121, 124-127, 130] |
| 346                       | 1248 | 1.000 | α-Ionone (C <sub>13</sub> )                                     | 127-41-3   | C <sub>13</sub> H <sub>20</sub> O              | 1430 | 1439 | [11] |          | Warm, woody, berry characteristic violet-like                   | [116]                    |
| 347                       | 1290 | 0.960 | Geranyl acetone (C <sub>13</sub> )                              | 689-67-8   | C <sub>13</sub> H <sub>22</sub> O              | 1459 | 1463 | [3]  |          | Green and rosy floral, fresh-floral, sweet-rosy, slightly green | [116]                    |
| <b>Thiazoles</b>          |      |       |                                                                 |            |                                                |      |      |      |          |                                                                 |                          |
| 348                       | 180  | 1.470 | Thiazole                                                        | 288-47-1   | C <sub>3</sub> H <sub>5</sub> NS               | 720  | 730  | [63] | [91]     | Green, sweet, nutty, tomato, toasted                            | [109, 116]               |
| 349                       | 252  | 1.150 | 2-Methylthiazole                                                | 3581-87-1  | C <sub>4</sub> H <sub>5</sub> NS               | 814  | 815  | [63] | [91]     | -                                                               |                          |
| 350                       | 264  | 1.350 | 4-Methylthiazole                                                | 693-95-8   | C <sub>4</sub> H <sub>5</sub> NS               | 823  | 823  | [28] | [91]     | Nutty, green, roasted                                           | [116, 129]               |
| 351                       | 294  | 1.330 | 5-Methylthiazole                                                | 3581-89-3  | C <sub>4</sub> H <sub>5</sub> NS               | 844  | 846  | [86] | [91]     | -                                                               |                          |
| 352                       | 360  | 1.040 | 2,4-Dimethylthiazole                                            | 541-58-2   | C <sub>5</sub> H <sub>7</sub> NS               | 892  | 892  | [86] | [91]     | Salty, sulfury, burnt, rubber                                   | [98]                     |
| 353                       | 408  | 1.080 | 2,5-Dimethylthiazole                                            | 4175-66-0  | C <sub>5</sub> H <sub>7</sub> NS               | 921  | 934  | [72] | [91]     | -                                                               |                          |
| 354                       | 432  | 1.270 | 4,5-Dimethylthiazole                                            | 3581-91-7  | C <sub>5</sub> H <sub>7</sub> NS               | 935  | 947  | [63] | [91]     | Roasted nutty, boiled poultry                                   | [116]                    |
| 355                       | 462  | 1.320 | 5-Ethylthiazole                                                 | 17626-73-2 | C <sub>5</sub> H <sub>7</sub> NS               | 952  | 955  | [63] | [91]     | -                                                               |                          |
| 356                       | 498  | 0.970 | 2-Ethyl-4-methylthiazole                                        | 15679-12-6 | C <sub>6</sub> H <sub>9</sub> NS               | 973  | -    | -    | [91]     | Nutty, green                                                    | [116]                    |
| 357                       | 540  | 1.220 | 4-Propylthiazole                                                | 41981-60-6 | C <sub>6</sub> H <sub>9</sub> NS               | 997  | -    | -    |          | -                                                               |                          |
| 358                       | 564  | 1.030 | 5-Ethyl-2-methylthiazole                                        | 19961-52-5 | C <sub>6</sub> H <sub>9</sub> NS               | 1011 | 1015 | [86] | [91]     | Rubber-like                                                     | [126]                    |
| 359                       | 576  | 0.870 | 2-Isopropyl-4-methylthiazole                                    | 15679-13-7 | C <sub>7</sub> H <sub>11</sub> NS              | 1018 | -    | -    |          | Green, vegetable, nutty, rooty, earthy                          | [116]                    |
| 360                       | 576  | 1.150 | 5-Ethyl-4-methylthiazole                                        | 31883-01-9 | C <sub>6</sub> H <sub>9</sub> NS               | 1018 | 1039 | [86] | [91]     | Nutty, green, earthy                                            | [130]                    |
| 361                       | 576  | 2.690 | 2-Acetylthiazole                                                | 24295-03-2 | C <sub>5</sub> H <sub>5</sub> NOS              | 1019 | 1036 | [63] | [91]     | Green onion, herbal, grassy                                     | [116]                    |
| 362                       | 660  | 0.880 | 4-Ethyl-2,5-dimethylthiazole                                    | 32272-57-4 | C <sub>7</sub> H <sub>11</sub> NS              | 1066 | 1066 | [86] | [91]     | -                                                               |                          |
| 363                       | 678  | 0.940 | 5-Ethyl-2,4-dimethylthiazole                                    | 38205-61-7 | C <sub>7</sub> H <sub>11</sub> NS              | 1076 | 1078 | [86] | [91]     | Earthy, roasty                                                  | [118]                    |
| 364                       | 738  | 1.990 | 2-Acetyl-4-methylthiazole                                       | 7533-07-5  | C <sub>6</sub> H <sub>7</sub> NOS              | 1112 | 1128 | [70] | [91]     | -                                                               |                          |
| 365                       | 756  | 2.220 | 2-Propanoyl-thiazole                                            | 43039-98-1 | C <sub>6</sub> H <sub>7</sub> NOS              | 1123 | 1119 | [39] |          | -                                                               |                          |
| 366                       | 930  | 2.900 | Benzothiazole                                                   | 95-16-9    | C <sub>7</sub> H <sub>5</sub> NS               | 1227 | 1231 | [2]  | [91]     | Delicate, persistent, rose-like                                 | [116]                    |
| <b>Tiophene compounds</b> |      |       |                                                                 |            |                                                |      |      |      |          |                                                                 |                          |
| 367                       | 126  | 0.650 | Thiophene                                                       | 110-02-1   | C <sub>4</sub> H <sub>4</sub> S                | 637  | 626  | [49] | [91]     | -                                                               |                          |
| 368                       | 204  | 0.730 | 2-Methylthiophene                                               | 554-14-3   | C <sub>5</sub> H <sub>6</sub> S                | 756  | 771  | [63] | [91]     | Onion, sulfury                                                  | [130]                    |
| 369                       | 216  | 0.770 | 3-Methylthiophene                                               | 616-44-4   | C <sub>5</sub> H <sub>6</sub> S                | 774  | 783  | [63] | [91]     | -                                                               |                          |
| 370                       | 324  | 0.780 | 2-Ethylthiophene                                                | 872-55-9   | C <sub>6</sub> H <sub>6</sub> S                | 866  | 872  | [63] | [95, 97] | -                                                               |                          |
| 371                       | 330  | 0.740 | 2,5-Dimethylthiophene                                           | 638-02-8   | C <sub>6</sub> H <sub>6</sub> S                | 870  | 877  | [63] | [98]     | -                                                               |                          |
| 372                       | 342  | 0.800 | 2,4-Dimethylthiophene                                           | 638-00-6   | C <sub>6</sub> H <sub>6</sub> S                | 879  | 882  | [63] |          | -                                                               |                          |
| 373                       | 354  | 0.840 | 2,3-Dimethylthiophene                                           | 632-16-6   | C <sub>6</sub> H <sub>6</sub> S                | 888  | 898  | [63] | [98]     | -                                                               |                          |
| 374                       | 378  | 1.300 | 2-Vinylthiophene                                                | 1918-82-7  | C <sub>6</sub> H <sub>6</sub> S                | 904  | 915  | [63] | [98]     | -                                                               |                          |
| 375                       | 414  | 1.660 | 3-Methoxythiophene                                              | 17573-92-1 | C <sub>5</sub> H <sub>6</sub> OS               | 925  | -    | -    |          | -                                                               |                          |
| 376                       | 456  | 2.670 | 3-Thiophanone                                                   | 1003-04-9  | C <sub>4</sub> H <sub>4</sub> OS               | 950  | 942  | [87] | [91]     | Garlic meaty, green vegetable, buttery                          | [116]                    |
| 377                       | 492  | 0.790 | 2-Isopropylthiophene                                            | 4095-22-1  | C <sub>7</sub> H <sub>10</sub> S               | 969  | 976  | [88] |          | -                                                               |                          |
| 378                       | 510  | 0.780 | 2,3,4-Trimethylthiophene                                        | 1795-04-6  | C <sub>7</sub> H <sub>10</sub> S               | 980  | 993  | [89] |          | -                                                               |                          |
| 379                       | 522  | 1.890 | Dihydro-2-methyl-3(2H)-thiophenone                              | 13679-85-1 | C <sub>5</sub> H <sub>6</sub> OS               | 987  | 995  | [63] | [91]     | -                                                               |                          |
| 380                       | 528  | 3.660 | 3-Thiophenecarboxaldehyde                                       | 498-62-4   | C <sub>5</sub> H <sub>4</sub> OS               | 992  | 1003 | [49] |          | -                                                               |                          |
| 381                       | 540  | 2.880 | Dihydro-2(3H)-thiophenone                                       | 1003-10-7  | C <sub>4</sub> H <sub>6</sub> OS               | 998  | -    | -    | [91]     | -                                                               |                          |
| 382                       | 546  | 3.670 | 2-Thiophenecarboxaldehyde                                       | 98-03-3    | C <sub>5</sub> H <sub>4</sub> OS               | 1002 | 1004 | [90] | [91]     | Coffee                                                          | [109]                    |
| 383                       | 690  | 2.550 | 3-Methyl-2-thiophenecarboxaldehyde                              | 5834-16-2  | C <sub>6</sub> H <sub>6</sub> OS               | 1084 | 1105 | [66] | [91]     | -                                                               |                          |
| 384                       | 690  | 3.220 | 3-Acetylthiophene                                               | 1468-83-3  | C <sub>6</sub> H <sub>6</sub> OS               | 1085 | -    | -    | [91]     | -                                                               |                          |
| 385                       | 702  | 3.180 | 2-Acetylthiophene                                               | 88-15-3    | C <sub>6</sub> H <sub>6</sub> OS               | 1092 | 1112 | [63] | [91]     | -                                                               |                          |
| 386                       | 708  | 0.830 | 2,5-Diethylthiophene                                            | 5069-23-8  | C <sub>8</sub> H <sub>12</sub> S               | 1094 | -    | -    |          | -                                                               |                          |
| 387                       | 738  | 2.260 | Methyl-2-thiophene carboxylate                                  | 5380-42-7  | C <sub>6</sub> H <sub>6</sub> O <sub>2</sub> S | 1112 | -    | -    | [91]     | -                                                               |                          |
| 388                       | 750  | 2.680 | 5-Methyl-2-thiophenecarboxaldehyde                              | 13679-70-4 | C <sub>6</sub> H <sub>6</sub> OS               | 1120 | 1124 | [39] | [91]     | -                                                               |                          |
| 389                       | 822  | 0.770 | 2-Pentylthiophene                                               | 4861-58-9  | C <sub>9</sub> H <sub>14</sub> S               | 1161 | 1165 | [63] |          | -                                                               |                          |
| 390                       | 864  | 2.390 | 2-Propionylthiophene                                            | 13679-75-9 | C <sub>7</sub> H <sub>8</sub> OS               | 1187 | 1181 | [90] | [91]     | -                                                               |                          |

<sup>a</sup> Retention times for first (<sup>1</sup>*t<sub>R</sub>*) and second (<sup>2</sup>*t<sub>R</sub>*) dimension in seconds.

<sup>b</sup> RI<sub>Calc</sub>: Retention Index obtained through the modulated chromatogram.

<sup>c</sup> RI<sub>Lit</sub>: Retention Index reported in the literature for 5% phenyl polysilphenylene-siloxane GC column or equivalents [1-90].

<sup>d</sup> Compound already identified in roasted coffee beans and/or brews [28, 91-113].

<sup>e</sup> Aroma descriptors [98, 109, 114-130].



## References

1. Martins, C., et al., *Insights on beer volatile profile: Optimization of solid-phase microextraction procedure taking advantage of the comprehensive two-dimensional gas chromatography structured separation*. Journal of Separation Science, 2015. **38**(12): p. 2140-2148.
2. Alves, Z., et al., *Exploring the <italic>Saccharomyces cerevisiae</italic> Volatile Metabolome: Indigenous versus Commercial Strains*. Plos One, 2015. **10**(11): p. e0143641.
3. Santos, M.C., et al., *High pressure treatments accelerate changes in volatile composition of sulphur dioxide-free wine during bottle storage*. Food Chemistry, 2015. **188**: p. 406-414.
4. Costa, C.P., et al., *Shedding light on Aspergillus niger volatile exometabolome*. Scientific Reports, 2016. **6**: p. 27441.
5. Leffingwell, J.C. and E.D. Alford, *Volatile constituents of Perique tobacco*. Electron. J. Environ. Agric. Food Chem., 2005. **4**(2): p. 899-915.
6. Bellesia, F., et al., *Volatile Compounds of the White Truffle (Tuber magnatum Pico) from Middle Italy*. Flavour and Fragrance Journal, 1996. **11**(4): p. 239-243.
7. Mebazaa, R., et al., *Characterisation of volatile compounds in Tunisian fenugreek seeds*. Food Chemistry, 2009. **115**(4): p. 1326-1336.
8. Rocha, S.M., et al., *Exploring the potentialities of comprehensive two-dimensional gas chromatography coupled to time of flight mass spectrometry to distinguish bivalve species: Comparison of two clam species (Venerupis decussata and Venerupis philippinarum)*. Journal of Chromatography A, 2013. **1315**: p. 152-161.
9. Miyazaki, T., et al., *Distribution of aroma volatile compounds in tangerine hybrids and proposed inheritance*. Journal of the Science of Food and Agriculture, 2011. **91**(3): p. 449-460.
10. Romeo, V., et al., *Headspace Volatiles of Vicia sativa L. (Leguminosae) by Solid-Phase Microextraction and Gas Chromatography/Mass Spectrometry*. Journal of Essential Oil Research, 2009. **21**(1): p. 33-35.
11. Silva, I., et al., *Headspace solid-phase microextraction combined with comprehensive two-dimensional gas chromatography time-of-flight mass spectrometry for the determination of volatile compounds from marine salt*. Journal of Chromatography A, 2010. **1217**(34): p. 5511-5521.
12. van Loon, W.A.M., et al., *Identification and olfactometry of French fries flavour extracted at mouth conditions*. Food Chemistry, 2005. **90**(3): p. 417-425.
13. Bauchot, A.D., et al., *Effect of Aminocyclopropane-1-carboxylic Acid Oxidase Antisense Gene on the Formation of Volatile Esters in Cantaloupe Charentais Melon (Cv. Védrandais)*. Journal of Agricultural and Food Chemistry, 1998. **46**(11): p. 4787-4792.
14. Maia, J.G.S., E.H.A. Andrade, and M.d.G.B. Zoghbi, *Volatile Constituents of the Leaves, Fruits and Flowers of Cashew (Anacardium occidentale L.)*. Journal of Food Composition and Analysis, 2000. **13**(3): p. 227-232.
15. Scheidig, C., M. Czerny, and P. Schieberle, *Changes in key odorants of raw coffee beans during storage under defined conditions*. Journal of Agricultural and Food Chemistry, 2007. **55**(14): p. 5768-5775.
16. Figuéredo, G., et al., *Studies of Mediterranean oregano populations—V. Chemical composition of essential oils of oregano: Origanum syriacum L. var. bevanii (Holmes) Ietswaart, O. syriacum L. var. sinaicum (Boiss.) Ietswaart, and O. syriacum L. var. syriacum from Lebanon and Israel*. Flavour and Fragrance Journal, 2005. **20**(2): p. 164-168.
17. Sampaio, T.S. and P.C.L. Nogueira, *Volatile components of mangaba fruit (Hancornia speciosa Gomes) at three stages of maturity*. Food Chemistry, 2006. **95**(4): p. 606-610.
18. Tret'yakov, K.V., *Retention Data. NIST Mass Spectrometry Data Center*. 2007.
19. Costa, R., et al., *An investigation on the volatile composition of some Artemisia species from Iran*. Flavour and Fragrance Journal, 2009. **24**(2): p. 75-82.
20. Zhao, J., et al., *Chemical composition of the volatiles of three wild Bergenia species from western China*. Flavour and Fragrance Journal, 2006. **21**(3): p. 431-434.
21. Isidorov, V.A., et al., *Partition coefficients of alkyl aromatic hydrocarbons and esters in a hexane–acetonitrile system*. Journal of Chromatography A, 2001. **923**(1–2): p. 127-136.
22. Cao, H., Z. Li, and X. Chen, *QSRR Study of GC Retention Indices of Volatile Compounds Emitted from Mosla chinensis Maxim by Multiple Linear Regression*. Chinese Journal of Chemistry, 2011. **29**(10): p. 2187-2196.
23. Rodríguez-Burruezo, A., et al., *Analysis of the Volatile Aroma Constituents of Parental and Hybrid Clones of Pepino (Solanum muricatum)*. Journal of Agricultural and Food Chemistry, 2004. **52**(18): p. 5663-5669.
24. Spadone, J.C., G. Takeoka, and R. Liardon, *Analytical Investigation of Rio Off-Flavor in Green Coffee*. Journal of Agricultural and Food Chemistry, 1990. **38**(1): p. 226-233.
25. Ferreira, L.R., et al., *Aqueous phase reactions of pentoses in the presence of nanocrystalline zeolite beta: Identification of by-products and kinetic modelling*. Chemical Engineering Journal, 2013. **215–216**: p. 772-783.
26. Antunes, M.M., et al., *Catalytic dehydration of d-xylose to 2-furfuraldehyde in the presence of Zr-(W,Al) mixed oxides. Tracing by-products using two-dimensional gas chromatography-time-of-flight mass spectrometry*. Catalysis Today, 2012. **195**(1): p. 127-135.
27. Perestrelo, R., et al., *In-Depth Search Focused on Furans, Lactones, Volatile Phenols, and Acetals As Potential Age Markers of Madeira Wines by Comprehensive Two-Dimensional Gas Chromatography with Time-of-Flight Mass Spectrometry Combined with Solid Phase Microextraction*. Journal of Agricultural and Food Chemistry, 2011. **59**(7): p. 3186-3204.
28. Risticvic, S., E. Carasek, and J. Pawliszyn, *Headspace solid-phase microextraction–gas chromatographic–time-of-flight mass spectrometric methodology for geographical origin verification of coffee*. Analytica Chimica Acta, 2008. **617**(1–2): p. 72-84.

29. Elmore, J.S., et al., *Effect of the Polyunsaturated Fatty Acid Composition of Beef Muscle on the Profile of Aroma Volatiles*. Journal of Agricultural and Food Chemistry, 1999. **47**(4): p. 1619-1625.
30. Solina, M., et al., *Volatile aroma components of soy protein isolate and acid-hydrolysed vegetable protein*. Food Chemistry, 2005. **90**(4): p. 861-873.
31. Ames, J.M., R.C.E. Guy, and G.J. Kipping, *Effect of pH, Temperature, and Moisture on the Formation of Volatile Compounds in Glycine/Glucose Model Systems*. Journal of Agricultural and Food Chemistry, 2001. **49**(9): p. 4315-4323.
32. Xu, X., et al., *Comprehensive two-dimensional gas chromatography (GC x GC) measurements of volatile organic compounds in the atmosphere*. Atmospheric Chemistry and Physics, 2003. **3**: p. 665-682.
33. Neves, P., et al., *Production of biomass-derived furanic ethers and levulinate esters using heterogeneous acid catalysts*. Green Chemistry, 2013. **15**(12): p. 3367-3376.
34. Zhao, Y., et al., *Extraction, preparation and identification of volatile compounds in Changyu XO brandy*. Chinese J. Chromatogr., 2008. **26**(2): p. 212-222.
35. Whitfield, F. and D. Mottram, *Investigation of the reaction between 4-hydroxy-5-methyl-3(2H)-furanone and cysteine or hydrogen sulfide at pH 4.5*. Journal of Agricultural and Food Chemistry, 1999. **47**(4): p. 1626-1634.
36. Pino, J., et al., *Volatile components from Mango (Mangifera indica L.) cultivars*. Journal of Agricultural and Food Chemistry, 2005. **53**(6): p. 2213-2223.
37. Kim, M., et al., *Determination of volatile flavor components in danggui cultivars by solvent free injection and hydrodistillation followed by gas chromatographic-mass spectrometric analysis*. Journal of Chromatography a, 2006. **1116**(1-2): p. 259-264.
38. Majcher, M., P. Lawrowski, and H. Jelen, *Comparison of original and adulterated oscypek cheese based on volatile and sensory profiles*. Acta Sci. Pol. Technol. Aliment., 2010. **9**(3): p. 265-275.
39. Whitfield, F. and D. Mottram, *Heterocyclic volatiles formed by heating cysteine or hydrogen sulfide with 4-hydroxy-5-methyl-3 (2H)-furanone at pH 6.5*. Journal of Agricultural and Food Chemistry, 2001. **49**(2): p. 816-822.
40. Fan, W. and M. Qian, *Characterization of aroma compounds of Chinese "Wuliangye" and "Jiannanchun" liquors by aroma extract dilution analysis*. Journal of Agricultural and Food Chemistry, 2006. **54**(7): p. 2695-2704.
41. Macku, C. and T. Shibamoto, *Volatile sulfur-containing compounds generated from the thermal interaction of corn oil and cysteine*. Journal of Agricultural and Food Chemistry, 1991. **39**(11): p. 1987-1989.
42. Kallio, M., et al., *Comprehensive two-dimensional gas chromatography coupled to time-of-flight mass spectrometry in the identification of organic compounds in atmospheric aerosols from coniferous forest*. Journal of Chromatography a, 2006. **1125**(2): p. 234-243.
43. Kotowska, U., M. Zalikowski, and V. Isidorov, *HS-SPME/GC-MS analysis of volatile and semi-volatile organic compounds emitted from municipal sewage sludge*. Environmental Monitoring and Assessment, 2012. **184**(5): p. 2893-2907.
44. Wang, Z., M. Fingas, and K. Li, *Fractionation of a light crude-oil and identification and quantitation of aliphatic, aromatic, and biomarker compounds by GC-FID and GC-MS - Part II*. Journal of Chromatographic Science, 1994. **32**(9): p. 367-382.
45. Mondello, L., *HS-SPME-GCxGC-MS analysis of Yerba Mate (Ilex paraguariensis) in Shimadzu GC-GC application compendium of comprehensive 2D GC*. Shimadzu Corp., 2012. **1**: p. 1-29.
46. Salvador, Â.C., et al., *Can Volatile Organic Metabolites Be Used to Simultaneously Assess Microbial and Mite Contamination Level in Cereal Grains and Coffee Beans?* Plos One, 2013. **8**(4): p. e59338.
47. Hashizume, M., M. Gordon, and D. Mottram, *Light-induced off-flavor development in cloudy apple juice*. Journal of Agricultural and Food Chemistry, 2007. **55**(22): p. 9177-9182.
48. Rostad, C.E. and W.E. Pereira, *Kovats and lee retention indices determined by gas chromatography/mass spectrometry for organic compounds of environmental interest*. Journal of High Resolution Chromatography, 1986. **9**(6): p. 328-334.
49. Elmore, J.S., et al., *The effects of diet and breed on the volatile compounds of cooked lamb*. Meat Science, 2000. **55**(2): p. 149-159.
50. Timon, M., et al., *Volatile compounds in supercritical carbon dioxide extracts of Iberian ham*. Journal of Agricultural and Food Chemistry, 1998. **46**(12): p. 5143-5150.
51. Pino, J., E. Sauri-Dauh, and R. Marbot, *Changes in volatile compounds of Habanero chile pepper (Capsicum chinense Jack. cv. Habanero) at two ripening stages*. Food Chemistry, 2006. **94**(3): p. 394-398.
52. Usai, M., et al., *Composition and variability of the essential oil of Sardinian Thymus herba-barona Loisel*. Flavour and Fragrance Journal, 2003. **18**(1): p. 21-25.
53. Vasta, V., J. Ratel, and E. Engel, *Mass spectrometry analysis of volatile compounds in raw meat for the authentication of the feeding background of farm animals*. Journal of Agricultural and Food Chemistry, 2007. **55**(12): p. 4630-4639.
54. Owens, J., et al., *Formation of volatile compounds during Bacillus subtilis fermentation of soya beans*. Journal of the Science of Food and Agriculture, 1997. **74**(1): p. 132-140.

55. Elmore, J.S., et al., *Effect of Lipid Composition on Meat-like Model Systems Containing Cysteine, Ribose, and Polyunsaturated Fatty Acids*. Journal of Agricultural and Food Chemistry, 2002. **50**(5): p. 1126-1132.
56. Kim, J. and H. Chung, *GC-MS Analysis of the Volatile Components in Dried Boxthorn (Lycium chinensis) Fruit*. Journal of the Korean Society For Applied Biological Chemistry, 2009. **52**(5): p. 516-524.
57. Turchini, G.M., et al., *Discrimination of origin of farmed trout by means of biometrical parameters, fillet composition and flavor volatile compounds*. Italian Journal of Animal Science, 2004. **3**(2): p. 123-140.
58. Mateo, J., et al., *Volatile Compounds in Spanish Paprika*. Journal of Food Composition and Analysis, 1997. **10**(3): p. 225-232.
59. de Simon, B., et al., *Volatile Compounds in Acacia, Chestnut, Cherry, Ash, and Oak Woods, with a View to Their Use in Cooperage*. Journal of Agricultural and Food Chemistry, 2009. **57**(8): p. 3217-3227.
60. Radulovic, N.S., et al., *Volatiles from vegetative organs of the paleoendemic resurrection plants Ramonda serbica Panc. and Ramonda nathaliae Panc. at Petrov*. J. Serb. Chem. Soc., 2009. **74**: p. 35-44.
61. Wang, Q., et al., *Chemical variation in the essential oil of Ephedra sinica from Northeastern China*. Food Chemistry, 2006. **98**(1): p. 52-58.
62. Adams, R.P., *Systematics of smooth leaf margin Juniperus of the western hemisphere based on leaf essential oils and RAPD DNA fingerprinting*. Biochemical Systematics and Ecology, 2000. **28**(2): p. 149-162.
63. Ames, J., R. Guy, and G. Kipping, *Effect of pH and temperature on the formation of volatile compounds in cysteine/reducing sugar/starch mixtures during extrusion cooking*. Journal of Agricultural and Food Chemistry, 2001. **49**(4): p. 1885-1894.
64. Escudero, A., et al., *Analytical characterization of the aroma of five premium red wines. Insights into the role of odor families and the concept of fruitiness of wines*. Journal of Agricultural and Food Chemistry, 2007. **55**(11): p. 4501-4510.
65. Boylston, T.D. and B.T. Viniyard, *Isolation of volatile flavor compounds from peanut butter using purge-and-trap technique*, in *Instrumental Methods in Food and Beverage Analysis*, D. Wetzal and G. Charalambous, Editors. 1998, Elsevier, B.V. p. 225-243.
66. Moon, S.-Y., M.A. Cliff, and E.C.Y. Li-Chan, *Odour-active components of simulated beef flavour analysed by solid phase microextraction and gas chromatography-mass spectrometry and -olfactometry*. Food Research International, 2006. **39**(3): p. 294-308.
67. Oruna-Concha, M., S. Duckham, and J. Ames, *Comparison of volatile compounds isolated from the skin and flesh of four potato cultivars after baking*. Journal of Agricultural and Food Chemistry, 2001. **49**(5): p. 2414-2421.
68. Welty, W., et al., *Effects of milk fat, cocoa butter, or selected fat replacers on flavor volatiles of chocolate ice cream*. Journal of Dairy Science, 2001. **84**(1): p. 21-30.
69. Macku, C. and T. Shibamoto, *Headspace volatile compounds formed from heated corn-oil and corn-oil with glycine*. Journal of Agricultural and Food Chemistry, 1991. **39**(7): p. 1265-1269.
70. Bredie, W., D. Mottram, and R. Guy, *Aroma volatiles generated during extrusion cooking of maize flour*. Journal of Agricultural and Food Chemistry, 1998. **46**(4): p. 1479-1487.
71. Begnaud, F., C. Peres, and J. Berdague, *Characterization of volatile effluents of livestock buildings by solid-phase microextraction*. International Journal of Environmental Analytical Chemistry, 2003. **83**(10): p. 837-849.
72. Bredie, W., D. Mottram, and R. Guy, *Effect of temperature and pH on the generation of flavor volatiles in extrusion cooking of wheat flour*. Journal of Agricultural and Food Chemistry, 2002. **50**(5): p. 1118-1125.
73. Shivashankar, S., T.K. Roy, and P.N.R. Moorthy, *Headspace solid phase micro extraction and GC/MS analysis of the volatile components in seed and cake of Azadirachta indica A. juss.* Chem. Bull. of Politehnika Univ. Timisoara Romania, 2012. **57**: p. 1-6.
74. Bastos, D., et al., *Essential oil and antioxidant activity of green mate and mate tea (Ilex paraguariensis) infusions*. Journal of Food Composition and Analysis, 2006. **19**(6-7): p. 538-543.
75. Sanz, C., et al., *Comparison of potent odorants in a filtered coffee brew and in an instant coffee beverage by aroma extract dilution analysis (AEDA)*. European Food Research and Technology, 2002. **214**(4): p. 299-302.
76. Vermeulen, C. and S. Collin, *Combinatorial synthesis and sensorial properties of 21 mercapto esters*. Journal of Agricultural and Food Chemistry, 2003. **51**(12): p. 3618-3622.
77. Petronilho, S., et al., *Assessment of the terpenic profile of Callistemon citrinus (Curtis) Skeels from Mexico*. Industrial Crops and Products, 2013. **46**: p. 369-379.
78. Buchin, S., et al., *Identification de composés monoterpéniques, sesquiterpéniques et benzéniques dans un lait d'alpage très riche en ces substances*. Mitt. Lebensmittelunters. Hyg., 2002. **93**: p. 199-216.
79. Adams, R.P., et al., *DNA fingerprinting and terpenoid analysis of Juniperus blancoi var. huehuentensis (Cupressaceae), a new subalpine variety from Durango, Mexico*. Biochemical Systematics and Ecology, 2006. **34**(3): p. 205-211.

80. Jalali, H., et al., *Deeper insight into the monoterpenic composition of Ferula gummosa oleo-gum-resin from Iran*. Industrial Crops and Products, 2012. **36**(1): p. 500-507.
81. Zeng, Y., et al., *Comparative analysis of volatile components from Clematis species growing in China*. Analytica Chimica Acta, 2007. **595**(1-2): p. 328-339.
82. Flamini, G., P.L. Cioni, and I. Morelli, *Differences in the fragrances of pollen and different floral parts of male and female flowers of Laurus nobilis*. J. Agric. Food Chem., 2002. **50**: p. 4647-4652.
83. Liu, J., et al., *Volatile constituents of the leaves and flowers of Salvia przewalskii Maxim. from Tibet*. Flavour and Fragrance Journal, 2006. **21**(3): p. 435-438.
84. Jalali, H., et al., *Assessment of the sesquiterpenic profile of Ferula gummosa oleo-gum-resin (galbanum) from Iran. Contributes to its valuation as a potential source of sesquiterpenic compounds*. Industrial Crops and Products, 2013. **44**: p. 185-191.
85. Campeol, E., et al., *Volatile compounds from three cultivars of Olea europaea from Italy*. Journal of Agricultural and Food Chemistry, 2001. **49**(11): p. 5409-5411.
86. Mottram, D. and F. Whitfield, *Volatile compounds from the reaction of cysteine, ribose, and phospholipid in low-moisture systems*. Journal of Agricultural and Food Chemistry, 1995. **43**(4): p. 984-988.
87. Mahadevan, K. and L. Farmer, *Key Odor Impact Compounds in Three Yeast Extract Pastes*. Journal of Agricultural and Food Chemistry, 2006. **54**(19): p. 7242-7250.
88. Setkova, L., S. Risticvic, and J. Pawliszyn, *Rapid headspace solid-phase microextraction-gas chromatographic-time-of-flight mass spectrometric method for qualitative profiling of ice wine volatile fraction - II: Classification of Canadian and Czech ice wines using statistical evaluation of the data*. Journal of Chromatography a, 2007. **1147**(2): p. 224-240.
89. Damste, J., et al., *Identification of homologous series of alkylated thiophenes, thiolanes, thianes and benzothiophenes present in pyrolysates of sulfur-rich kerogens*. Journal of Chromatography, 1988. **435**(3): p. 435-452.
90. Madruga, M. and D. Mottram, *The effect of pH on the formation of volatile compounds produced by heating a model system containing 5'-Imp and cysteine*. Journal of the Brazilian Chemical Society, 1998. **9**(3): p. 261-271.
91. Flament, I. and Y. Bessière-Thomas, *Coffee Flavor Chemistry*. 2002: Wiley.
92. Lindinger, C., et al., *Identification of Ethyl Formate as a Quality Marker of the Fermented Off-note in Coffee by a Nontargeted Chemometric Approach*. Journal of Agricultural and Food Chemistry, 2009. **57**(21): p. 9972-9978.
93. Maeztu, L., et al., *Characterization of espresso coffee aroma by static headspace GC-MS and sensory flavor profile*. Journal of Agricultural and Food Chemistry, 2001. **49**(11): p. 5437-5444.
94. Cordero, C., C. Bicchi, and P. Rubiolo, *Group-type and fingerprint analysis of roasted food matrices (coffee and hazelnut samples) by comprehensive two-dimensional gas chromatography*. Journal of Agricultural and Food Chemistry, 2008. **56**(17): p. 7655-7666.
95. Sanz, C., et al., *Optimizing headspace temperature and time sampling for identification of volatile compounds in ground roasted Arabica coffee*. Journal of Agricultural and Food Chemistry, 2001. **49**(3): p. 1364-1369.
96. Nebesny, E., et al., *The effect of roasting method on headspace composition of robusta coffee bean aroma*. European Food Research and Technology, 2007. **225**(1): p. 9-19.
97. Piccino, S., et al., *Aromatic composition and potent odorants of the "specialty coffee" brew "Bourbon Pointu" correlated to its three trade classifications*. Food Research International, 2014. **61**: p. 264-271.
98. Chin, S.T., G.T. Eyres, and P.J. Marriott, *Identification of potent odourants in wine and brewed coffee using gas chromatography-olfactometry and comprehensive two-dimensional gas chromatography*. Journal of Chromatography A, 2011. **1218**(42): p. 7487-7498.
99. Mondello, L., et al., *Reliable characterization of coffee bean aroma profiles by automated headspace solid phase microextraction-gas chromatography-mass spectrometry with the support of a dual-filter mass spectra library*. Journal of Separation Science, 2005. **28**(9-10): p. 1101-1109.
100. Lopez-Darias, J., et al., *Developing qualitative extraction profiles of coffee aromas utilizing polymeric ionic liquid sorbent coatings in headspace solid-phase microextraction gas chromatography-mass spectrometry*. Analytical and Bioanalytical Chemistry, 2011. **401**(9): p. 2965-2976.
101. Sanz, C., et al., *Profiles of volatile compounds and sensory analysis of three blends of coffee: influence of different proportions of Arabica and Robusta and influence of roasting coffee with sugar*. Journal of the Science of Food and Agriculture, 2002. **82**(8): p. 840-847.
102. Pereira, G., et al., *Conducting starter culture-controlled fermentations of coffee beans during on-farm wet processing: Growth, metabolic analyses and sensorial effects*. Food Research International, 2015. **75**: p. 348-356.
103. Evangelista, S., et al., *Improvement of coffee beverage quality by using selected yeasts strains during the fermentation in dry process*. Food Research International, 2014. **61**: p. 183-195.
104. Evangelista, S., et al., *Inoculation of starter cultures in a semi-dry coffee (Coffea arabica) fermentation process*. Food Microbiology, 2014. **44**: p. 87-95.
105. Wang, C., et al., *Coffee flavour modification through controlled fermentations of green coffee beans by Saccharomyces cerevisiae and Pichia kluyveri: Part I. Effects from individual yeasts*. Food Research International, 2020. **136**.

106. Akiyama, M., et al., *Analysis of volatile compounds released during the grinding of roasted coffee beans using solid-phase microextraction*. Journal of Agricultural and Food Chemistry, 2003. **51**(7): p. 1961-1969.
107. Akiyama, M., et al., *Characterization of headspace aroma compounds of freshly brewed arabica coffees and studies on a characteristic aroma compound of Ethiopian coffee*. Journal of Food Science, 2008. **73**(5): p. C335-C346.
108. Ascrizzi, R. and G. Flamini, *Wild Harenn coffee: flavour profiling from the bean to the cup*. European Food Research and Technology, 2020. **246**(3): p. 643-660.
109. Gonzalez-Rios, O., et al., *Impact of "ecological" post-harvest processing on coffee aroma: II. Roasted coffee*. Journal of Food Composition and Analysis, 2007. **20**(3-4): p. 297-307.
110. Cui, D., et al., *Application of SPME-GC-TOFMS, E-nose, and sensory evaluation to investigate the flavor characteristics of Chinese Yunnan coffee at three different conditions (beans, ground powder, and brewed coffee)*. Flavour and Fragrance Journal, 2020. **35**(5): p. 541-560.
111. Lee, L., et al., *Modulation of the volatile and non-volatile profiles of coffee fermented with Yarrowia lipolytica: II. Roasted coffee*. Lwt-Food Science and Technology, 2017. **80**: p. 32-42.
112. Kumazawa, K. and H. Masuda, *Identification of odor-active 3-mercapto-3-methylbutyl acetate in volatile fraction of roasted coffee brew isolated by steam distillation under reduced pressure*. Journal of Agricultural and Food Chemistry, 2003. **51**(10): p. 3079-3082.
113. Farag, M., et al., *Sensory Metabolite Profiling in a Date Pit Based Coffee Substitute and in Response to Roasting as Analyzed via Mass Spectrometry Based Metabolomics*. Molecules, 2019. **24**(18).
114. Arctander, S., *Perfume and Flavor Chemicals: (aroma Chemicals)*. 1969: Allured Publishing Corporation.
115. Akiyama, M., et al., *Analysis of the Headspace Volatiles of Freshly Brewed Arabica Coffee Using Solid-Phase Microextraction*. Journal of Food Science, 2007. **72**(7): p. C388-C396.
116. Burdock, G.A., *Fenaroli's Handbook of Flavor Ingredients, Fifth Edition*. 2004, Boca Raton, FL: CRC Press.
117. Czerny, M. and W. Grosch, *Potent odorants of raw Arabica coffee. Their changes during roasting*. Journal of Agricultural and Food Chemistry, 2000. **48**(3): p. 868-872.
118. Blank, I., A. Sen, and W. Grosch, *Potent odorants of the roasted powder and brew of Arabica coffee*. Zeitschrift für Lebensmittel-Untersuchung und Forschung, 1992. **195**(3): p. 239-245.
119. Gonzalez-Rios, O., et al., *Impact of "ecological" post-harvest processing on the volatile fraction of coffee beans: I. Green coffee*. Journal of Food Composition and Analysis, 2007. **20**(3): p. 289-296.
120. Cantergiani, E., et al., *Characterisation of the aroma of green Mexican coffee and identification of mouldy/earthy defect*. European Food Research and Technology, 2001. **212**(6): p. 648-657.
121. Semmelroch, P. and W. Grosch, *Analysis of roasted coffee powders and brews by gas chromatography-olfactometry of headspace samples*. LWT - Food Science and Technology, 1995. **28**(3): p. 310-313.
122. Hofmann, T. and P. Schieberle, *Chemical Interactions between Odor-Active Thiols and Melanoidins Involved in the Aroma Staling of Coffee Beverages*. Journal of Agricultural and Food Chemistry, 2002. **50**(2): p. 319-326.
123. Holscher, W. and H. Steinhart, *Investigation of roasted coffee freshness with an improved headspace technique*. Zeitschrift für Lebensmittel-Untersuchung und Forschung, 1992. **195**(1): p. 33-38.
124. Akiyama, M., et al., *Analysis of Freshly Brewed Espresso Using a Retronasal Aroma Simulator and Influence of Milk Addition*. Food Science and Technology Research, 2009. **15**(3): p. 233-244.
125. Holscher, W. and H. Steinhart, *Formation Pathways for Primary Roasted Coffee Aroma Compounds*, in *Thermally Generated Flavors*. 1993, American Chemical Society. p. 206-217.
126. López-Galilea, I., et al., *Changes in Headspace Volatile Concentrations of Coffee Brews Caused by the Roasting Process and the Brewing Procedure*. Journal of Agricultural and Food Chemistry, 2006. **54**(22): p. 8560-8566.
127. Holscher, W. and H. Steinhart, *Aroma compounds in green coffee*, in *Developments in Food Science*, G. Charalambous, Editor. 1995, Elsevier. p. 785-803.
128. de Melo Pereira, G.V., et al., *Exploring the impacts of postharvest processing on the aroma formation of coffee beans – A review*. Food Chemistry, 2019. **272**: p. 441-452.
129. Zapata, J., et al., *Characterization of aroma compounds present in an industrial recovery concentrate of coffee flavour*. CyTA - Journal of Food, 2018. **16**(1): p. 367-372.
130. Flament, I., *Coffee Flavor Chemistry*. 2001, East Sussex: Wiley.
